# Supplementary material for: Diterpenoids from the shed trunk barks of the endangered plant Pinus dabeshanensis and their PTP1B inhibitory effects
Source: Royal Society of Chemistry journal article supplement (doi:10.1039/c6ra08986k), 2016-01-01
Supplement: c6ra08986k1.pdf [file c6ra08986k1.pdf]

Electronic Supplementary Information (ESI)

**Diterpenoids from the shed trunk barks of the endangered plant *Pinus dabeshanensis*  
and their PTP1B inhibitory effects**

Chang-Ling Hu,<sup>‡a</sup> Juan Xiong,<sup>‡a</sup> Li-Xin Gao,<sup>b</sup> Jia Li,<sup>b</sup> Huaqiang Zeng,<sup>c</sup> Yike Zou,<sup>d</sup> and  
Jin-Feng Hu<sup>\*a</sup>

<sup>a</sup> Department of Natural Products Chemistry, School of Pharmacy, Fudan University, No.  
826 Zhangheng Road, Shanghai 201203, PR China

<sup>b</sup> State Key Laboratory of Drug Research, Shanghai Institute of Materia Medica, Chinese  
Academy of Sciences, No. 555 Zuchongzhi Road, Shanghai 201203, PR China

<sup>c</sup> Institute of Bioengineering and Nanotechnology, 31 Biopolis Way, The Nanos 138669,  
Singapore

<sup>d</sup> Department of Chemistry, University of Pennsylvania, 231 South 34 Street, Philadelphia,  
Pennsylvania 19104-6323, United States

E-mail: jfhu@fudan.edu.cn; \*Telephone/Fax: +86-21-51980172.

<sup>‡</sup> These authors have contributed equally to this work.

## Contents

|                                                                                                                  |          |
|------------------------------------------------------------------------------------------------------------------|----------|
| Compound 1: <sup>1</sup> H NMR (CDCl <sub>3</sub> ) spectrum .....                                               | 1        |
| Compound 1: <sup>1</sup> H NMR (CDCl <sub>3</sub> ) spectrum-Expansion .....                                     | 2        |
| Compound 1: <sup>13</sup> C NMR (CDCl <sub>3</sub> ) spectrum.....                                               | 3        |
| Compound 1: HSQC (CDCl <sub>3</sub> ) spectrum.....                                                              | 4        |
| Mixture of compounds 1 and 10: <sup>1</sup> H- <sup>1</sup> H COSY (CDCl <sub>3</sub> ) spectrum.....            | 5        |
| Mixture of compounds 1 and 10: HMBC (CDCl <sub>3</sub> ) spectrum.....                                           | 6        |
| Compound 1: NOESY (CDCl <sub>3</sub> ) spectrum .....                                                            | 7        |
| Compound 1: (+) HRESIMS .....                                                                                    | 8        |
| <b>Figure S1 and Table S1. Ab initio density functional theory (DFT) calculations of Compounds 1 and 10.....</b> | <b>9</b> |
| Compound 2: <sup>1</sup> H NMR (CDCl <sub>3</sub> ) spectrum .....                                               | 10       |
| Compound 2: <sup>1</sup> H NMR (CDCl <sub>3</sub> ) spectrum-Expansion .....                                     | 11       |
| Compound 2: <sup>13</sup> C NMR (CDCl <sub>3</sub> ) spectrum.....                                               | 12       |
| Compound 2: HSQC (CDCl <sub>3</sub> ) spectrum.....                                                              | 13       |
| Compound 2: <sup>1</sup> H- <sup>1</sup> H COSY (CDCl <sub>3</sub> ) spectrum .....                              | 14       |
| Compound 2: HMBC (CDCl <sub>3</sub> ) spectrum .....                                                             | 15       |
| Compound 2: NOESY (CDCl <sub>3</sub> ) spectrum .....                                                            | 16       |
| Compound 2: (+) HR-ESIMS .....                                                                                   | 17       |
| Compound 3: <sup>1</sup> H NMR (CDCl <sub>3</sub> ) spectrum .....                                               | 18       |
| Compound 3: <sup>1</sup> H NMR (CDCl <sub>3</sub> ) spectrum-Expansion .....                                     | 19       |
| Compound 3: <sup>13</sup> C NMR and DEPT (CDCl <sub>3</sub> ) spectrum .....                                     | 20       |
| Compound 3: HSQC (CDCl <sub>3</sub> ) spectrum.....                                                              | 21       |
| Compound 3: <sup>1</sup> H- <sup>1</sup> H COSY (CDCl <sub>3</sub> ) spectrum .....                              | 22       |
| Compound 3: HMBC (CDCl <sub>3</sub> ) spectrum .....                                                             | 23       |
| Compound 3: NOESY (CDCl <sub>3</sub> ) spectrum .....                                                            | 24       |
| Compound 3: NOESY (CDCl <sub>3</sub> ) spectrum-Expansion .....                                                  | 25       |
| Compound 3: (+) HR-ESIMS .....                                                                                   | 26       |
| Compound 4: <sup>1</sup> H NMR (CDCl <sub>3</sub> ) spectrum .....                                               | 27       |
| Compound 4: <sup>13</sup> C NMR and DEPT (CDCl <sub>3</sub> ) spectrum .....                                     | 28       |
| Compound 4: HSQC (CDCl <sub>3</sub> ) spectrum.....                                                              | 29       |
| Compound 4: <sup>1</sup> H- <sup>1</sup> H COSY (CDCl <sub>3</sub> ) spectrum .....                              | 30       |
| Compound 4: HMBC (CDCl <sub>3</sub> ) spectrum .....                                                             | 31       |
| Compound 4: NOESY (CDCl <sub>3</sub> ) spectrum .....                                                            | 32       |
| Compound 4: (+) HR-ESIMS .....                                                                                   | 33       |
| Compound 5: <sup>1</sup> H NMR (CD <sub>3</sub> OD) spectrum.....                                                | 34       |
| Compound 5: <sup>13</sup> C NMR (CD <sub>3</sub> OD) spectrum .....                                              | 35       |
| Compound 5: NOESY (CD <sub>3</sub> OD) spectrum.....                                                             | 36       |
| Compound 5: (+) HR-ESIMS.....                                                                                    | 37       |
| Compound 6: <sup>1</sup> H NMR (CDCl <sub>3</sub> ) spectrum .....                                               | 38       |
| Compound 6: <sup>13</sup> C NMR (CDCl <sub>3</sub> ) spectrum.....                                               | 39       |
| Compound 6: HSQC (CDCl <sub>3</sub> ) spectrum.....                                                              | 40       |
| Compound 6: HMBC (CDCl <sub>3</sub> ) spectrum .....                                                             | 41       |

|                                                                                     |    |
|-------------------------------------------------------------------------------------|----|
| Compound 6: NOESY (CDCl <sub>3</sub> ) spectrum .....                               | 42 |
| Compound 6: (+) HR-ESIMS .....                                                      | 43 |
| Compound 7: <sup>1</sup> H NMR (CDCl <sub>3</sub> ) spectrum .....                  | 44 |
| Compound 7: <sup>13</sup> C NMR (CDCl <sub>3</sub> ) spectrum.....                  | 45 |
| Compound 7: <sup>1</sup> H- <sup>1</sup> H COSY (CDCl <sub>3</sub> ) spectrum ..... | 46 |
| Compound 7: HMBC (CDCl <sub>3</sub> ) spectrum .....                                | 47 |
| Compound 7: NOESY (CDCl <sub>3</sub> ) spectrum .....                               | 48 |
| Compound 7: (+) HR-ESIMS.....                                                       | 49 |
| Compound 8: <sup>1</sup> H NMR (CDCl <sub>3</sub> ) spectrum.....                   | 50 |
| Compound 8: <sup>13</sup> C NMR (CDCl <sub>3</sub> ) spectrum.....                  | 51 |
| Compound 8: <sup>1</sup> H- <sup>1</sup> H COSY (CDCl <sub>3</sub> ) spectrum ..... | 52 |
| Compound 8: HMBC (CDCl <sub>3</sub> ) spectrum .....                                | 53 |
| Compound 8: NOESY (CDCl <sub>3</sub> ) spectrum.....                                | 54 |
| Compound 8: (+) HR-ESIMS.....                                                       | 55 |
| Compound 9: <sup>1</sup> H NMR (CDCl <sub>3</sub> ) spectrum.....                   | 56 |
| Compound 9: <sup>13</sup> C NMR (CDCl <sub>3</sub> ) spectrum.....                  | 57 |
| Compound 9: <sup>1</sup> H- <sup>1</sup> H COSY (CDCl <sub>3</sub> ) spectrum ..... | 58 |
| Compound 9: HMBC (CDCl <sub>3</sub> ) spectrum .....                                | 59 |
| Compound 9: NOESY (CDCl <sub>3</sub> ) spectrum.....                                | 60 |
| Compound 9: (+) HR-ESIMS.....                                                       | 61 |
| Compound 10: <sup>1</sup> H NMR (CDCl <sub>3</sub> ) spectrum .....                 | 62 |
| Compound 10: <sup>1</sup> H NMR (CDCl <sub>3</sub> ) spectrum-Expansion.....        | 63 |
| Compound 10: <sup>13</sup> C NMR (CDCl <sub>3</sub> ) spectrum.....                 | 64 |
| Compound 10: HSQC (CDCl <sub>3</sub> ) spectrum.....                                | 65 |
| Compound 10: NOESY (CDCl <sub>3</sub> ) spectrum .....                              | 66 |
| Compound 10: (+) HR-ESIMS.....                                                      | 67 |
| Compound 11: <sup>1</sup> H NMR (CDCl <sub>3</sub> ) spectrum.....                  | 68 |
| Compound 11: <sup>13</sup> C NMR and DEPT(CDCl <sub>3</sub> ) spectrum .....        | 69 |
| Compound 11: HSQC (CDCl <sub>3</sub> ) spectrum.....                                | 70 |
| Compound 11: HMBC (CDCl <sub>3</sub> ) spectrum .....                               | 71 |
| Compound 11: (+) HR-ESIMS.....                                                      | 72 |
| Spectroscopic data of the known compounds <b>12–39</b> .....                        | 72 |

Compound 1:  $^1\text{H}$  NMR ( $\text{CDCl}_3$ ) spectrum

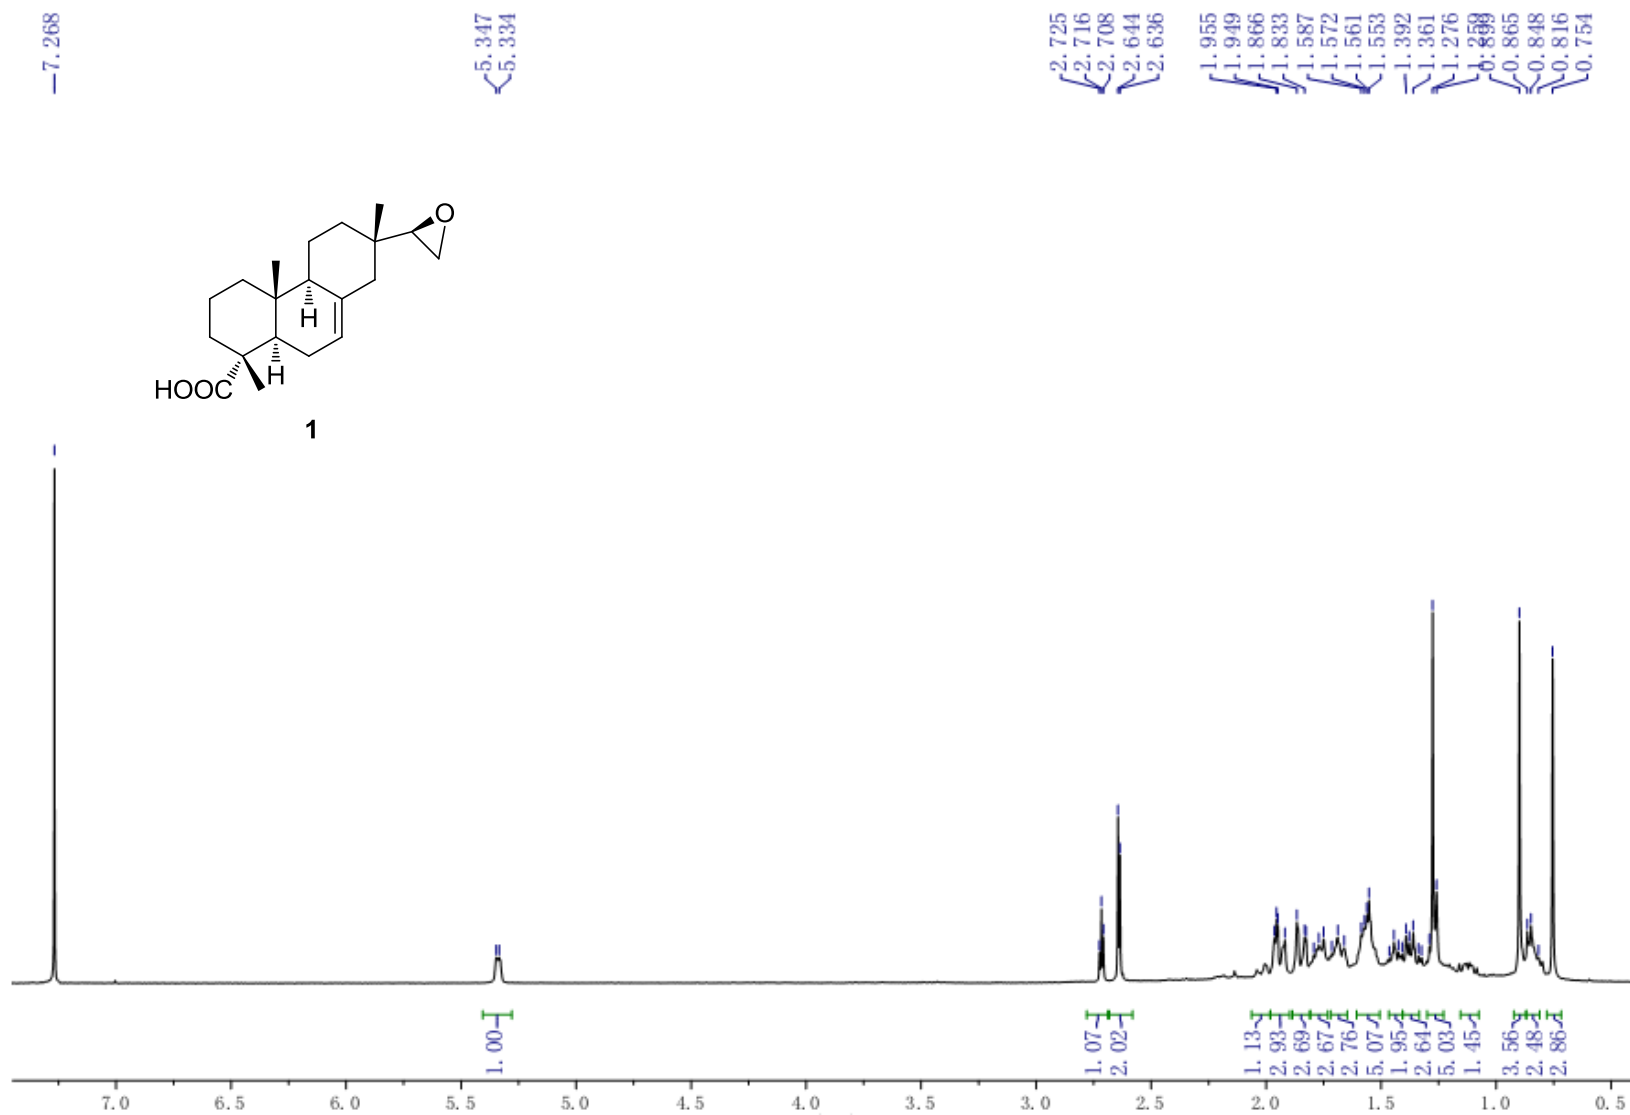

# Compound 1: $^1\text{H}$ NMR ( $\text{CDCl}_3$ ) spectrum-Expansion

2.725  
2.716  
2.708  
2.644  
2.636

1.964  
1.955  
1.949  
1.918  
1.866  
1.833  
1.826  
1.793  
1.771  
1.750  
1.714  
1.688  
1.660  
1.572  
1.561  
1.553  
1.538  
1.444  
1.424  
1.408  
1.392  
1.378  
1.361  
1.337  
1.324  
1.290  
1.276  
1.259

0.899  
0.865  
0.848  
0.816  
0.754

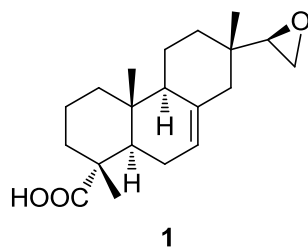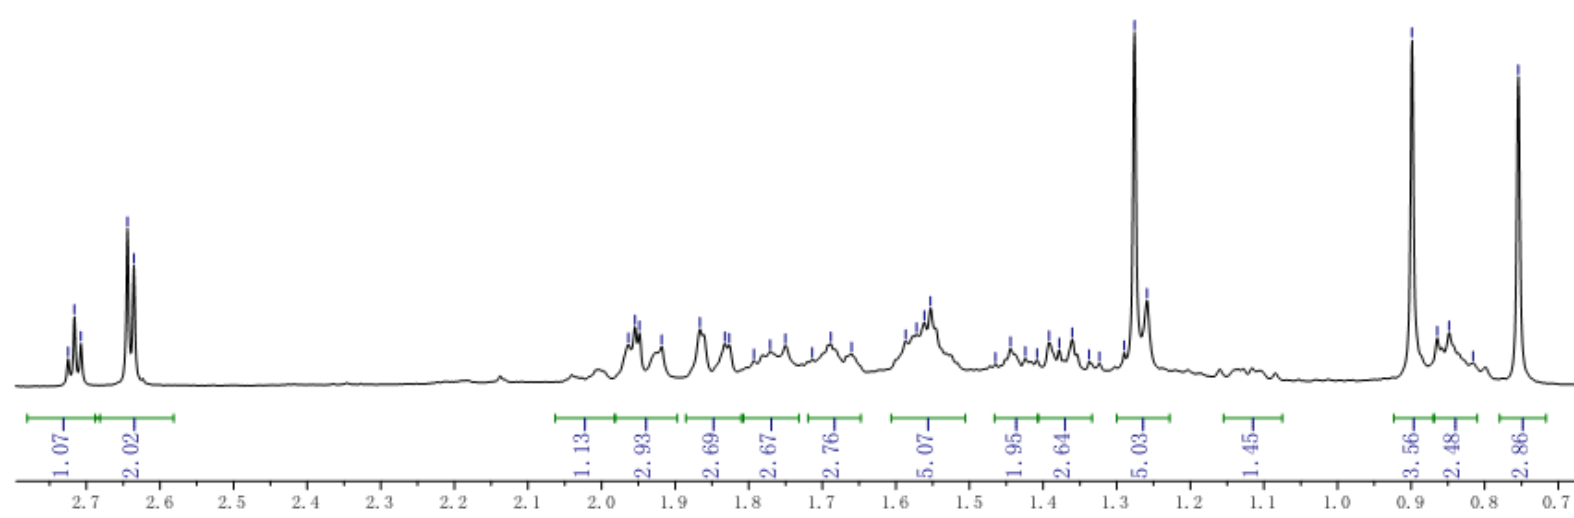

Compound 1:  $^{13}\text{C}$  NMR ( $\text{CDCl}_3$ ) spectrum

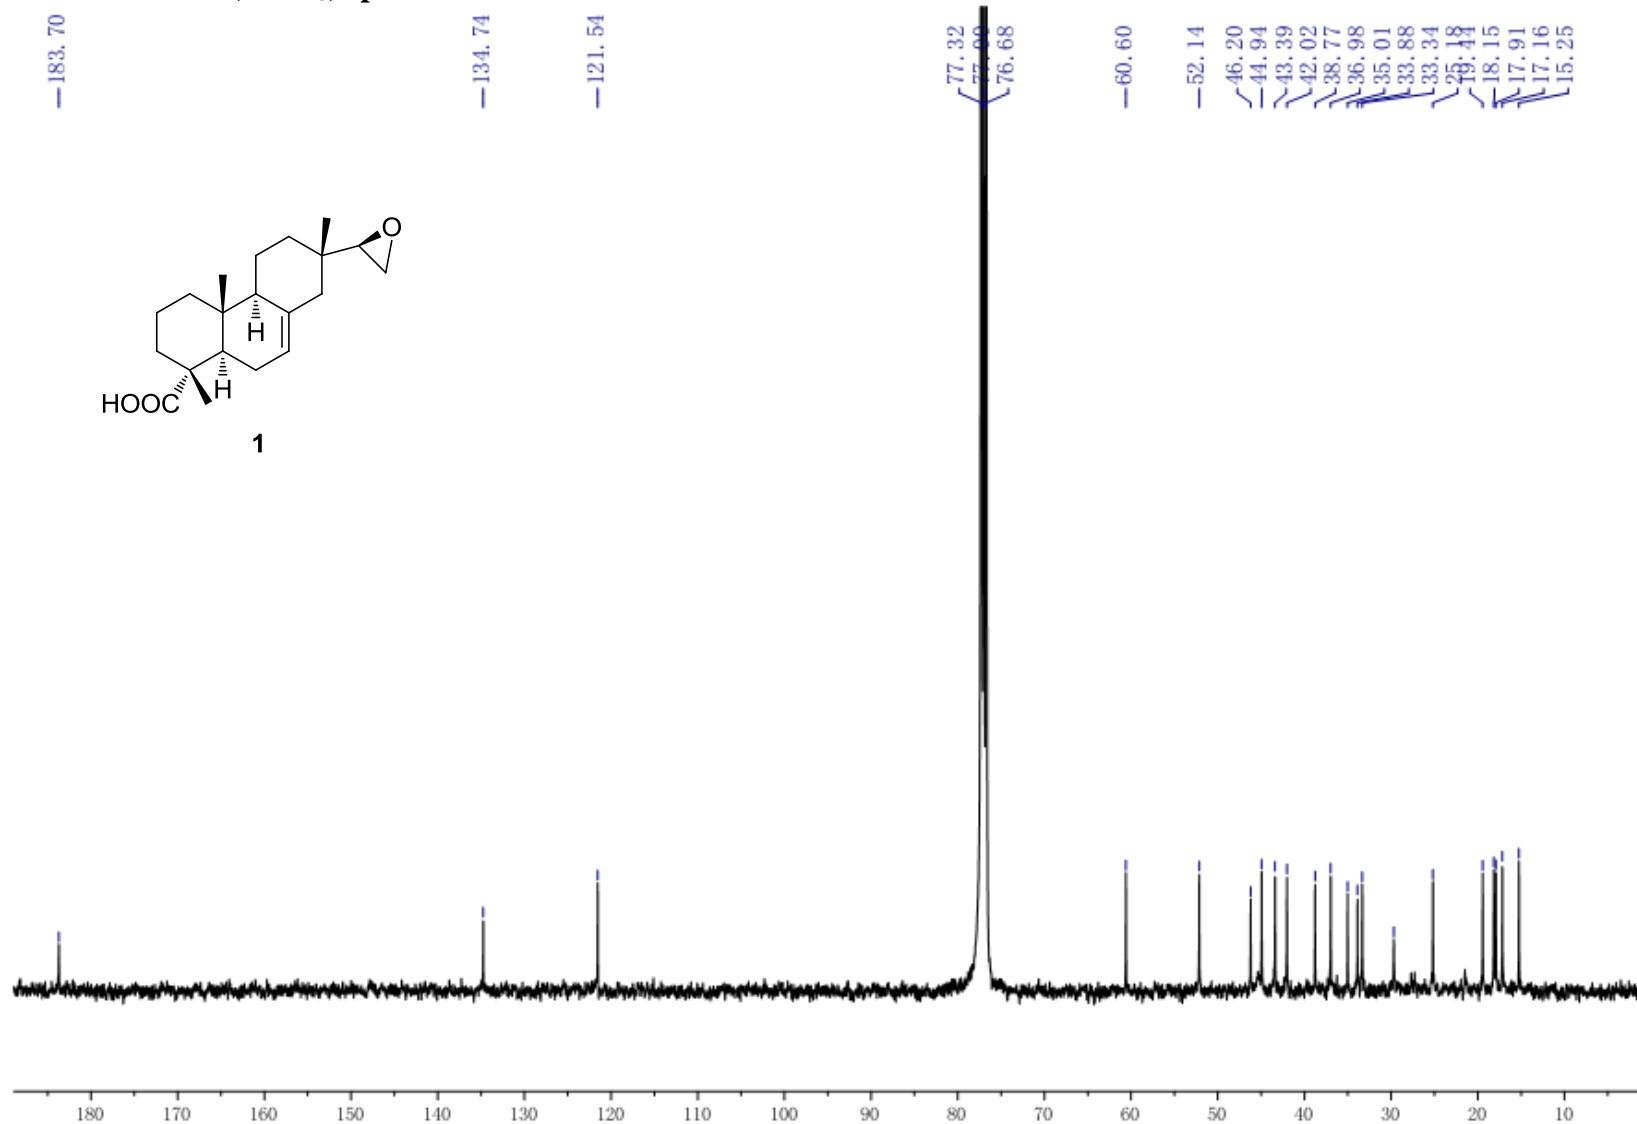

**Compound 1: HSQC (CDCl<sub>3</sub>) spectrum**

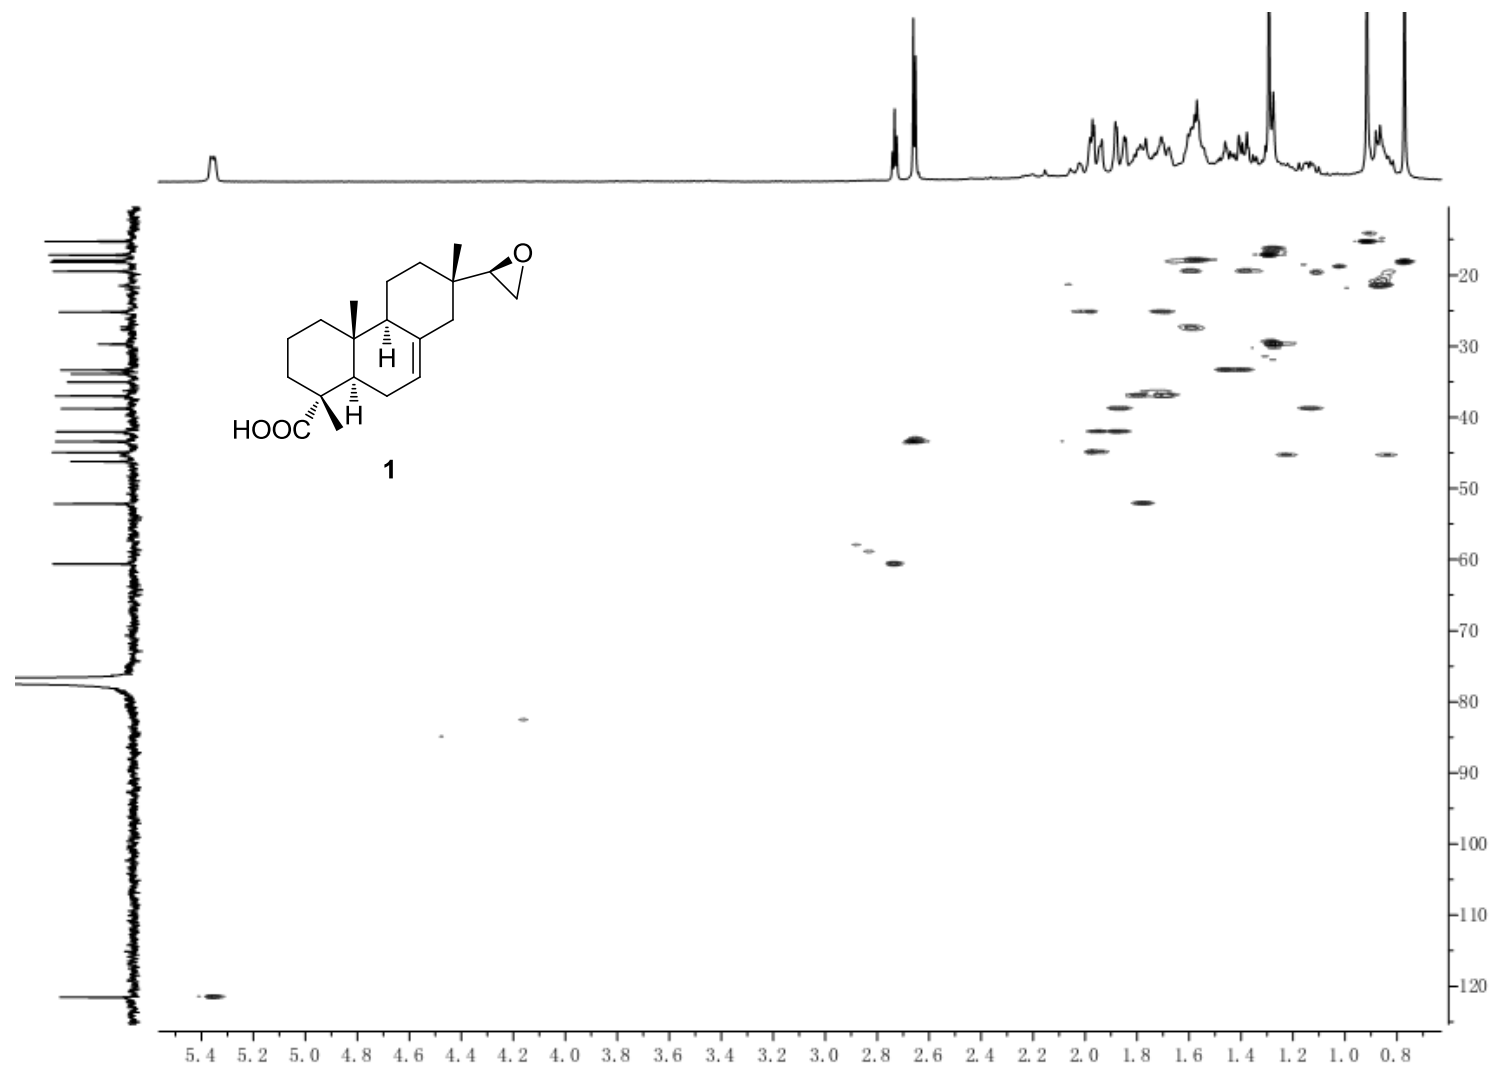

Mixture of compounds 1 and 10:  $^1\text{H}$ - $^1\text{H}$  COSY ( $\text{CDCl}_3$ ) spectrum

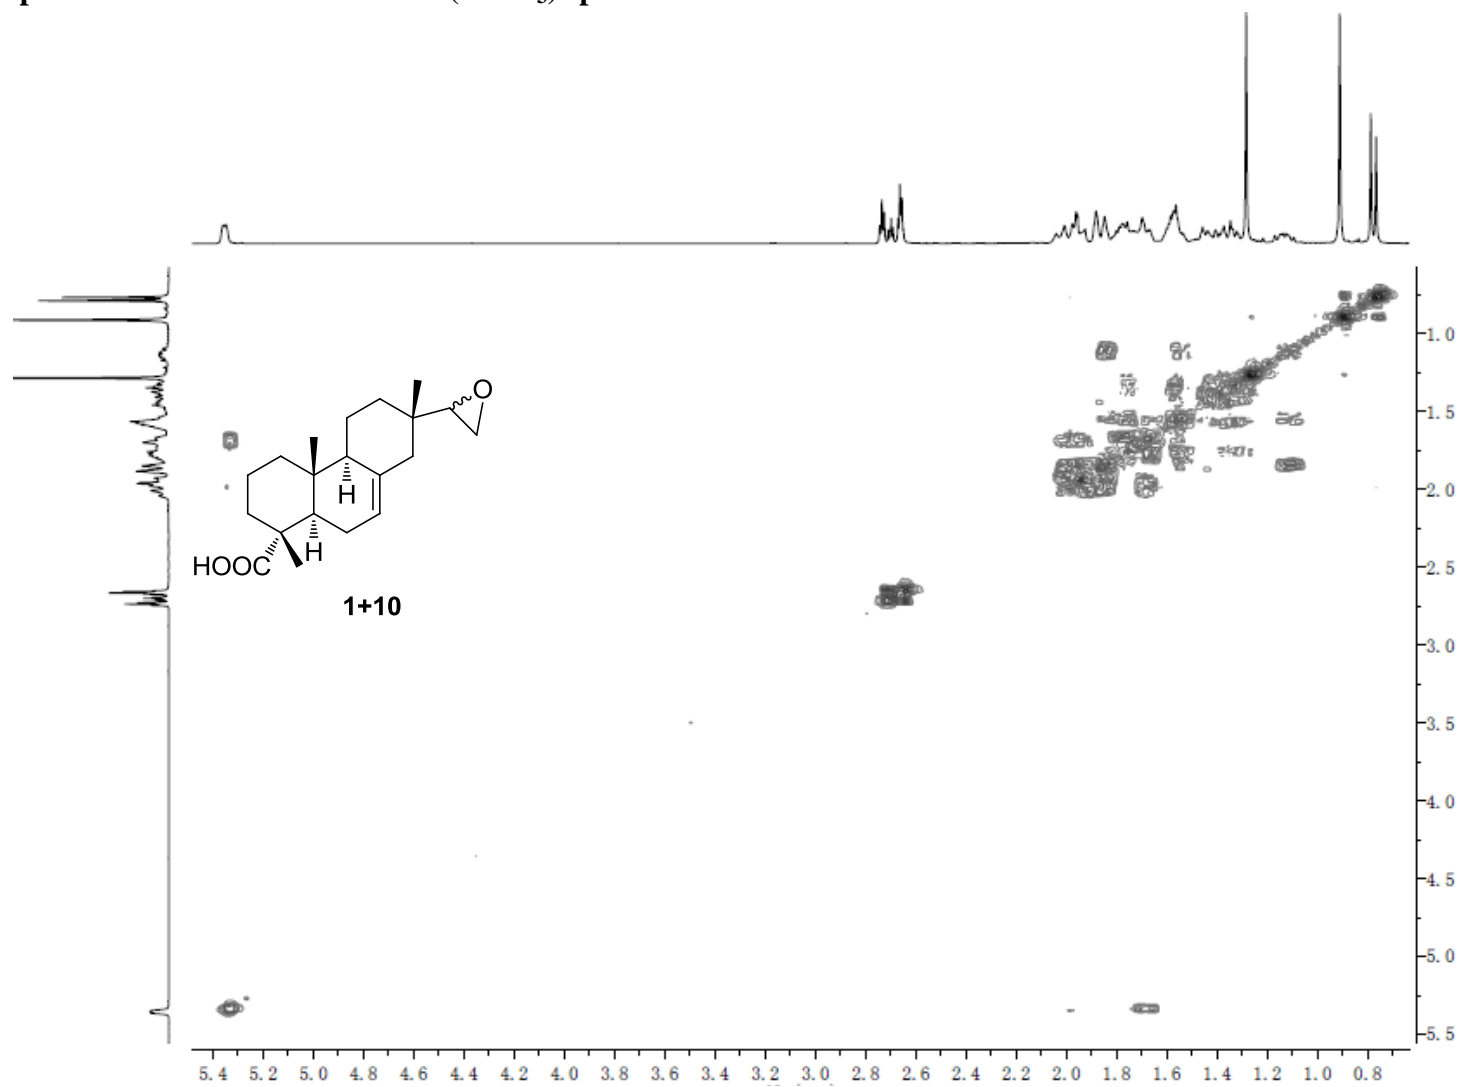



Mixture of compounds 1 and 10: HMBC (CDCl<sub>3</sub>) spectrum

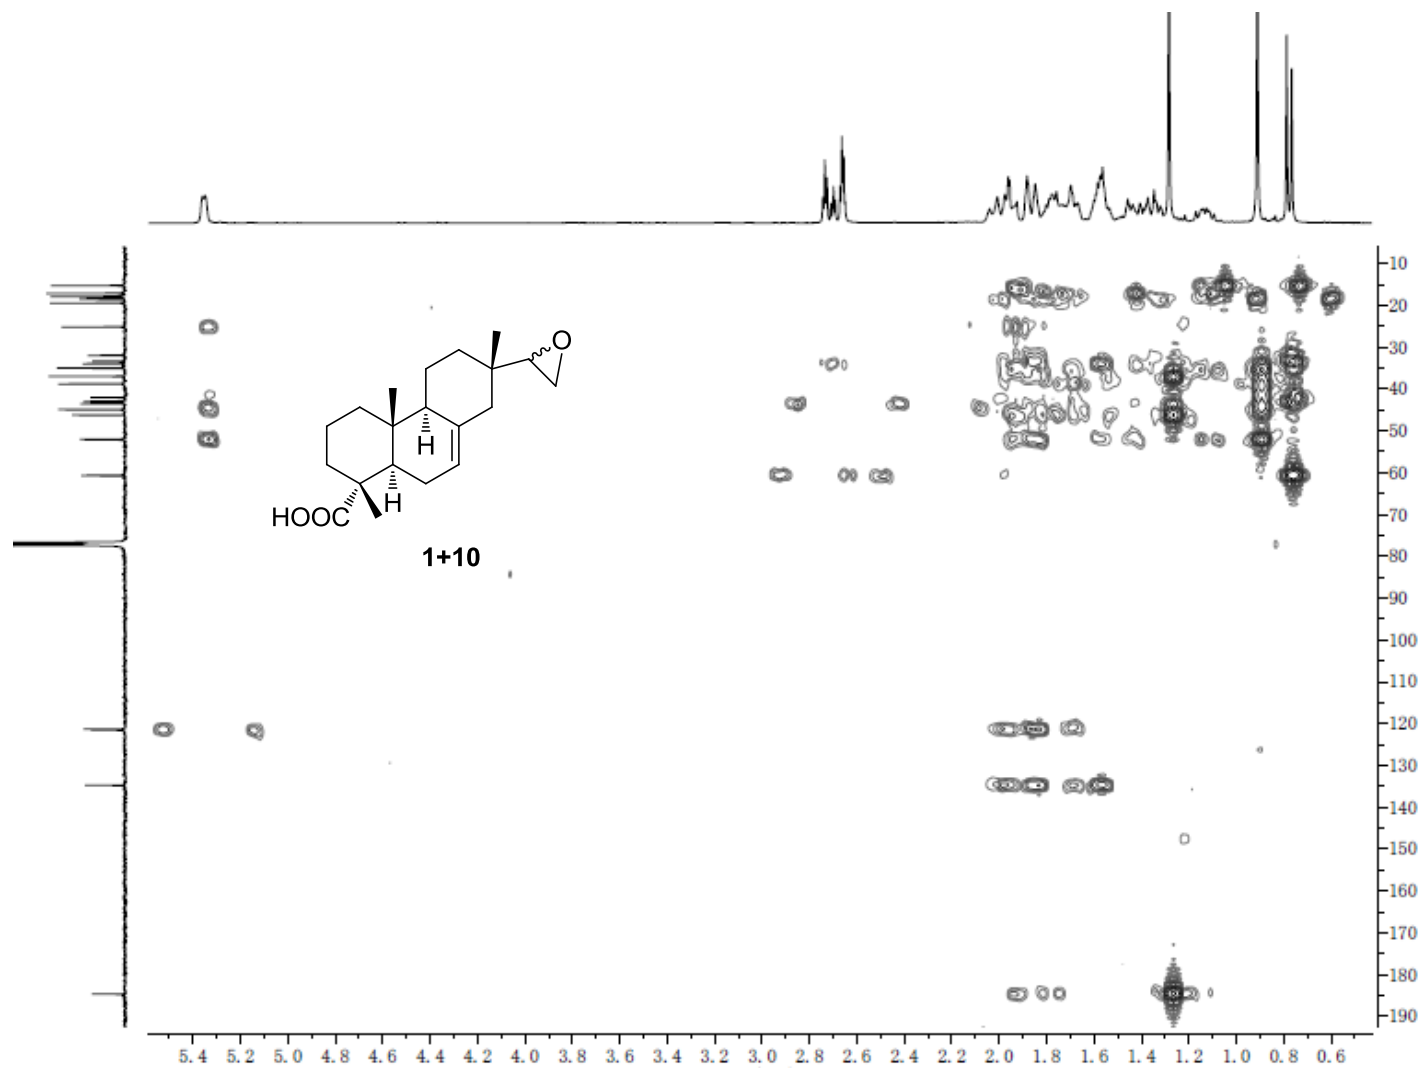

**Compound 1: NOESY (CDCl<sub>3</sub>) spectrum**

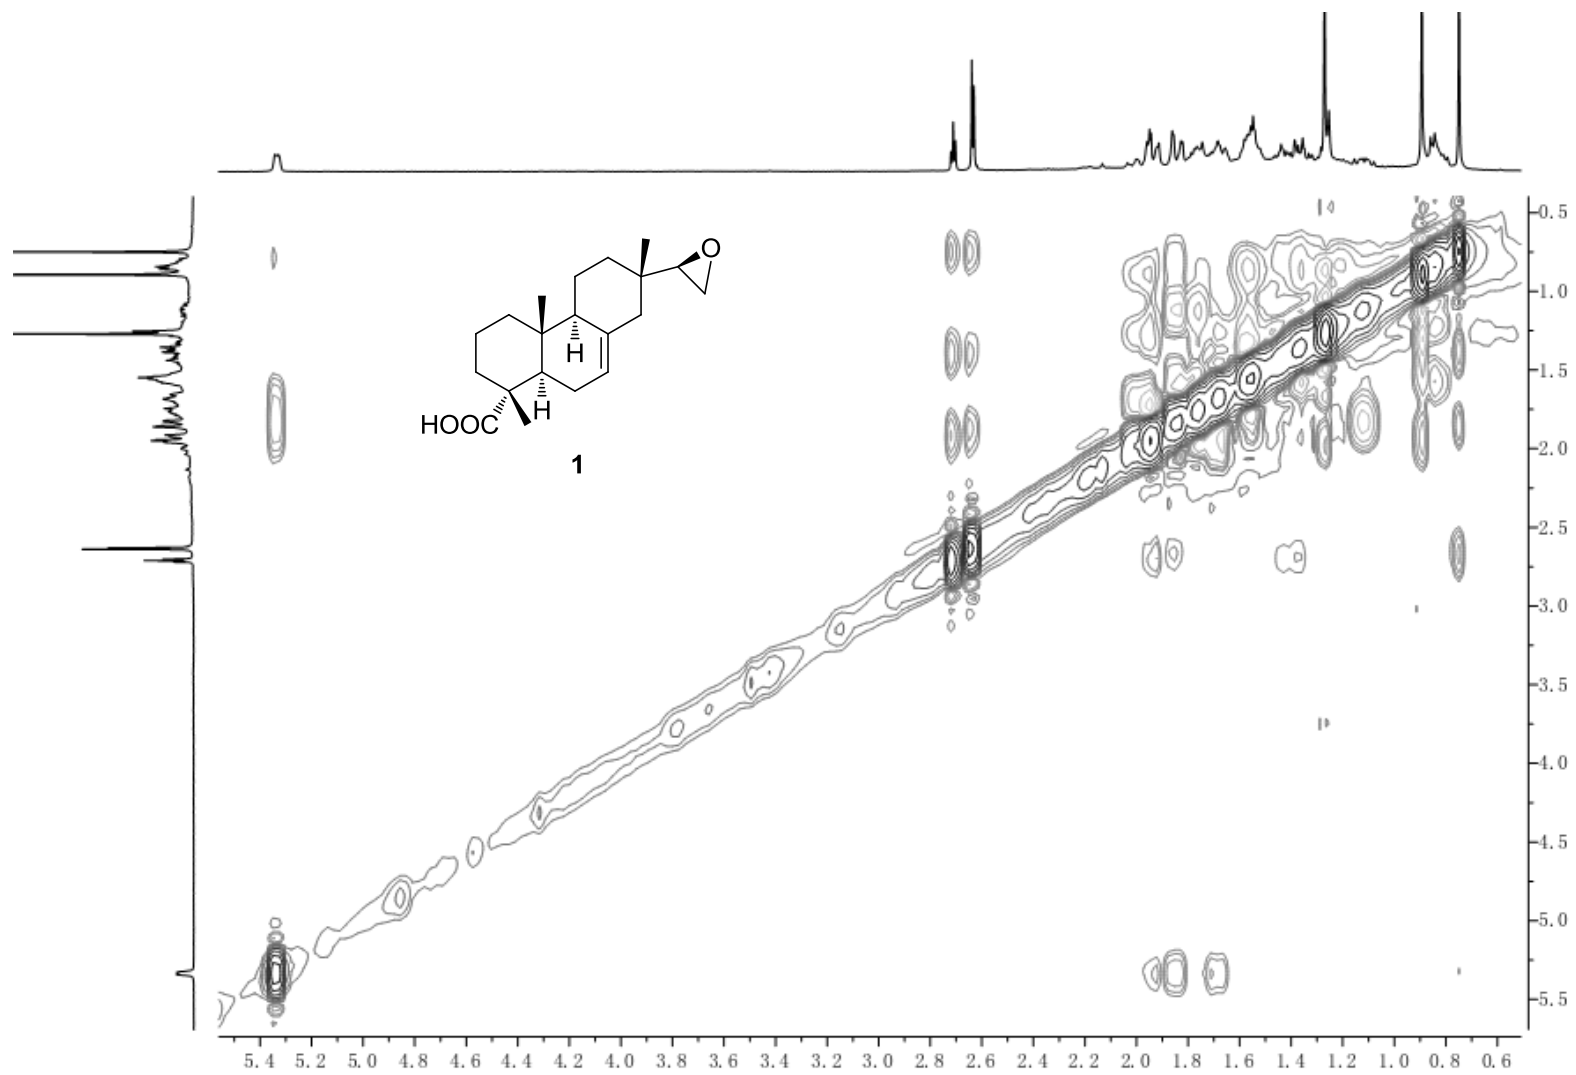

# Compound 1: (+) HRESIMS

## Qualitative Analysis Report

|                        |                  |               |                       |
|------------------------|------------------|---------------|-----------------------|
| Data Filename          | WZS160-2.d       | Sample Name   | WZS160                |
| Sample Type            | Sample           | Position      | P1-D7                 |
| Instrument Name        | Instrument 1     | User Name     |                       |
| Acq Method             | general test 2.m | Acquired Time | 12/19/2013 5:23:04 PM |
| IRM Calibration Status | Some Ions Missed | DA Method     | Screening-Default.m   |
| Comment                |                  |               |                       |

### User Spectra

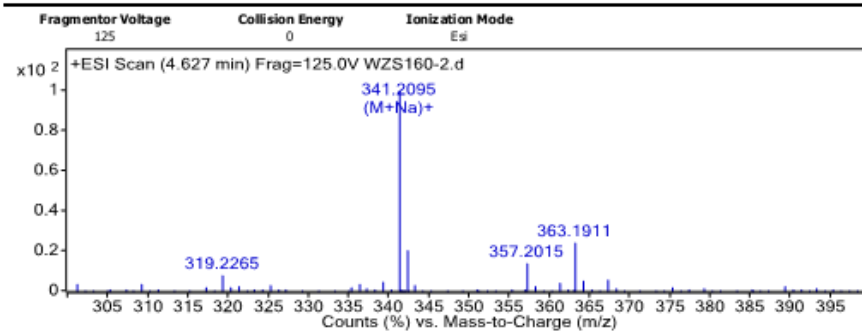

### Peak List

| m/z      | z | Abund  | Formula                                          | Ion                 |
|----------|---|--------|--------------------------------------------------|---------------------|
| 341.2095 | 1 | 630460 | C <sub>20</sub> H <sub>30</sub> NaO <sub>3</sub> | (M+Na) <sup>+</sup> |

### Formula Calculator Element Limits

| Element | Min | Max   |
|---------|-----|-------|
| C       |     | 3 60  |
| H       |     | 0 120 |
| O       |     | 0 30  |
| N       |     | 0 1   |
| S       |     | 0 0   |
| Cl      |     | 0 0   |
| Br      |     | 0 0   |
| Si      |     | 0 0   |

### Formula Calculator Results

| Formula                                        | Best | Mass     | Tgt Mass | Diff (ppm) | Ion Species                                      | Score |
|------------------------------------------------|------|----------|----------|------------|--------------------------------------------------|-------|
| C <sub>20</sub> H <sub>30</sub> O <sub>3</sub> | TRUE | 318.2203 | 318.2195 | -2.46      | C <sub>20</sub> H <sub>30</sub> NaO <sub>3</sub> | 96.16 |

--- End Of Report ---

**Figure S1 and Table S1.** *Ab initio* density functional theory (DFT) calculations of compounds **1** and **10**.

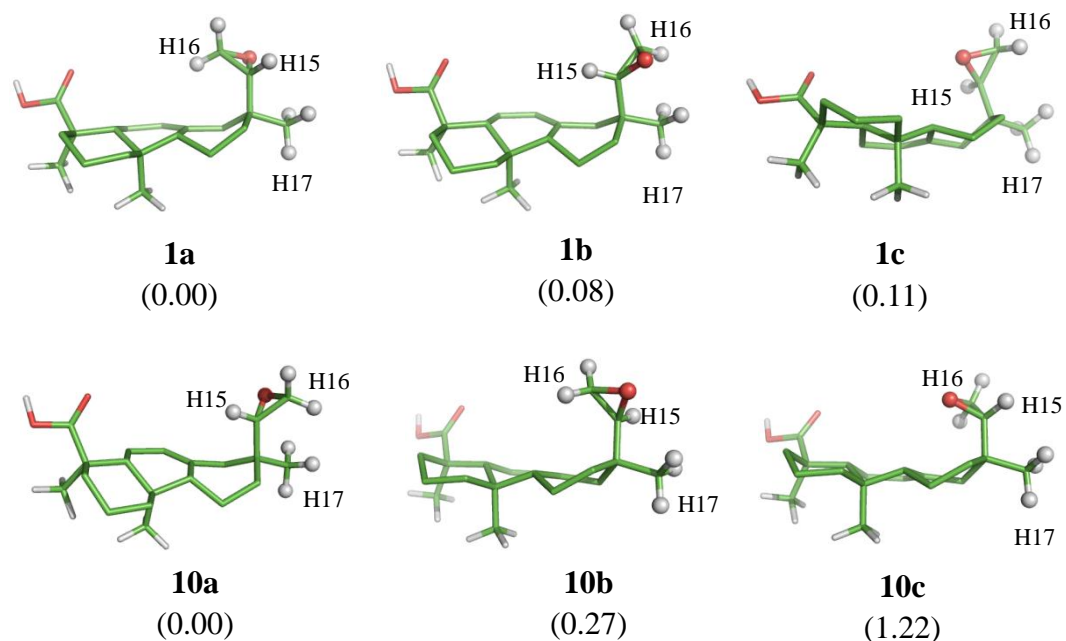

**Figure S1.** *Ab initio* (B3LYP/6-31G\* level in the Gas Phase) optimized conformers (**1a–1c** and **10a–10c**) derived from compounds **1** and **10**. Highlighted as white spheres are those critical hydrogen atoms (H-15, H-16 and H-17) that allows us to confidently assign one of these six conformers (**1a–1c** and **10a–10c**). Shown in parenthesis is the calculated relative energy (kcal/mol) normalized against the most stable conformers **1a** and **10a**. Color code: green = carbon, white = hydrogen, red = oxygen.

**Table S1.** Conformation analysis of **1a–1c** and **10a–10c**.

|                            | <b>1a</b> | <b>1b</b>  | <b>1c</b> | <b>10a</b> | <b>10b</b> | <b>10c</b> |
|----------------------------|-----------|------------|-----------|------------|------------|------------|
| Relative Energy (kcal/mol) | 0.00      | 0.08       | 0.11      | 0.00       | 0.27       | 1.22       |
| H15-H17 (Å)                | 2.52      | 3.78, 3.83 | 2.63      | 3.75       | 2.48, 3.08 | 2.40, 2.90 |
| H16-H17 (Å)                | 4.24      | 2.27, 2.62 | 2.83      | 2.26, 2.75 | 4.30       | 3.56, 3.94 |

Relative energy, relative zero point energy, and relative Gibbs free energy at the B3LYP/6-31G\* level in the Gas Phase. The calculated Boltzmann-averaged interproton distances (in Å) for all possible conformers (**1a–1c** and **10a–10c**).

Compound 2:  $^1\text{H}$  NMR ( $\text{CDCl}_3$ ) spectrum

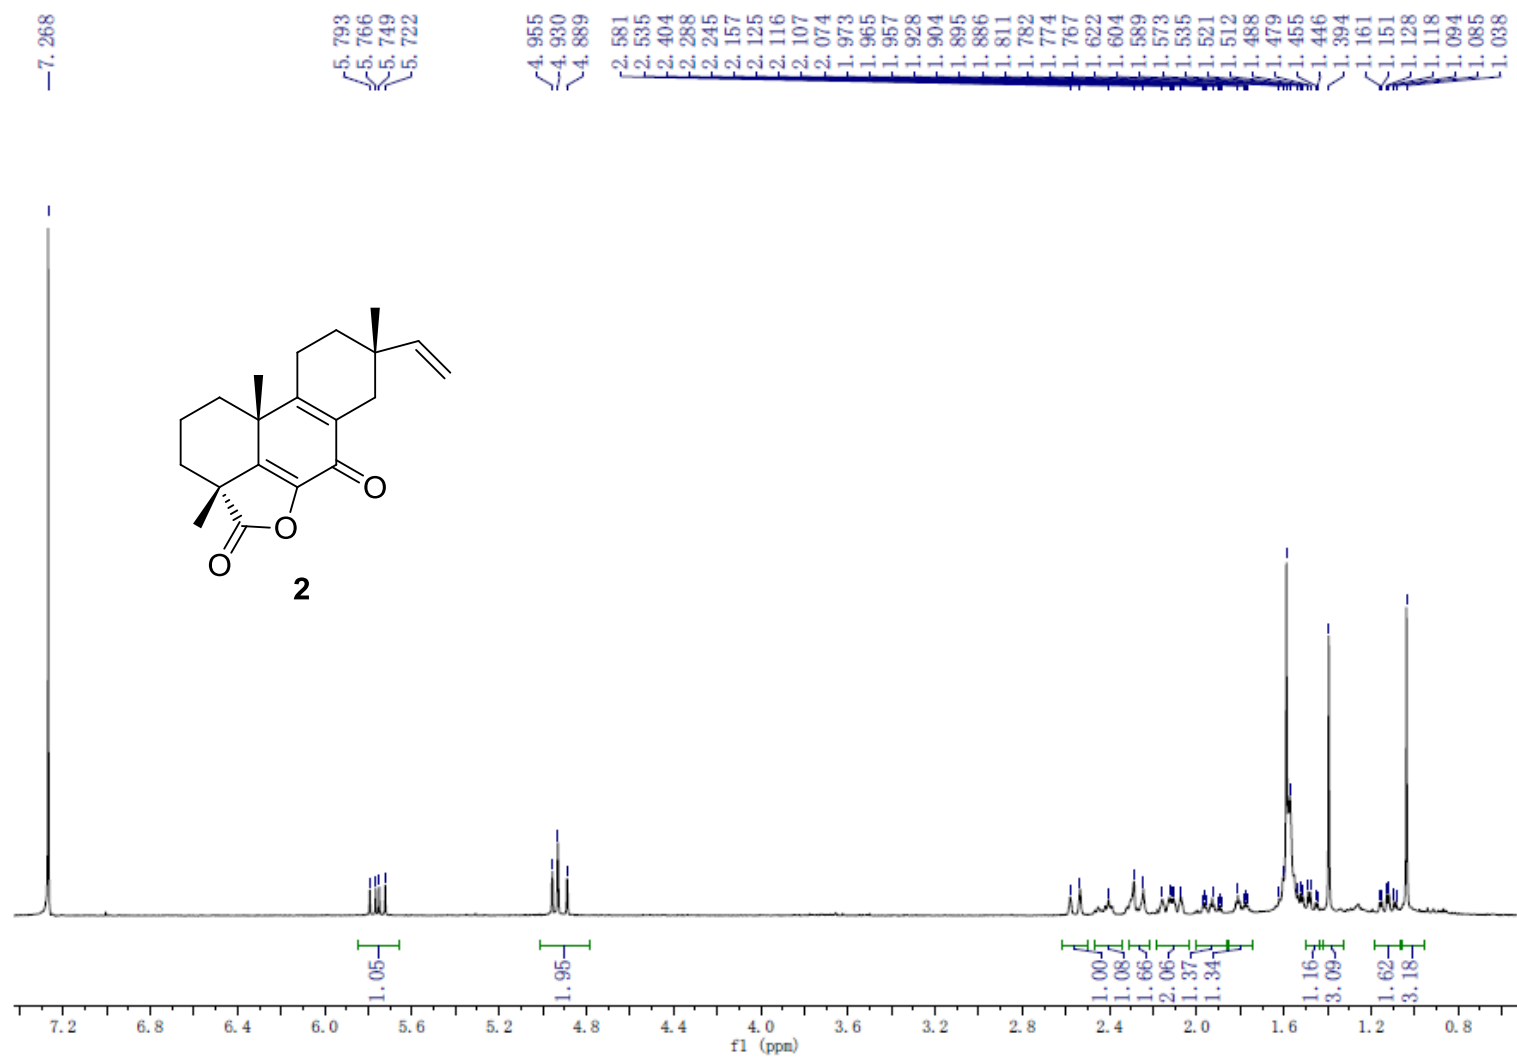

**Compound 2:  $^1\text{H}$  NMR ( $\text{CDCl}_3$ ) spectrum-Expansion**

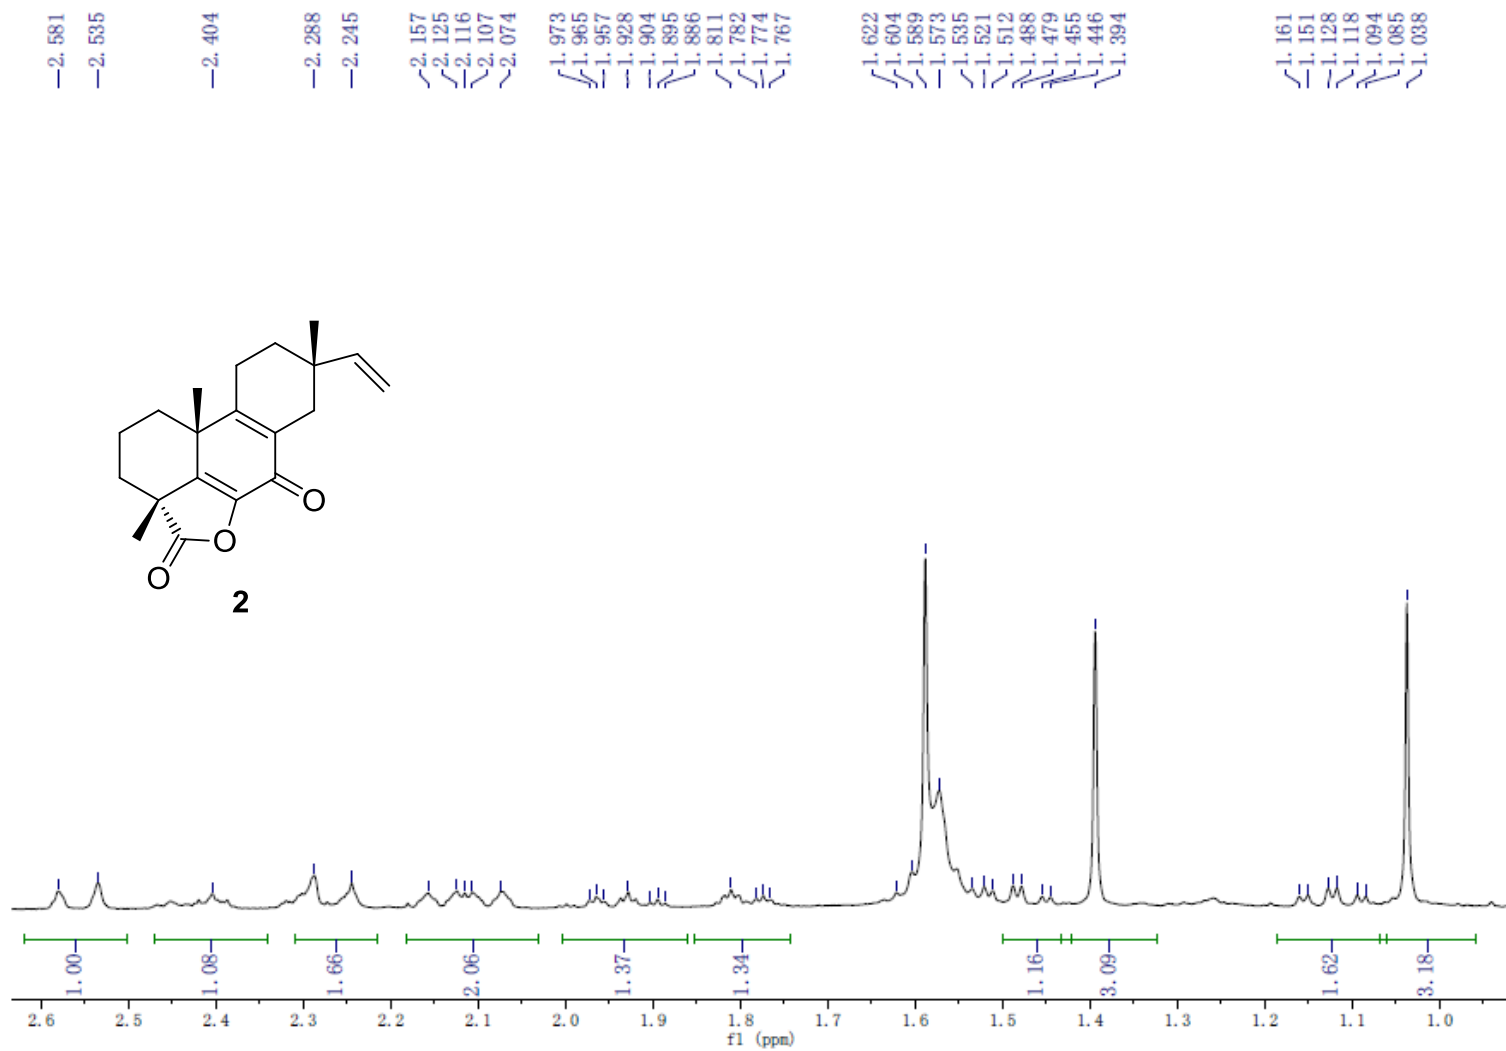

Compound 2:  $^{13}\text{C}$  NMR ( $\text{CDCl}_3$ ) spectrum

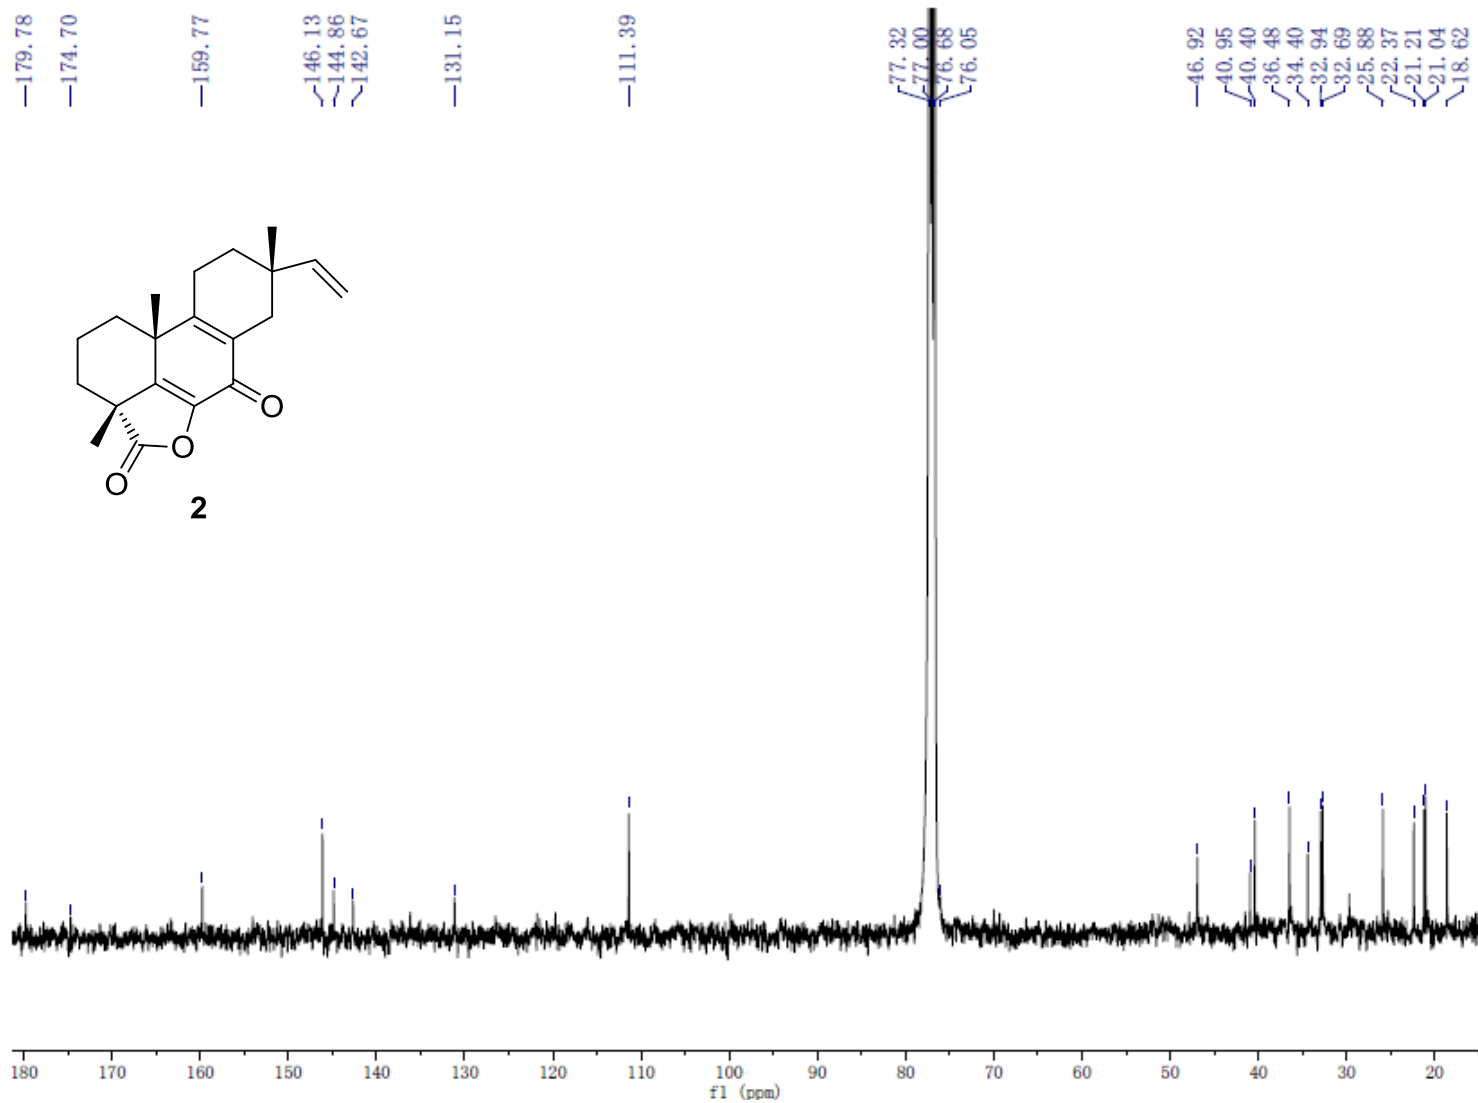

**Compound 2: HSQC (CDCl<sub>3</sub>) spectrum**

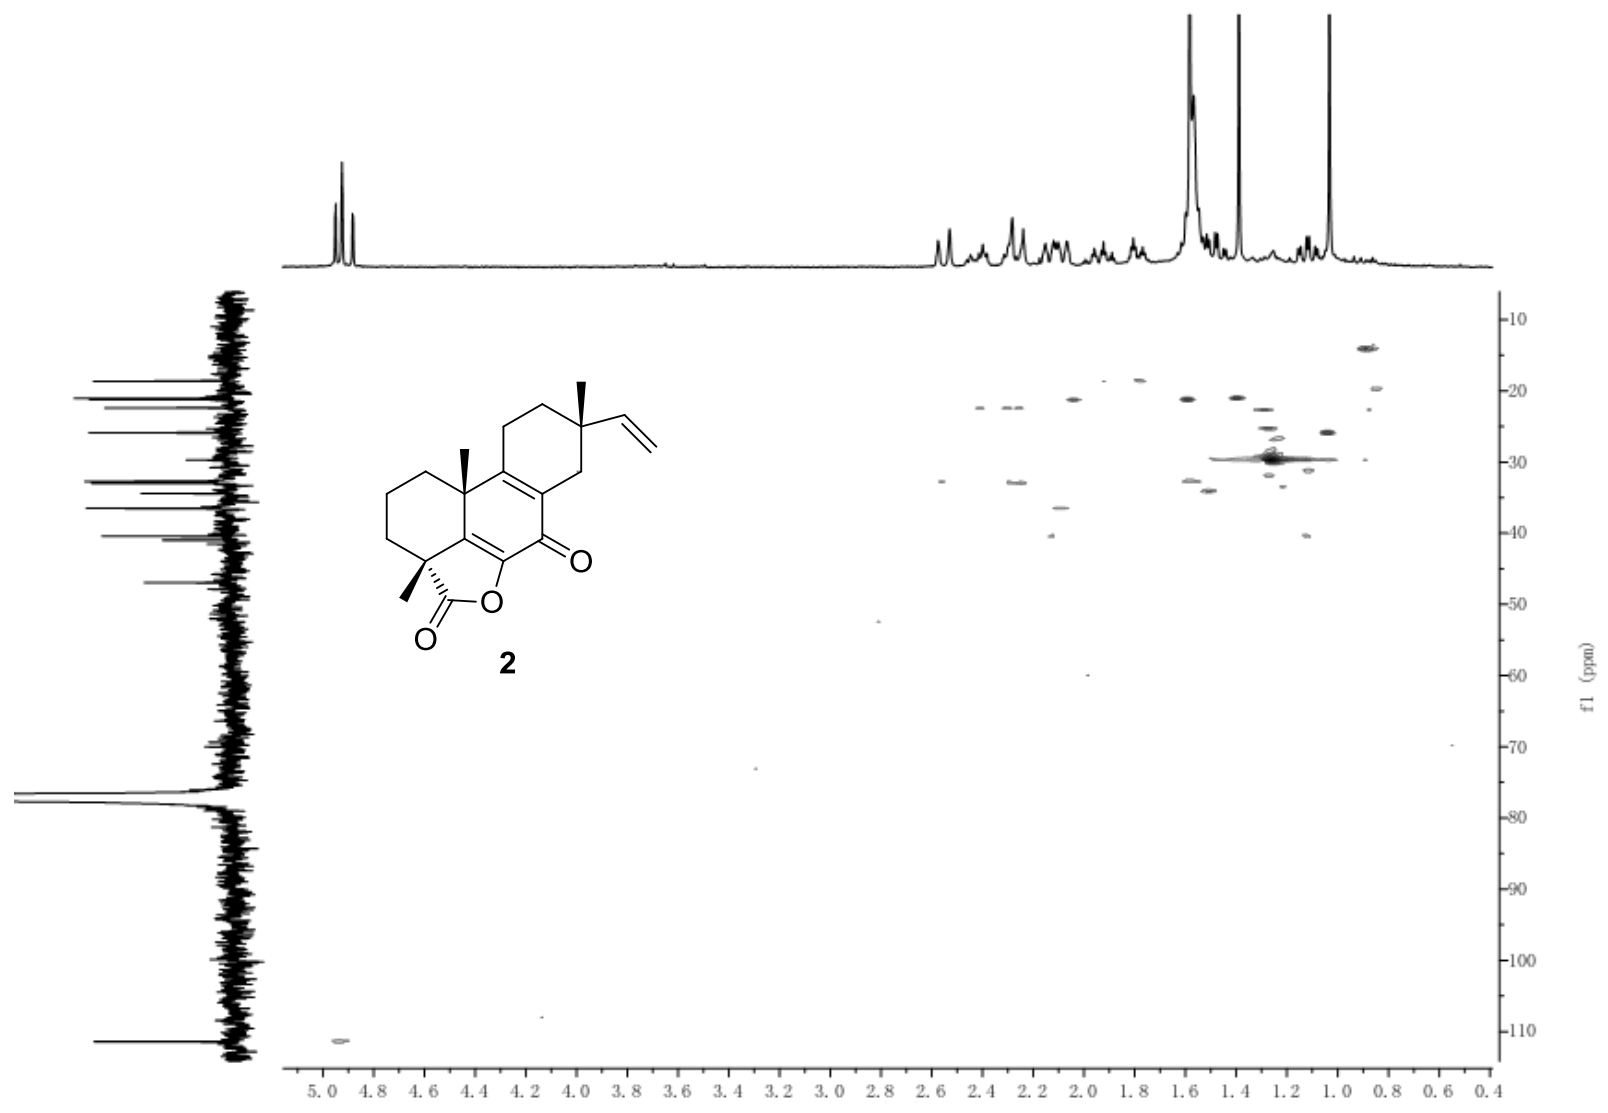



Compound 2:  $^1\text{H}$ - $^1\text{H}$  COSY ( $\text{CDCl}_3$ ) spectrum

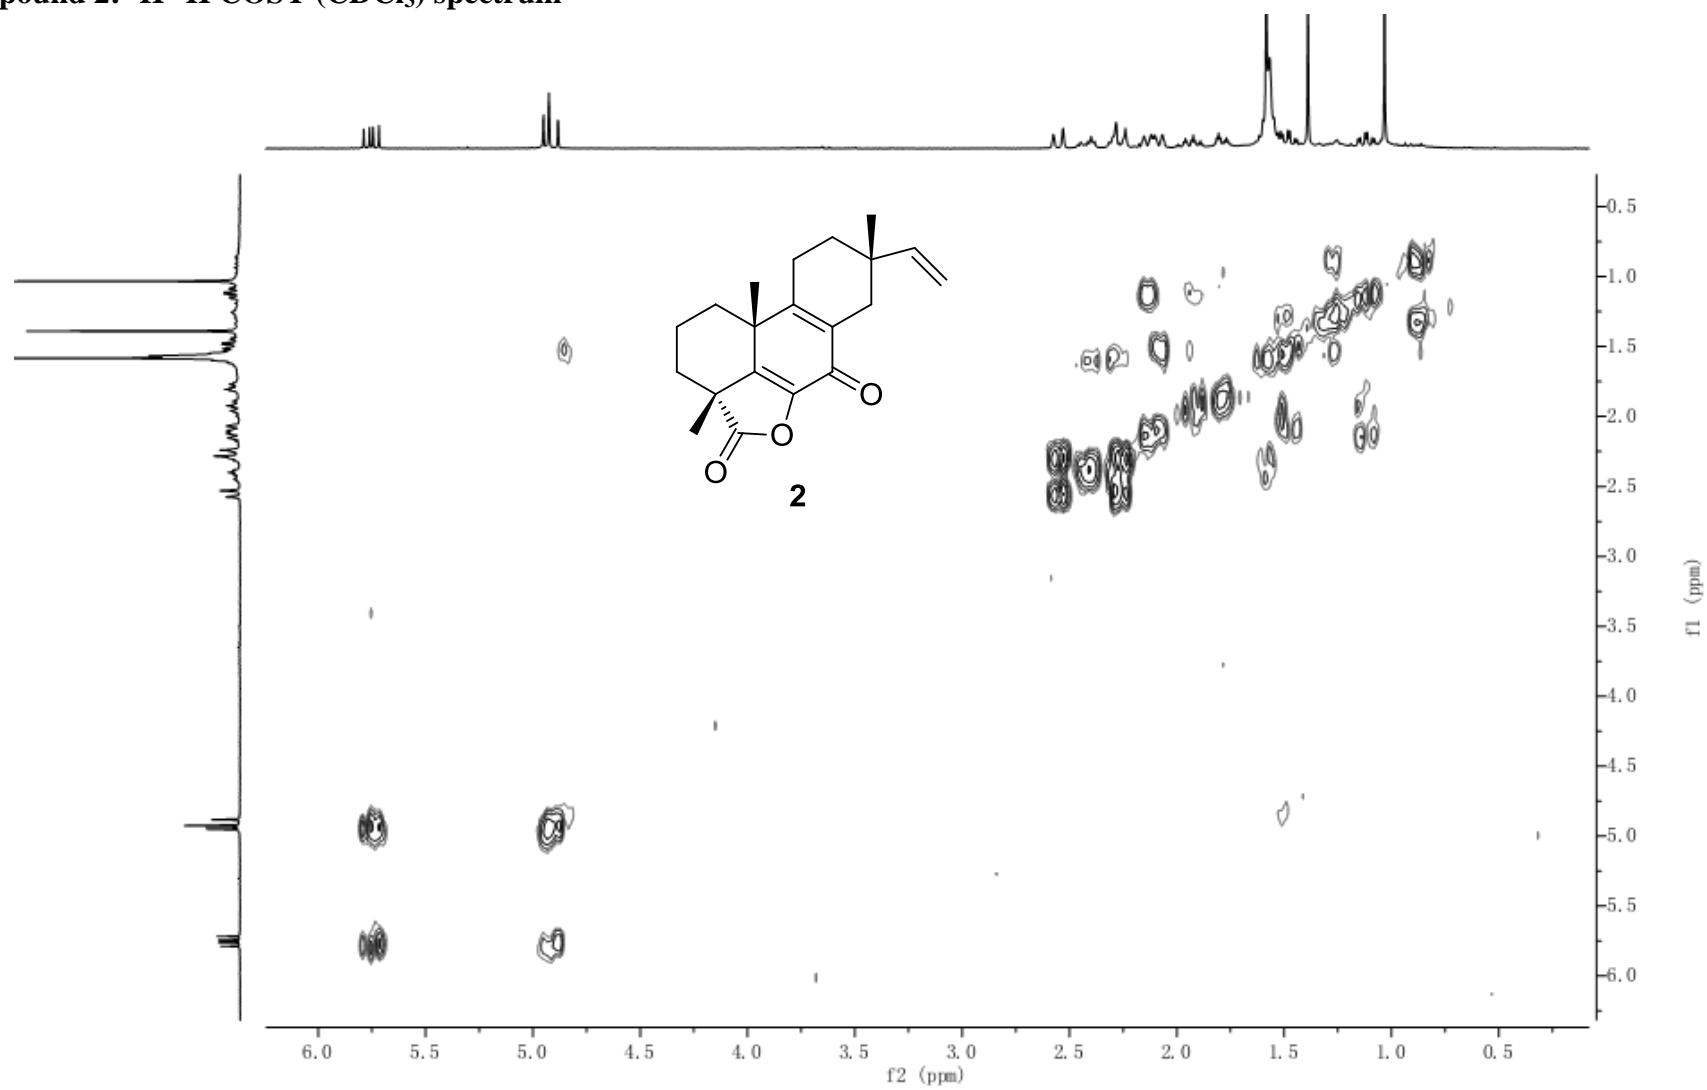

Compound 2: HMBC (CDCl<sub>3</sub>) spectrum

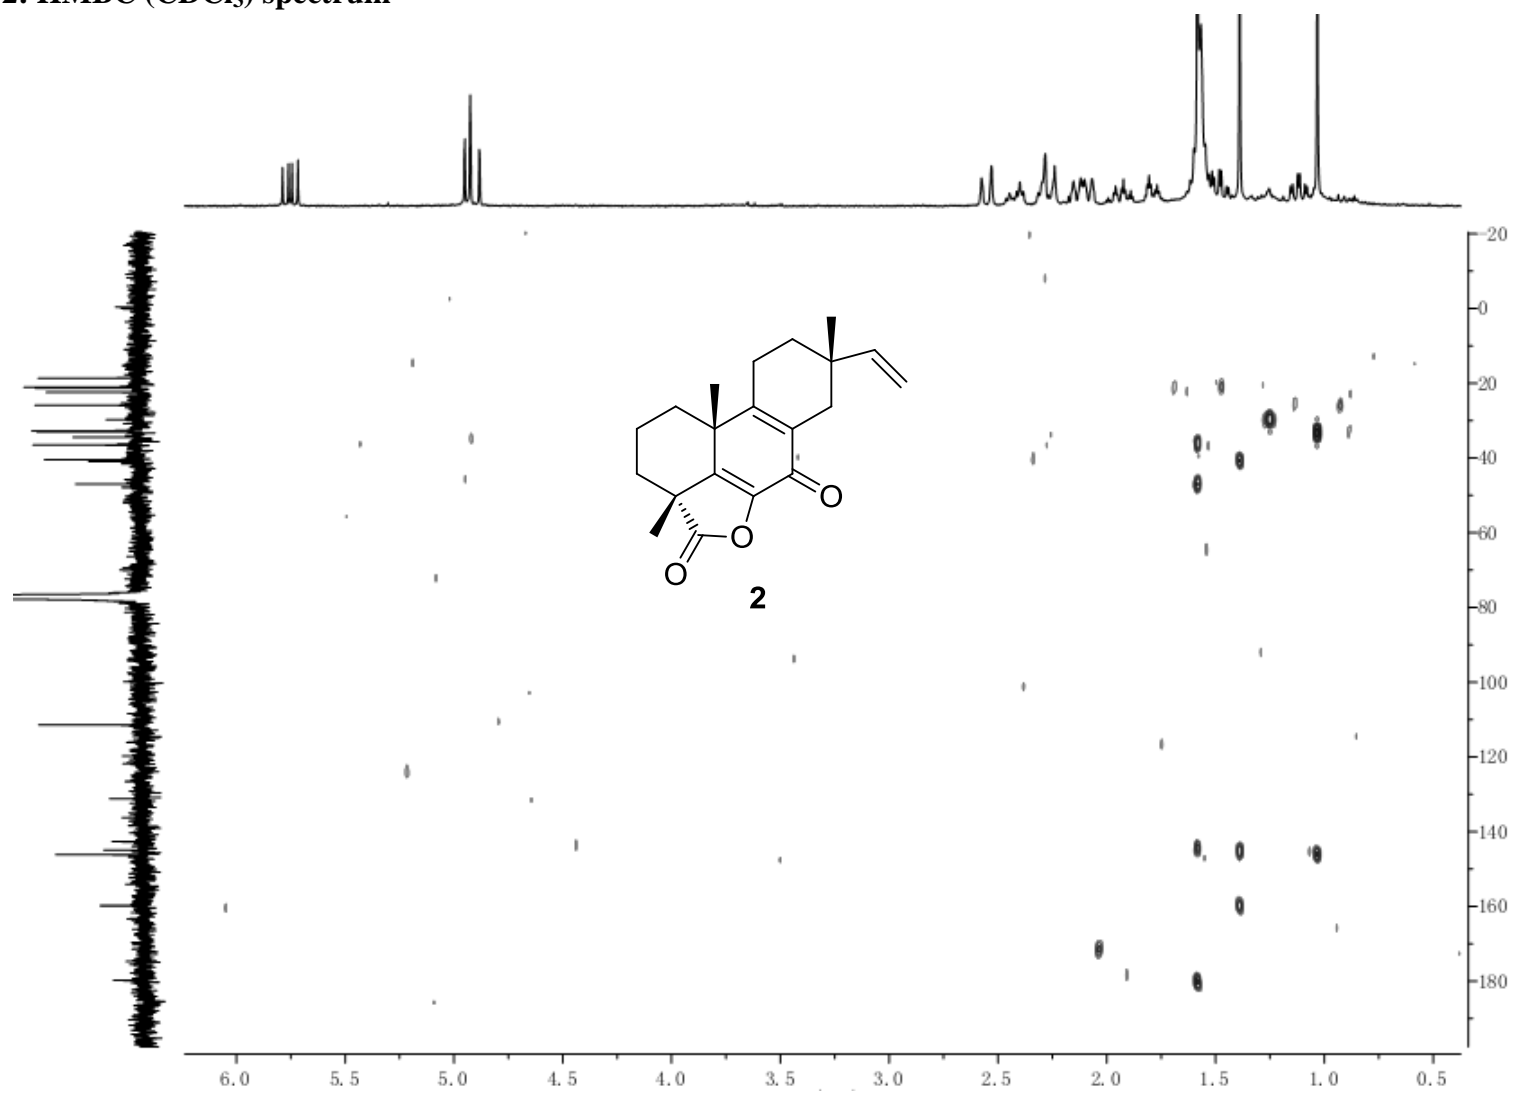

Compound 2: NOESY (CDCl<sub>3</sub>) spectrum

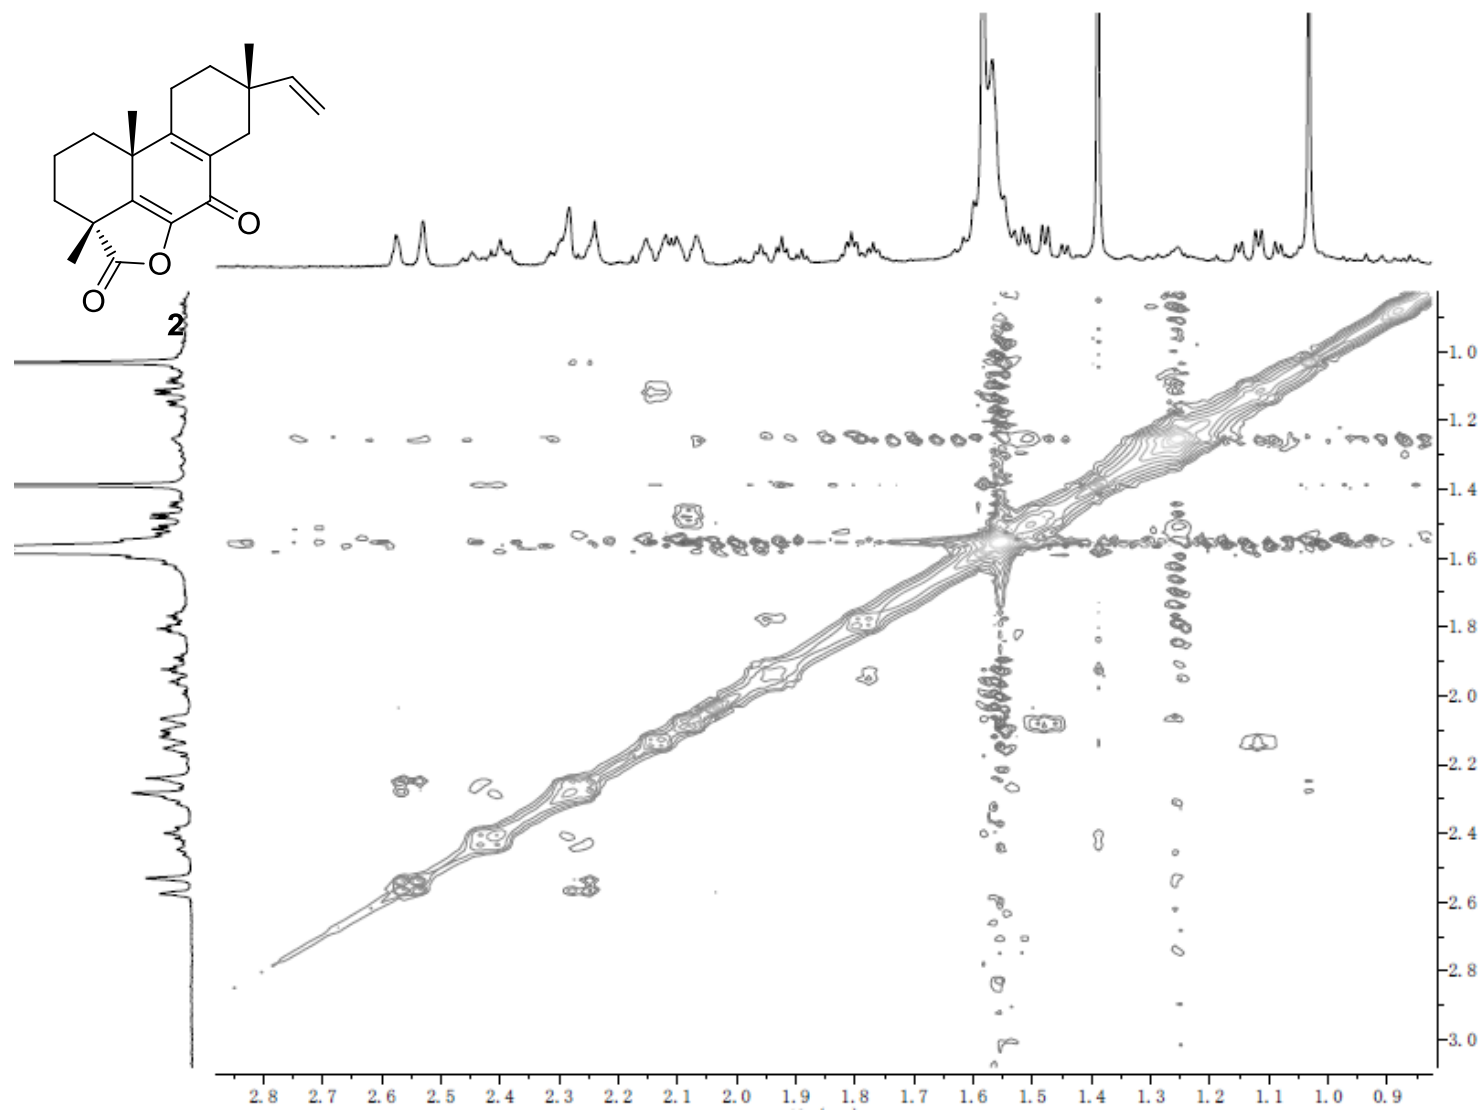

## Compound 2: (+) HR-ESIMS

### Qualitative Analysis Report

|                               |                  |                      |                       |
|-------------------------------|------------------|----------------------|-----------------------|
| <b>Data Filename</b>          | WZS13.d          | <b>Sample Name</b>   | WZS13                 |
| <b>Sample Type</b>            | Sample           | <b>Position</b>      | P1-D1                 |
| <b>Instrument Name</b>        | Instrument 1     | <b>User Name</b>     |                       |
| <b>Acq Method</b>             | general test 2.m | <b>Acquired Time</b> | 12/19/2013 2:19:55 PM |
| <b>IRM Calibration Status</b> | Some Ions Missed | <b>DA Method</b>     | Screening-Default.m   |
| <b>Comment</b>                |                  |                      |                       |

#### User Spectra

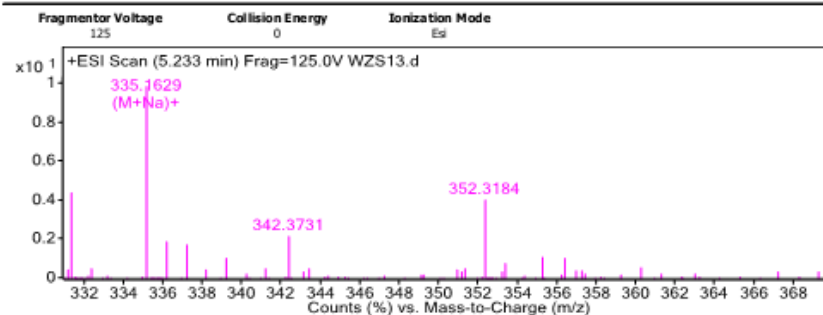

#### Peak List

| m/z     | z | Abund  |
|---------|---|--------|
| 330.338 | 1 | 569502 |

#### Formula Calculator Element Limits

| Element | Min | Max |
|---------|-----|-----|
| C       | 3   | 60  |
| H       | 0   | 120 |
| O       | 0   | 30  |
| N       | 0   | 1   |
| S       | 0   | 0   |
| Cl      | 0   | 0   |
| Br      | 0   | 0   |
| Si      | 0   | 0   |

#### Formula Calculator Results

| Formula    | Best | Mass     | Tgt Mass | Diff (ppm) | Ion Species   | Score |
|------------|------|----------|----------|------------|---------------|-------|
| C20 H24 O3 | TRUE | 312.1738 | 312.1725 | -3.9       | C20 H24 Na O3 | 60.39 |

--- End Of Report ---

Compound 3:  $^1\text{H}$  NMR ( $\text{CDCl}_3$ ) spectrum

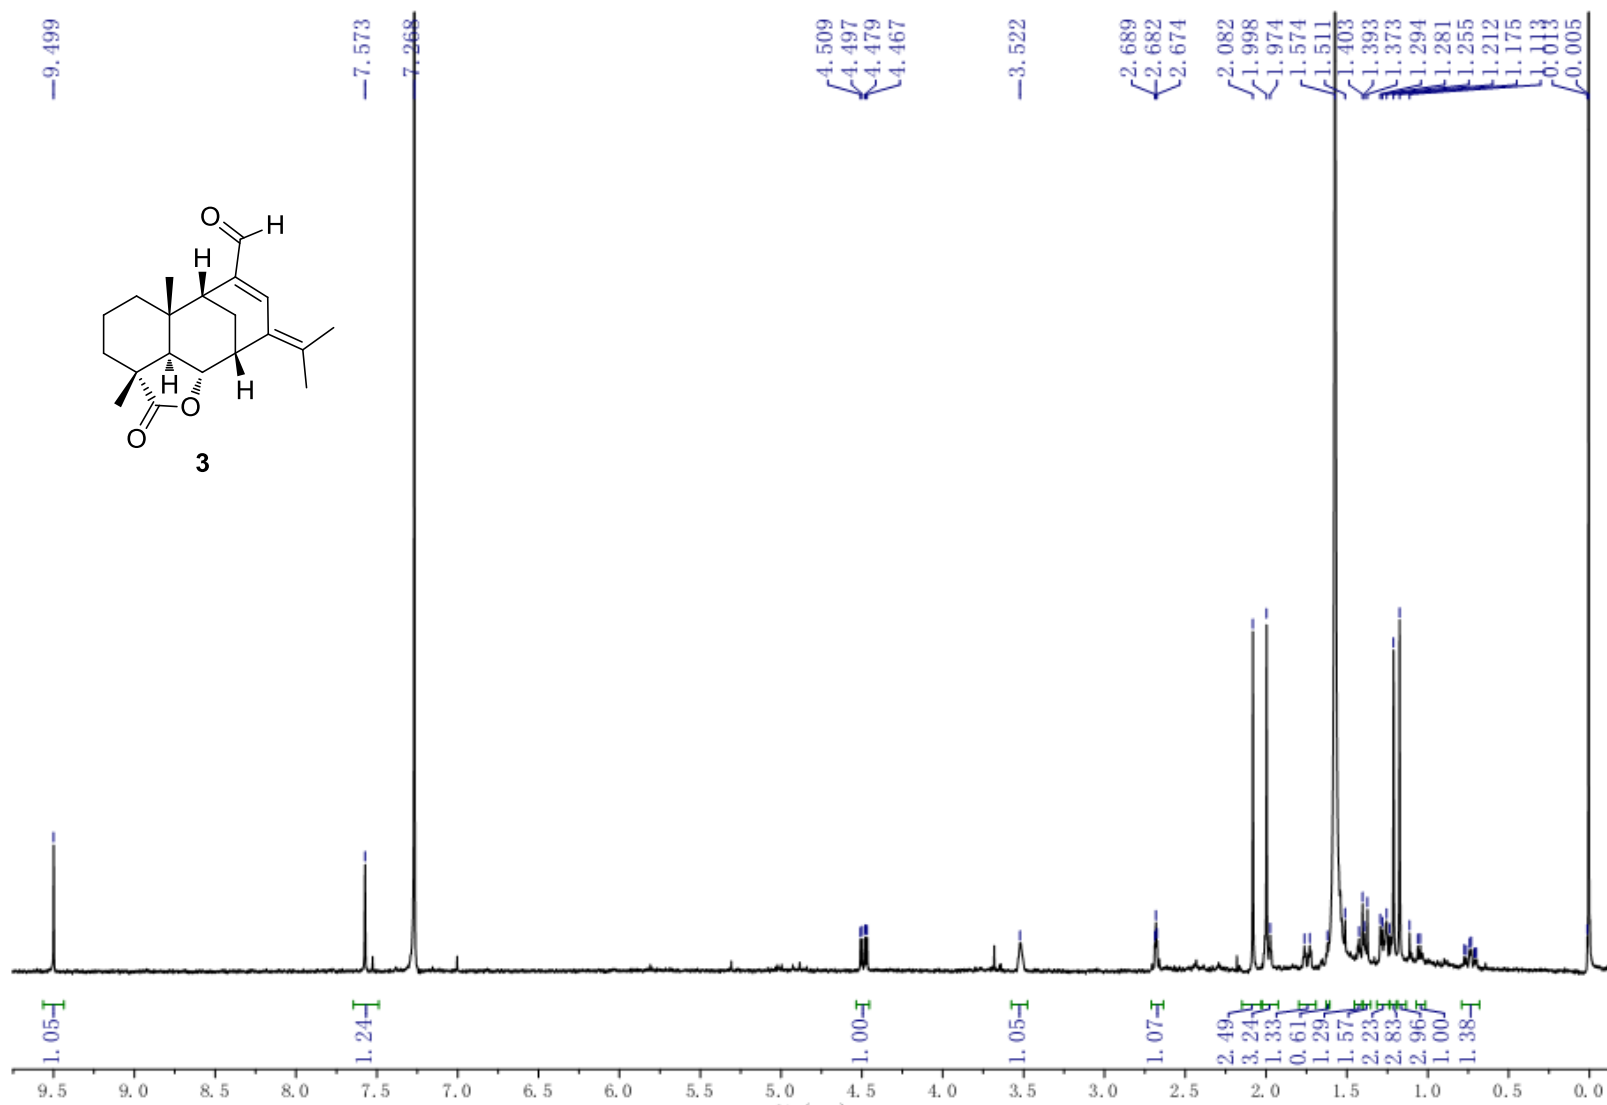

### Compound 3: $^1\text{H}$ NMR ( $\text{CDCl}_3$ ) spectrum-Expansion

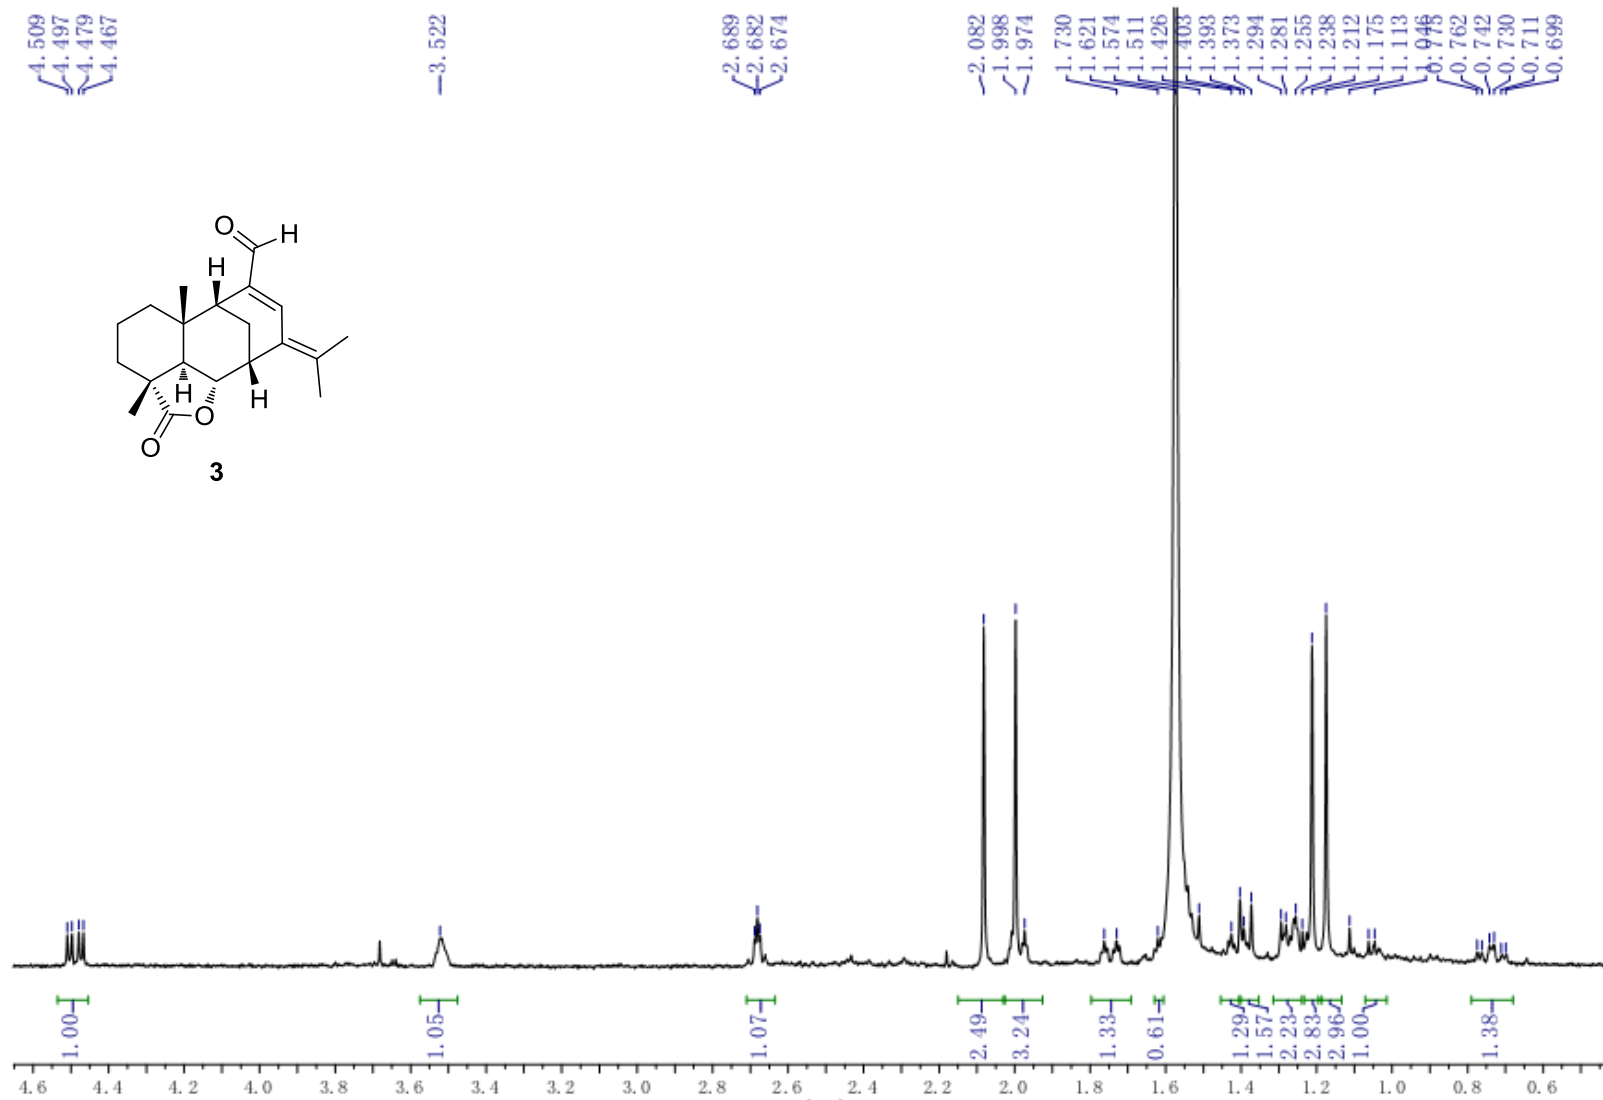

Compound 3:  $^{13}\text{C}$  NMR and DEPT ( $\text{CDCl}_3$ ) spectrum

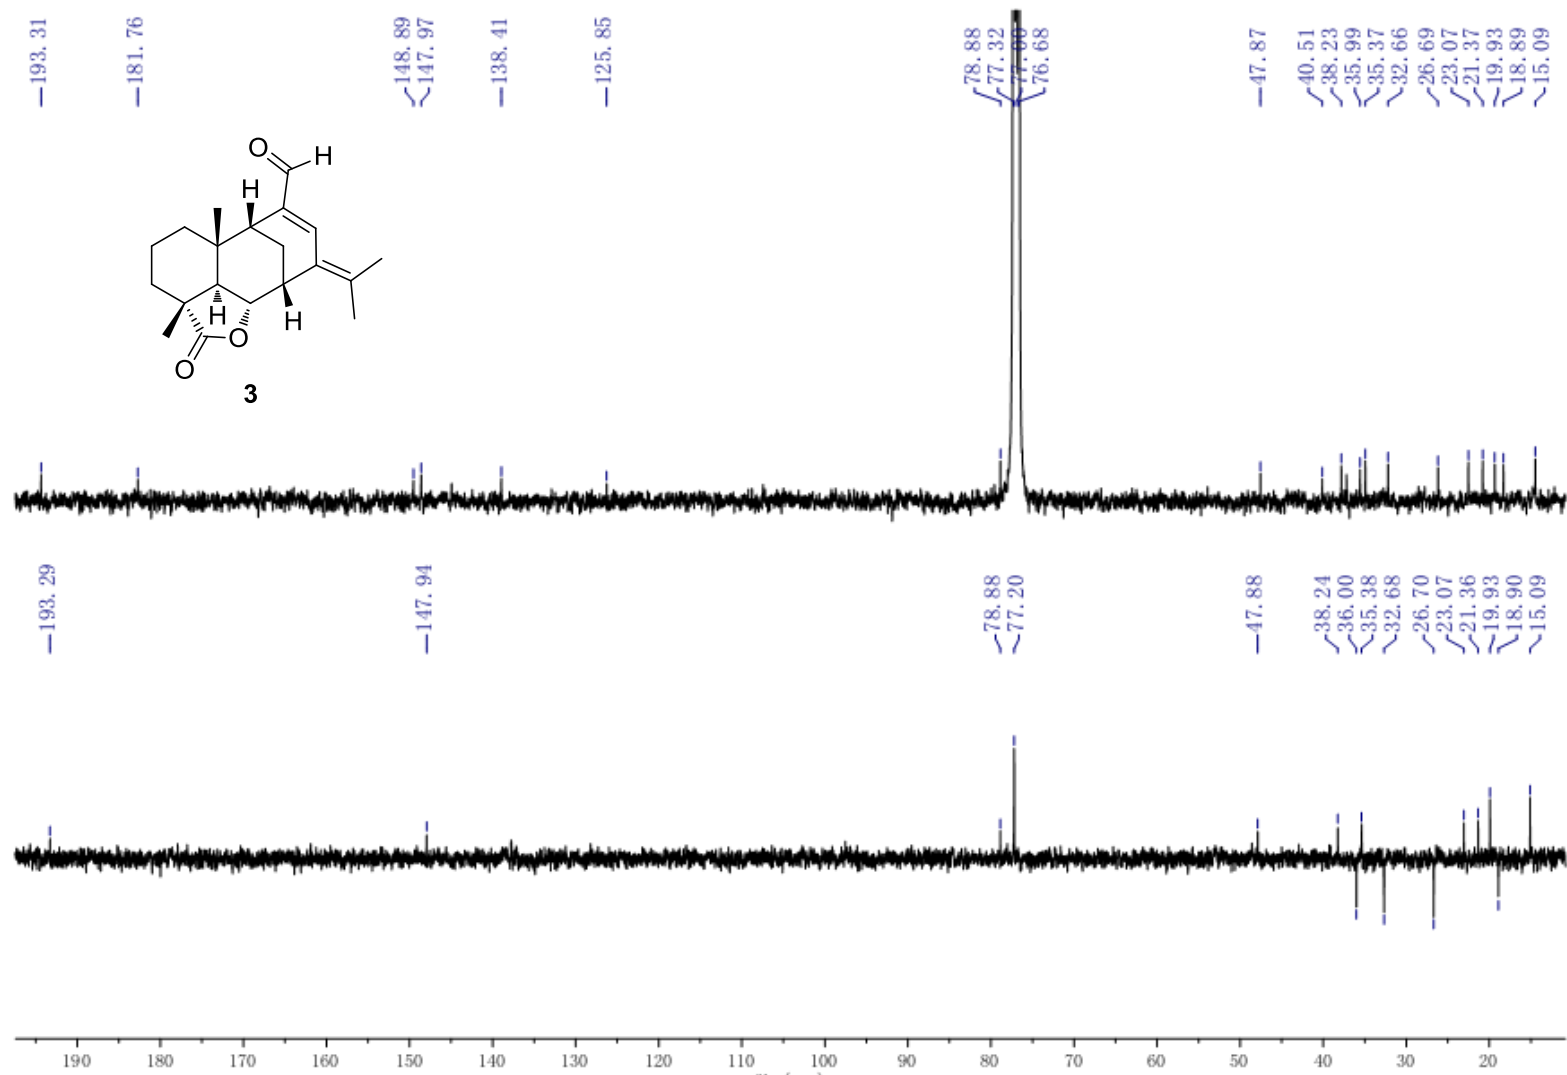

**Compound 3: HSQC (CDCl<sub>3</sub>) spectrum**

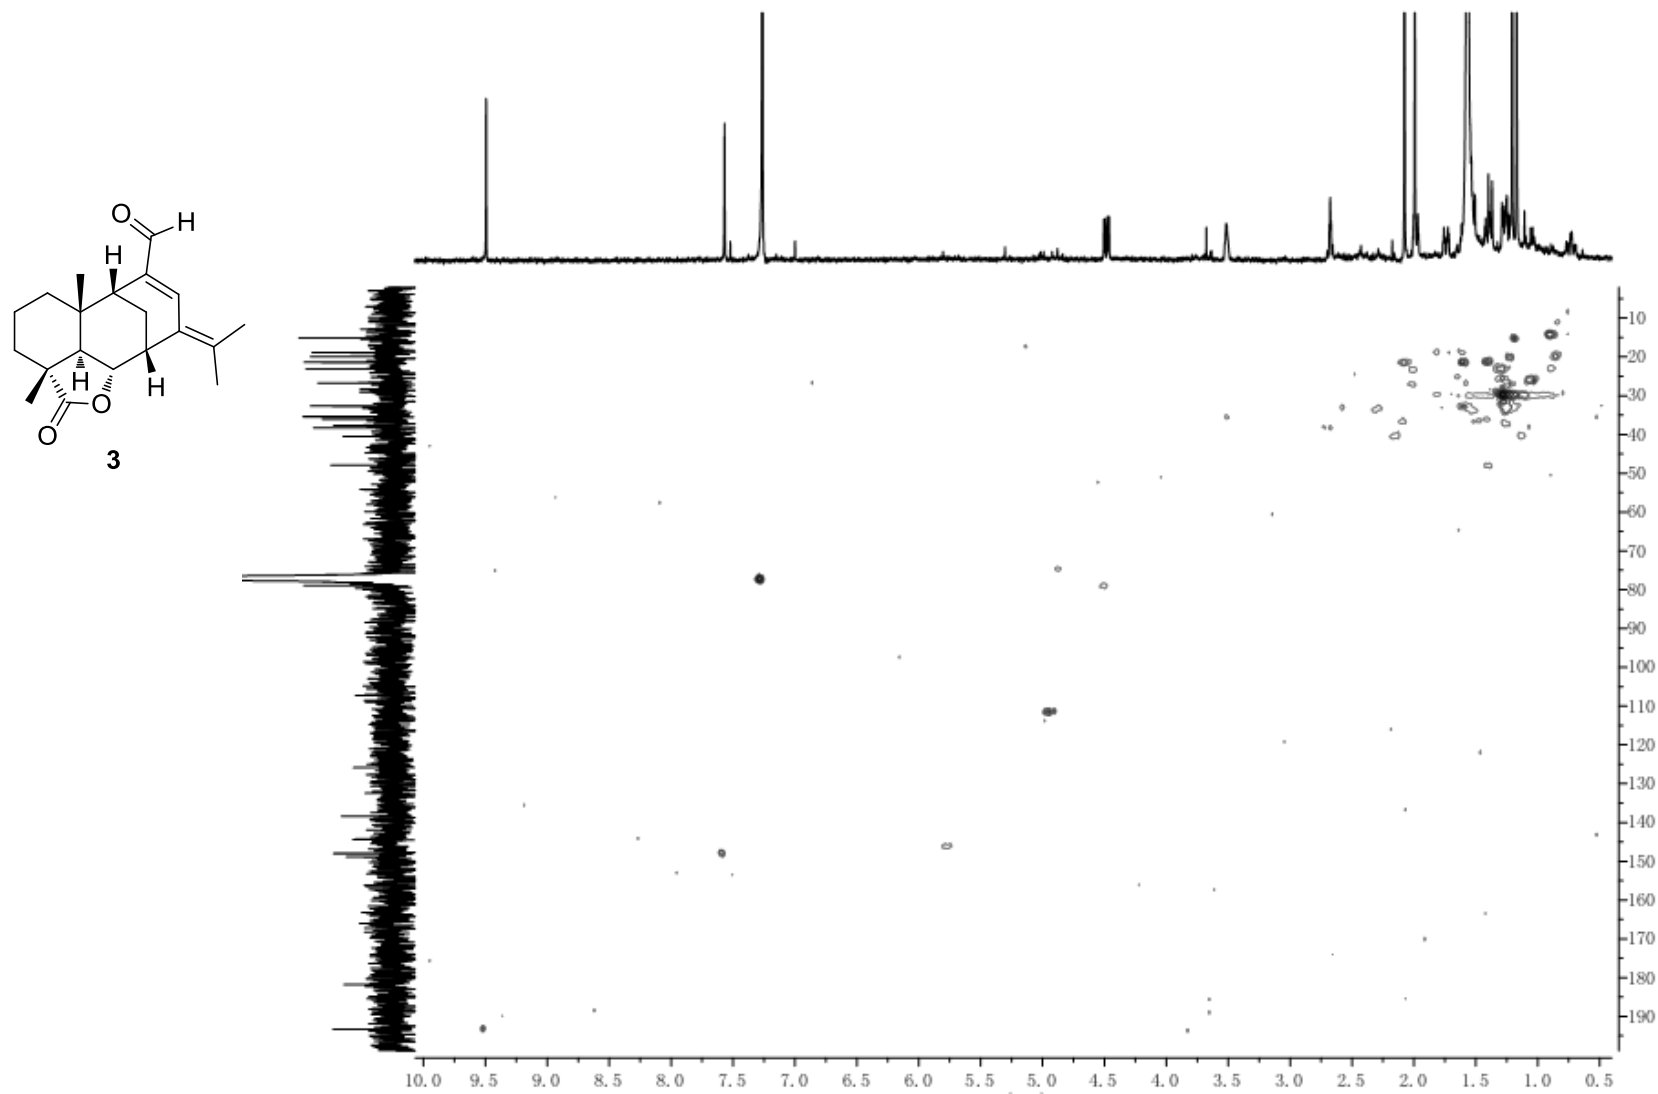



Compound 3:  $^1\text{H}$ - $^1\text{H}$  COSY ( $\text{CDCl}_3$ ) spectrum

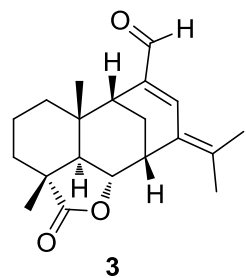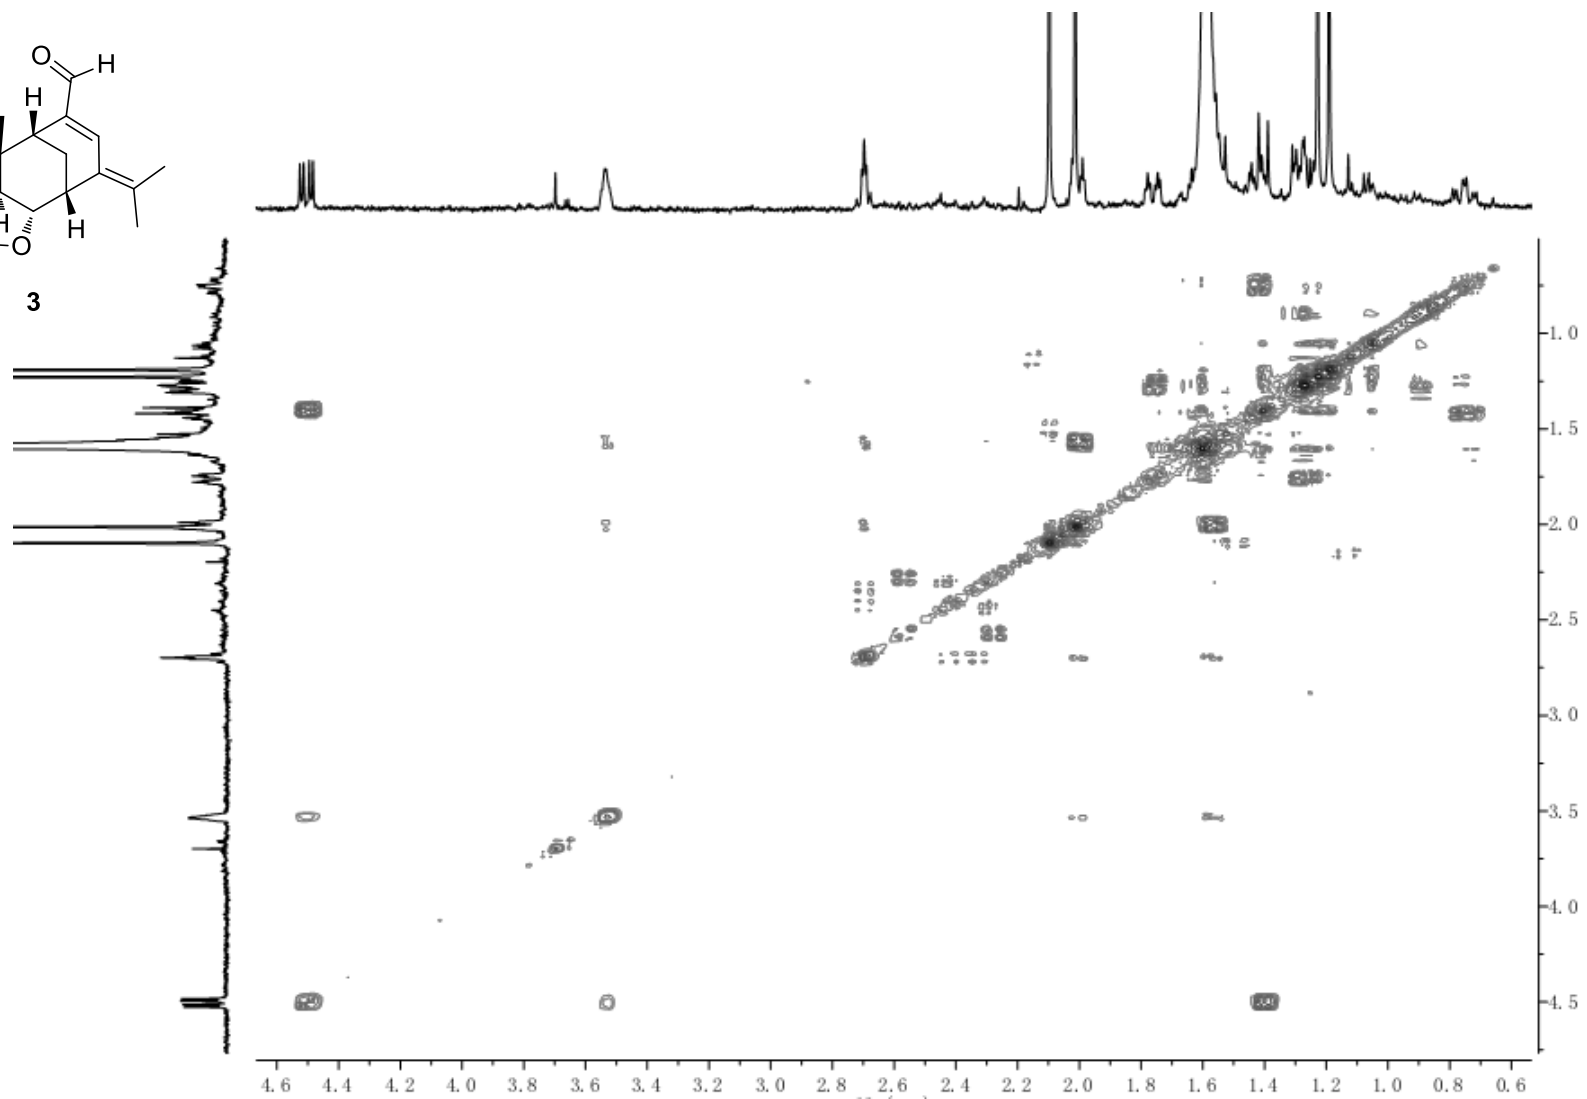

**Compound 3: HMBC (CDCl<sub>3</sub>) spectrum**

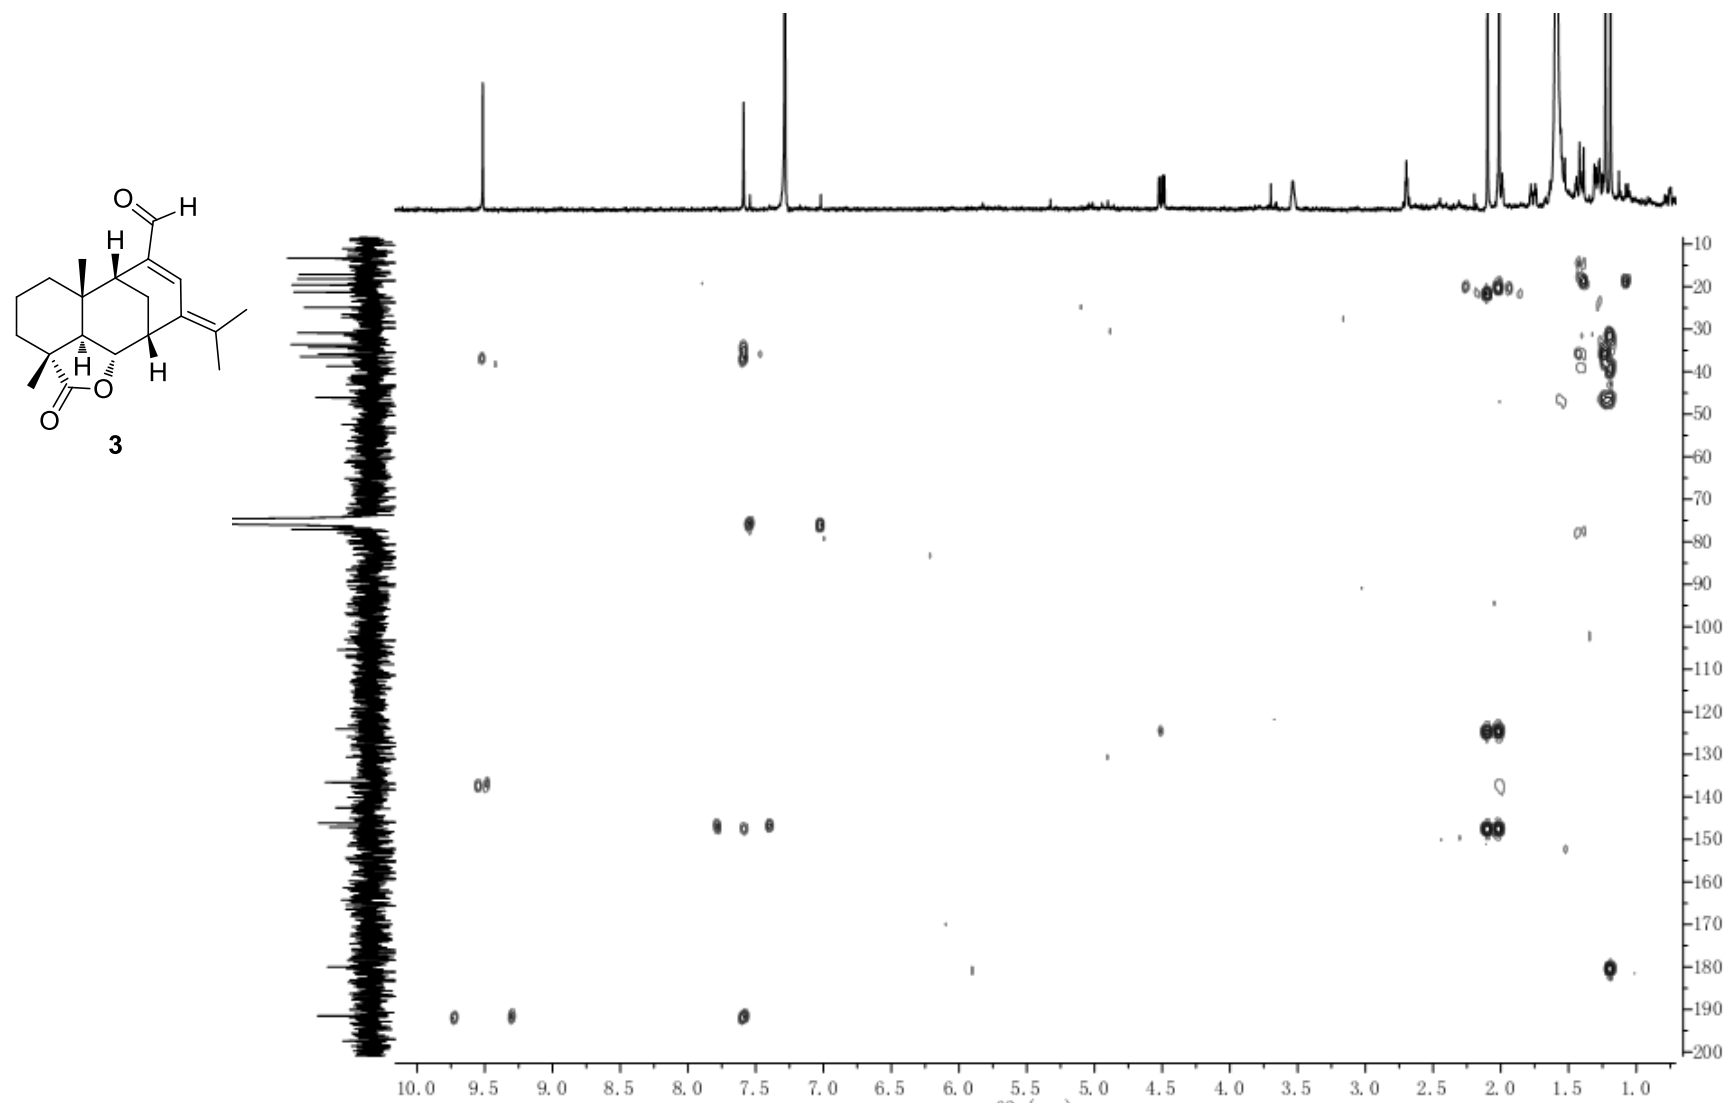

**Compound 3: NOESY (CDCl<sub>3</sub>) spectrum**

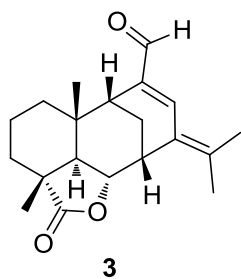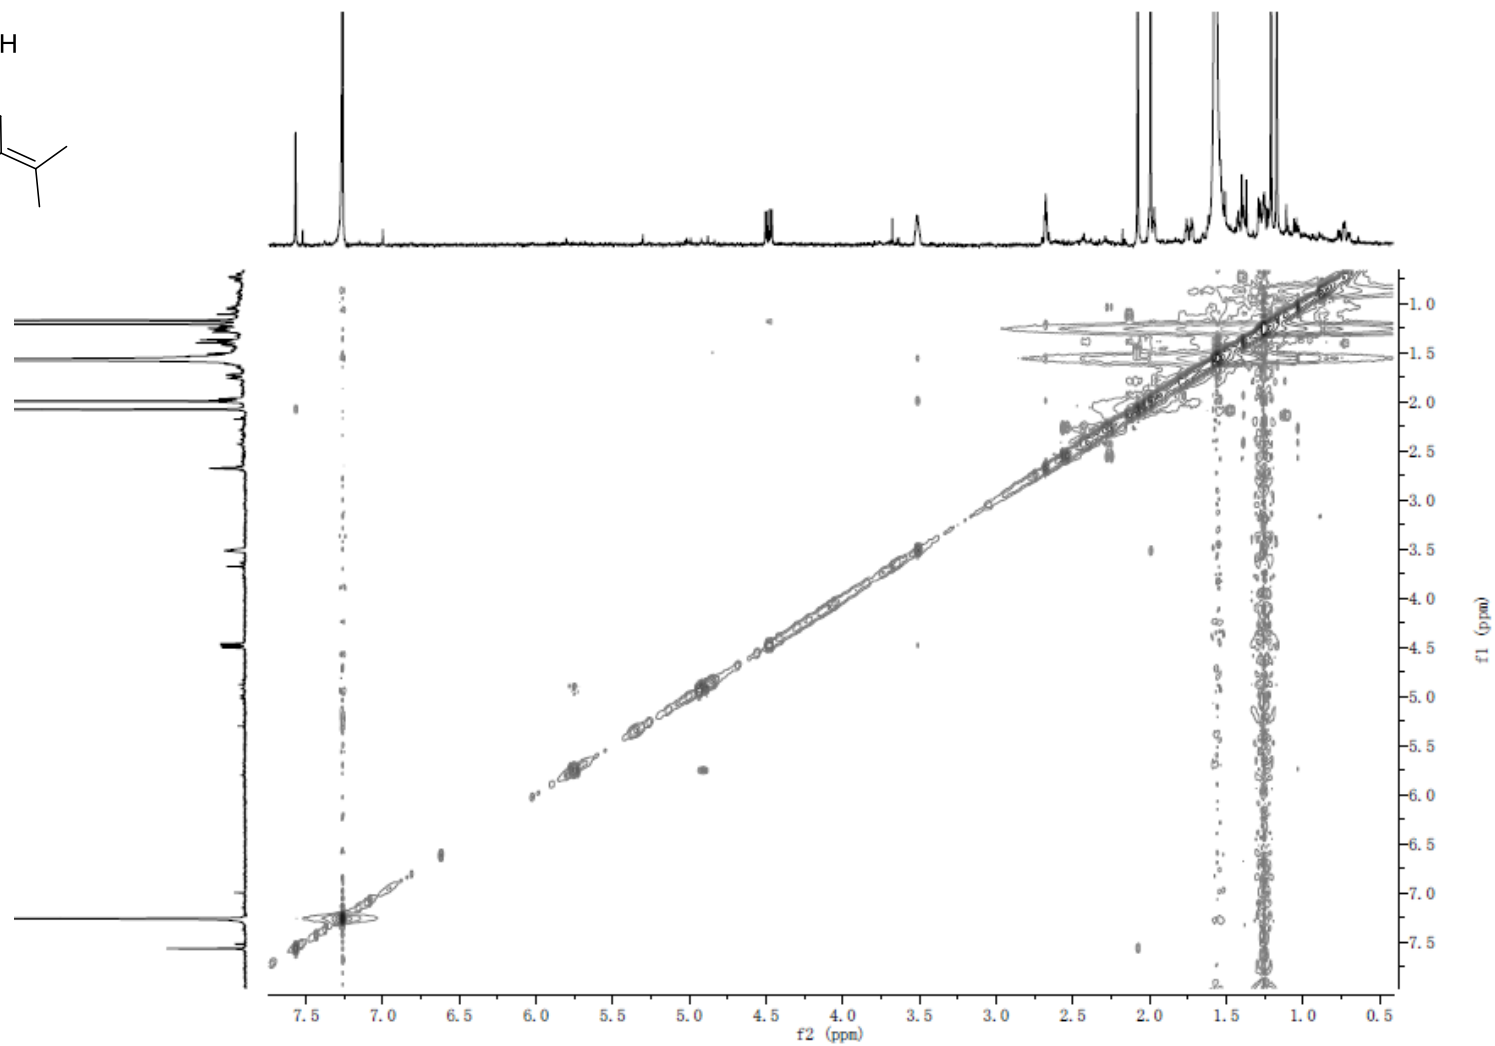

**Compound 3: NOESY (CDCl<sub>3</sub>) spectrum-Expansion**

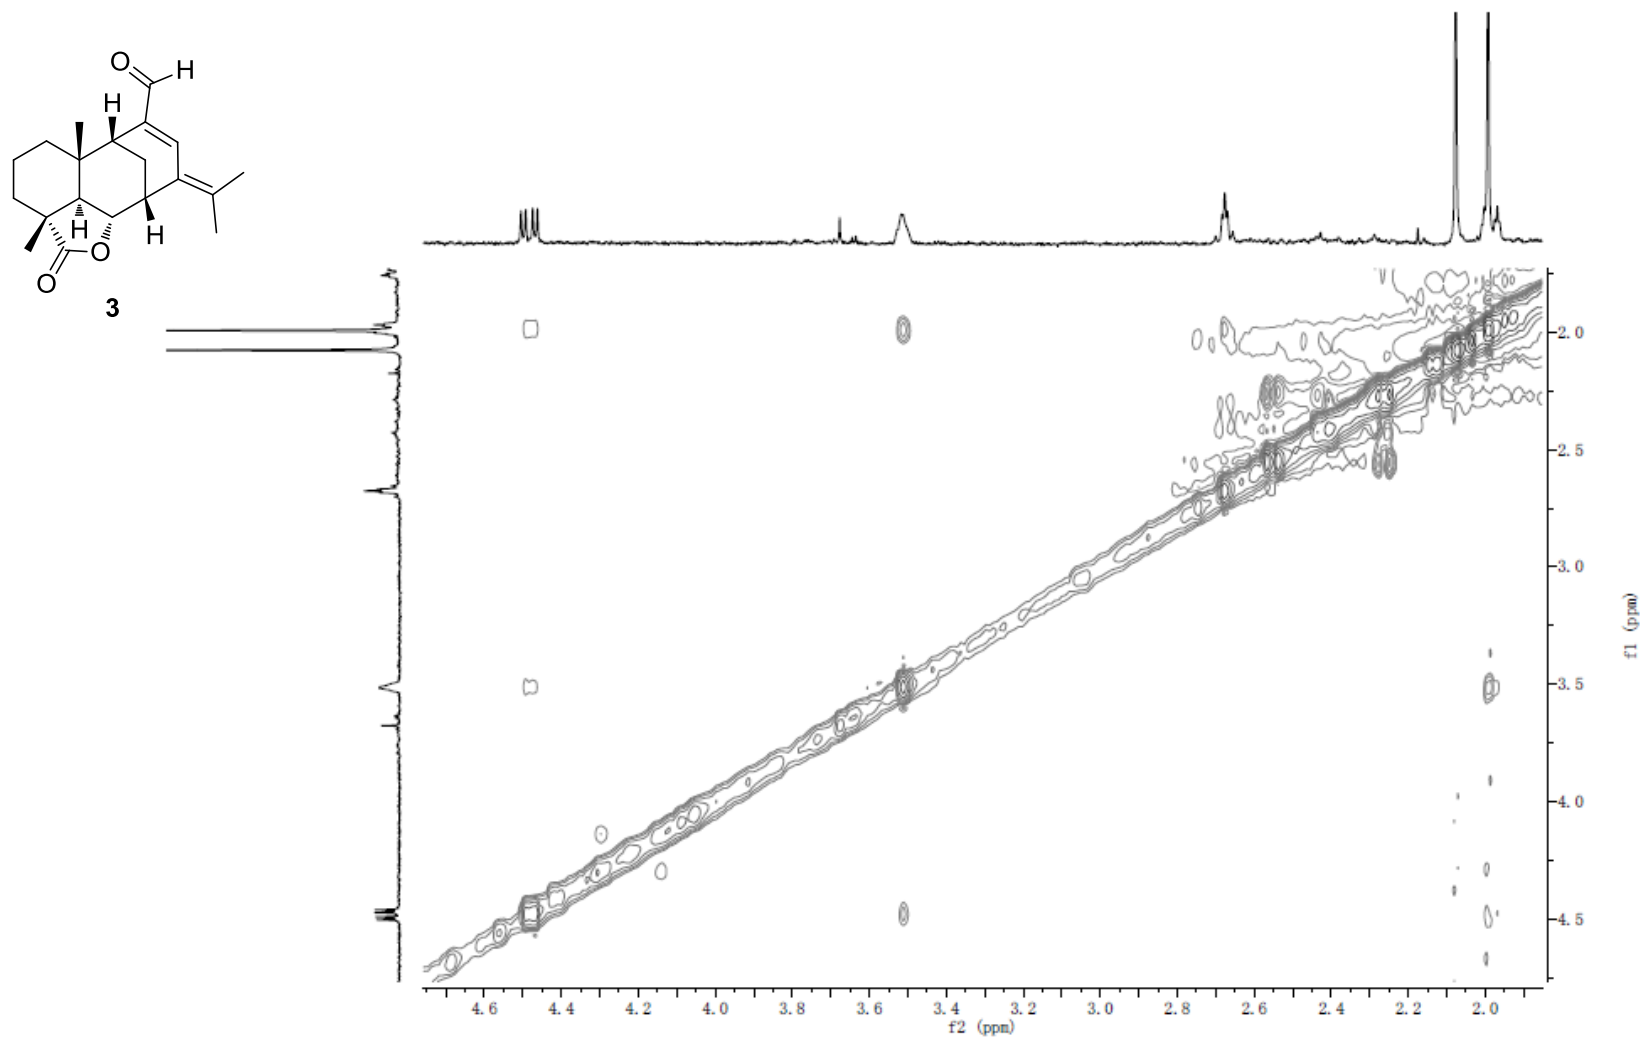

## Compound 3: (+) HR-ESIMS

### Qualitative Analysis Report

|                               |                  |                      |                       |
|-------------------------------|------------------|----------------------|-----------------------|
| <b>Data Filename</b>          | WZS14.d          | <b>Sample Name</b>   | WZS14                 |
| <b>Sample Type</b>            | Sample           | <b>Position</b>      | P1-D2                 |
| <b>Instrument Name</b>        | Instrument 1     | <b>User Name</b>     |                       |
| <b>Acq Method</b>             | general test 2.m | <b>Acquired Time</b> | 12/19/2013 2:27:43 PM |
| <b>IRM Calibration Status</b> | Some Ions Missed | <b>DA Method</b>     | Screening-Default.m   |
| <b>Comment</b>                |                  |                      |                       |

#### User Spectra

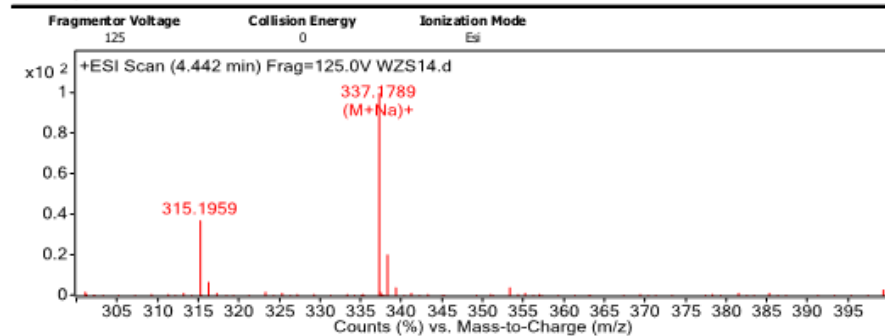

#### Peak List

| m/z      | z | Abund  | Formula       | Ion     |
|----------|---|--------|---------------|---------|
| 337.1789 | 1 | 784110 | C20 H26 Na O3 | (M+Na)+ |

#### Formula Calculator Element Limits

| Element | Min | Max |
|---------|-----|-----|
| C       | 3   | 60  |
| H       | 0   | 120 |
| O       | 0   | 30  |
| N       | 0   | 1   |
| S       | 0   | 0   |
| Cl      | 0   | 0   |
| Br      | 0   | 0   |
| Si      | 0   | 0   |

#### Formula Calculator Results

| Formula    | Best | Mass     | Tgt Mass | Diff (ppm) | Ion Species   | Score |
|------------|------|----------|----------|------------|---------------|-------|
| C20 H26 O3 | TRUE | 314.1897 | 314.1882 | -4.64      | C20 H26 Na O3 | 85.15 |

-- End Of Report --

Compound 4:  $^1\text{H}$  NMR ( $\text{CDCl}_3$ ) spectrum

7.268  
7.152

5.138

4.797  
4.748

4.449

2.418  
2.229  
2.196  
2.152  
2.125  
1.902  
1.881  
1.818  
1.787  
1.655  
1.605  
1.562  
1.251  
1.238  
1.222  
1.113

0.597

0.005

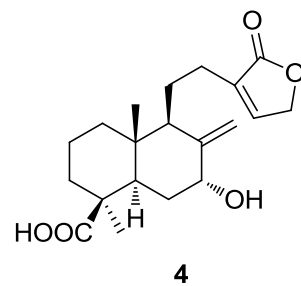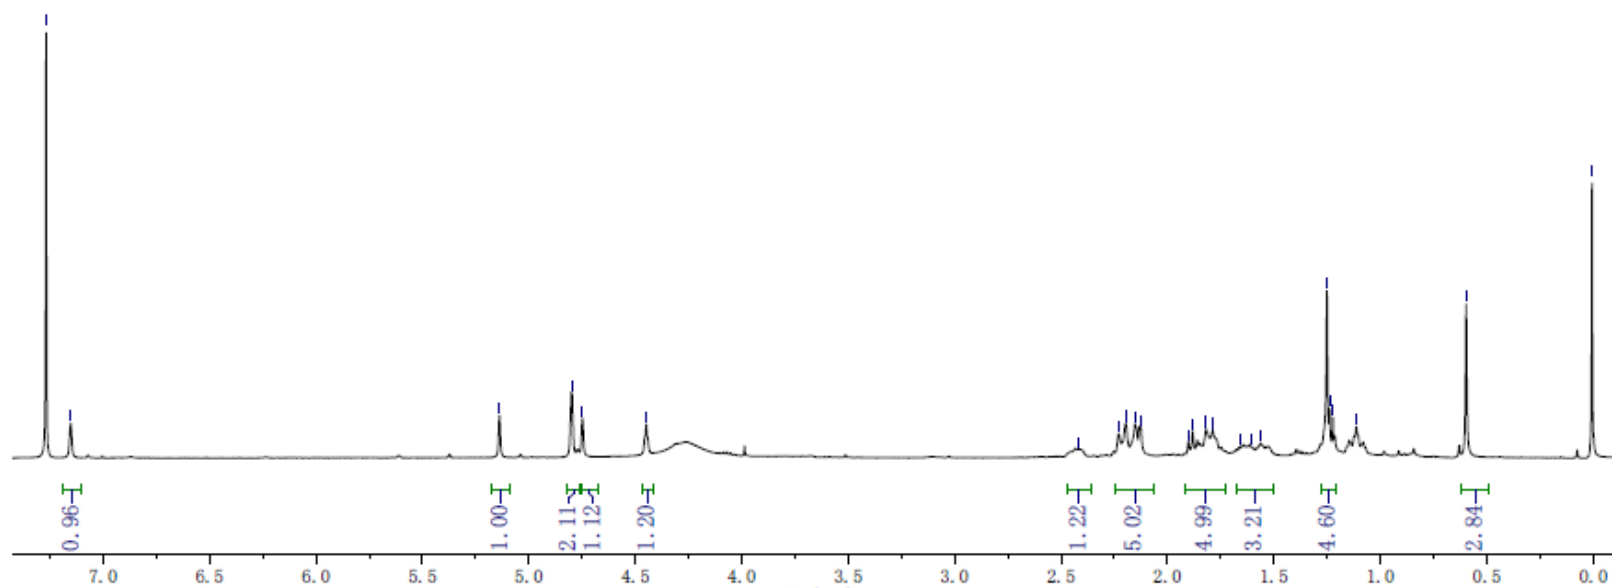

Compound 4:  $^{13}\text{C}$  NMR and DEPT ( $\text{CDCl}_3$ ) spectrum

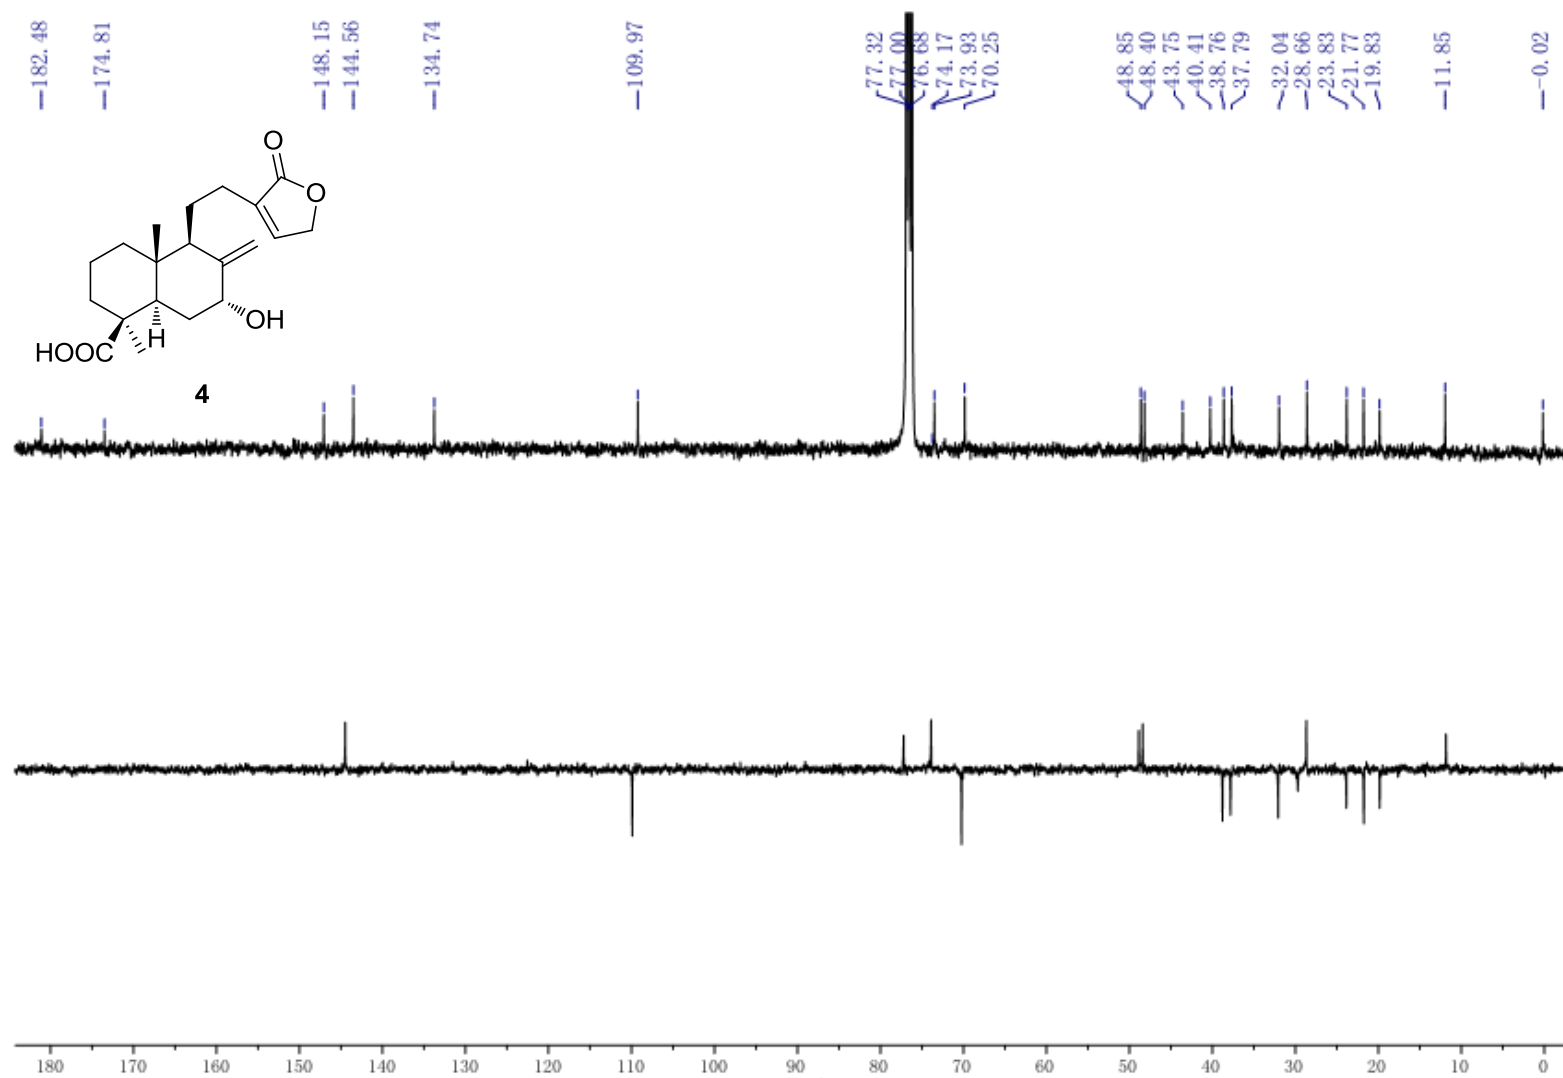

Compound 4: HSQC (CDCl<sub>3</sub>) spectrum

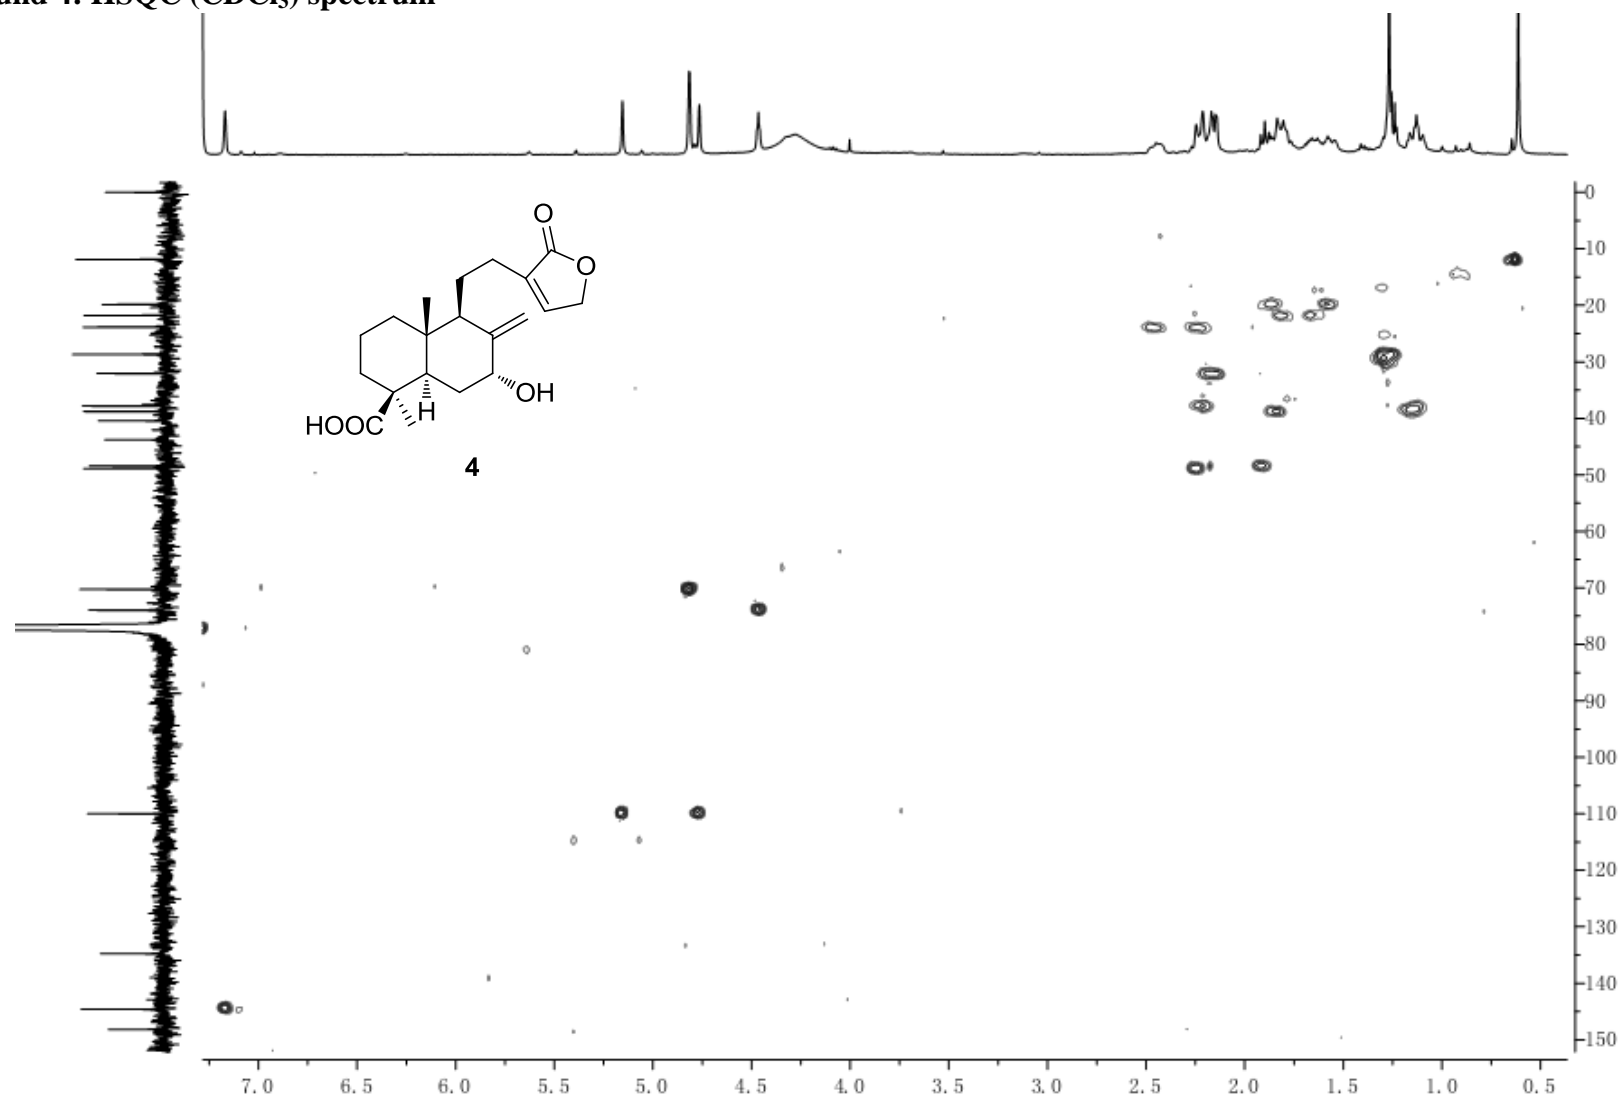



Compound 4:  $^1\text{H}$ - $^1\text{H}$  COSY ( $\text{CDCl}_3$ ) spectrum

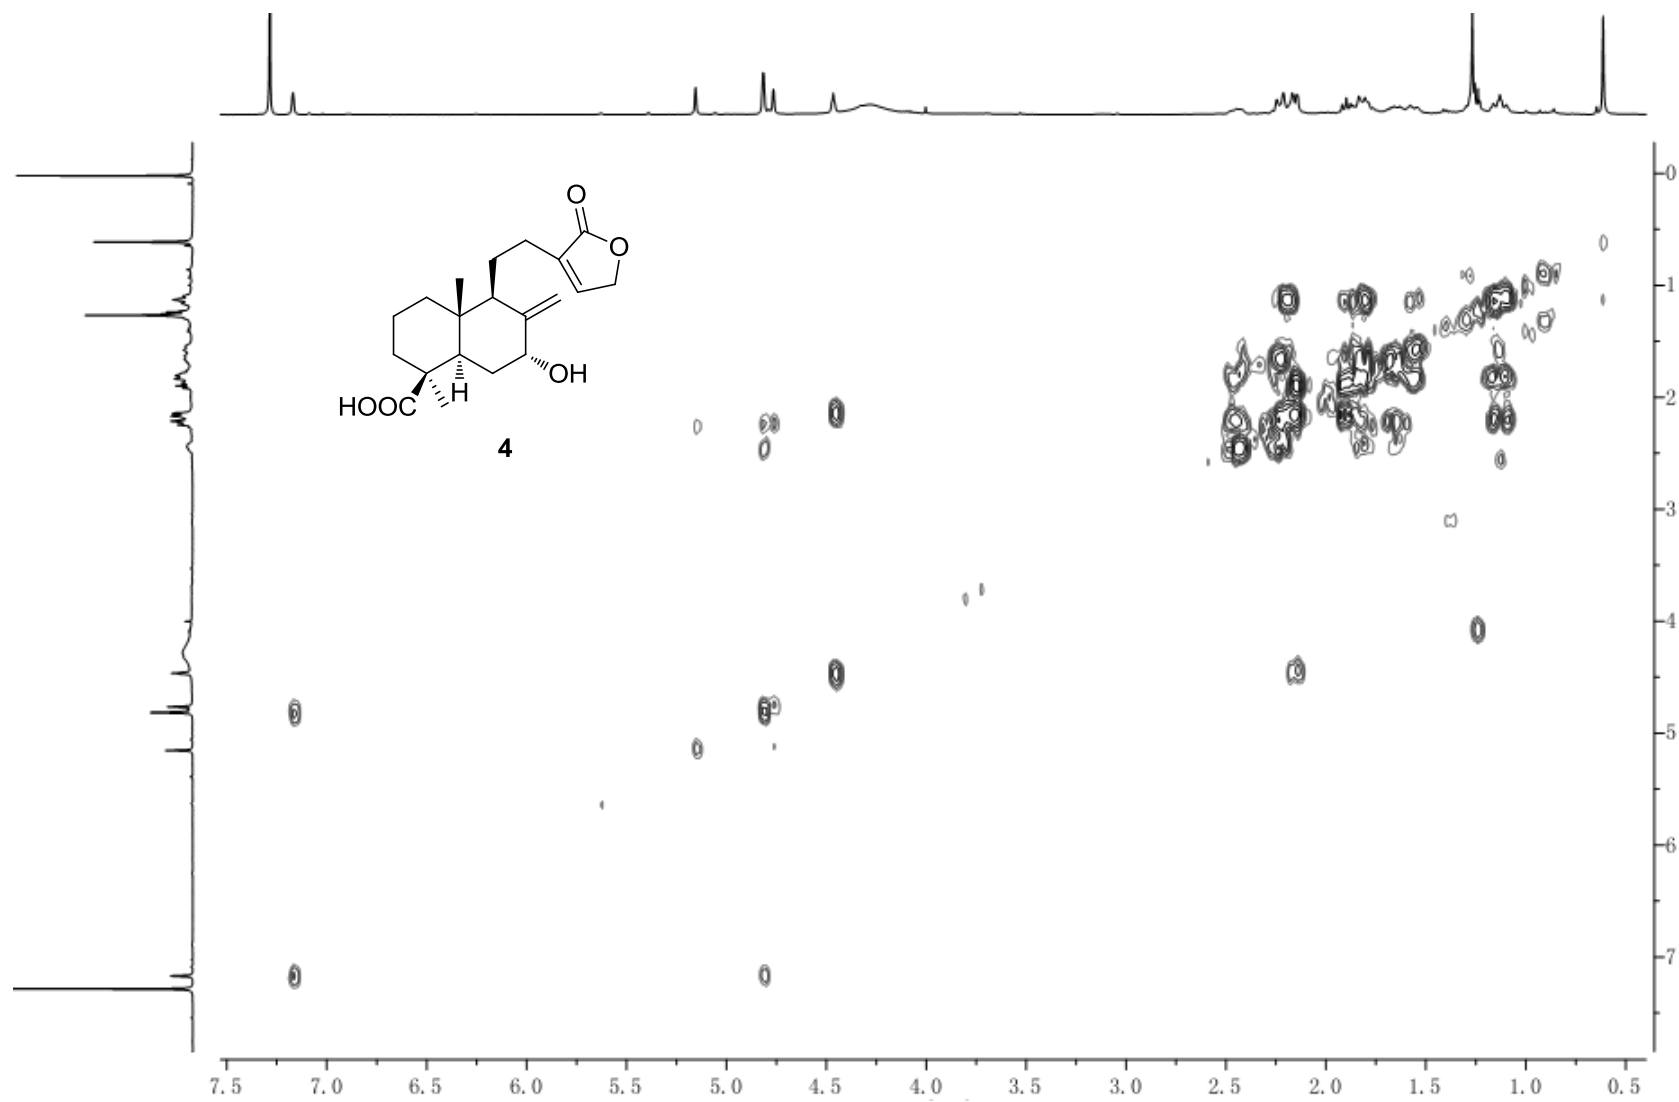

Compound 4: HMBC (CDCl<sub>3</sub>) spectrum

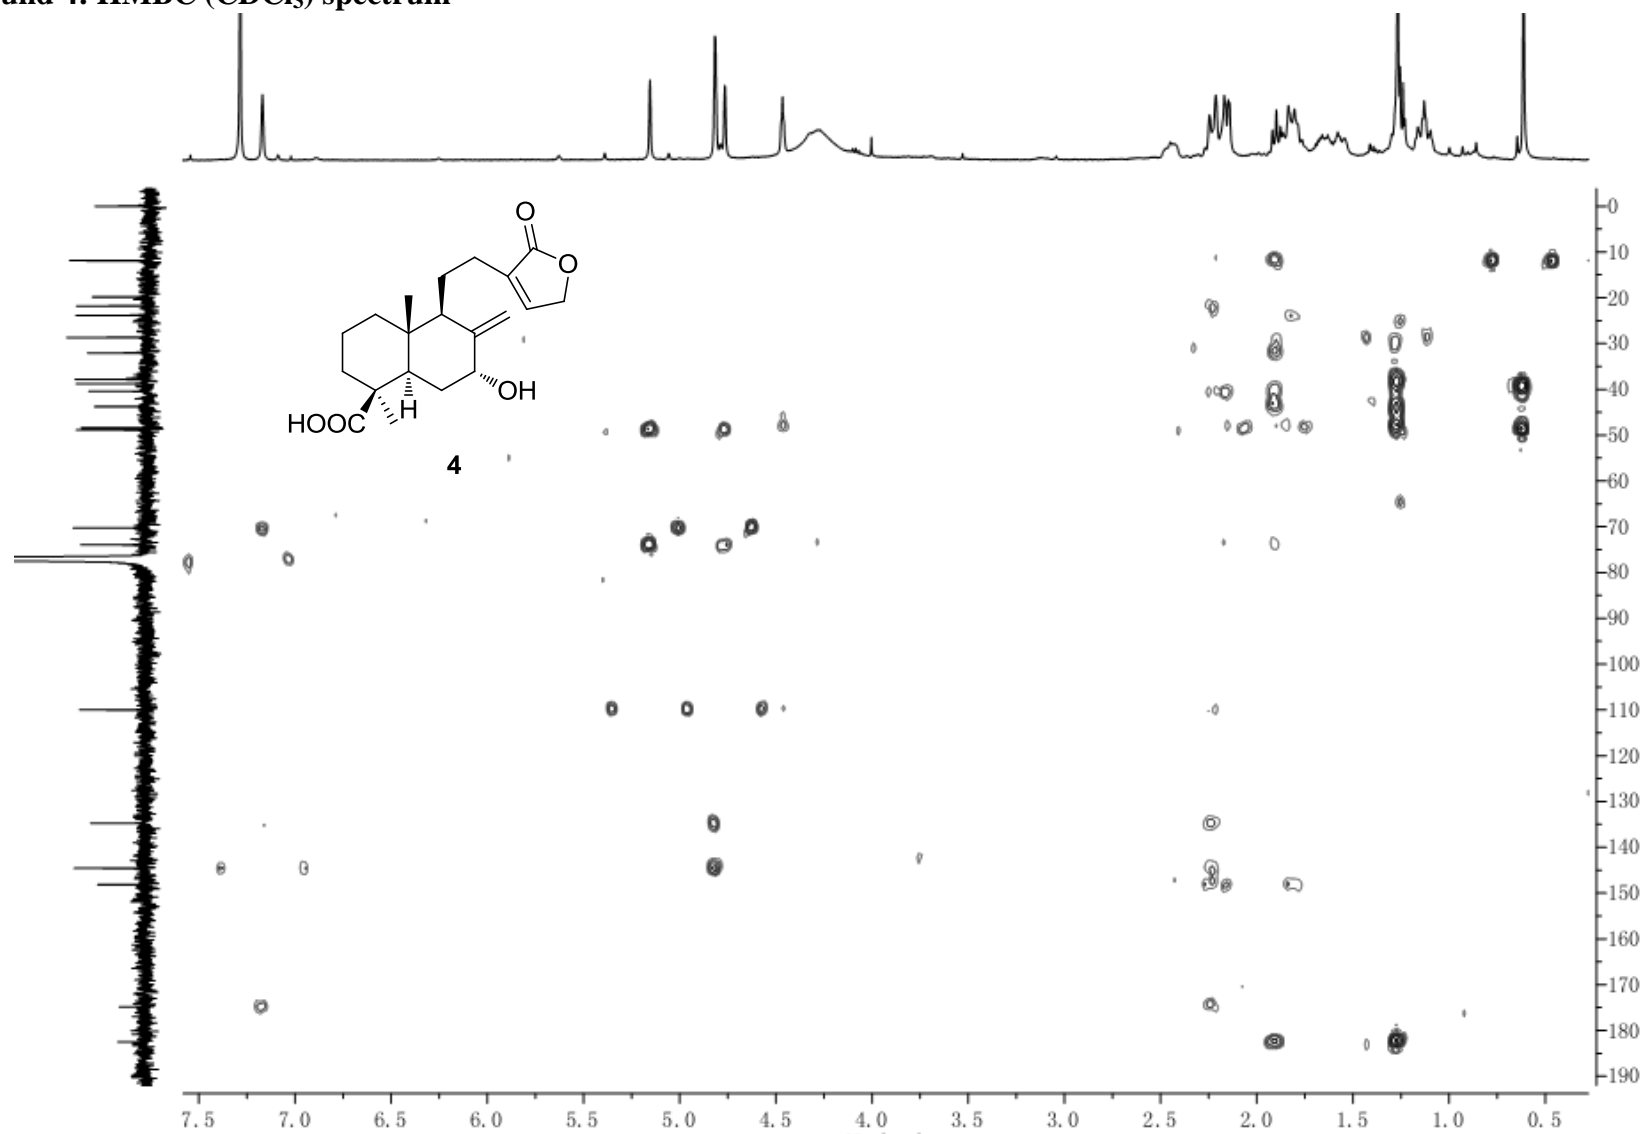

Compound 4: NOESY (CDCl<sub>3</sub>) spectrum

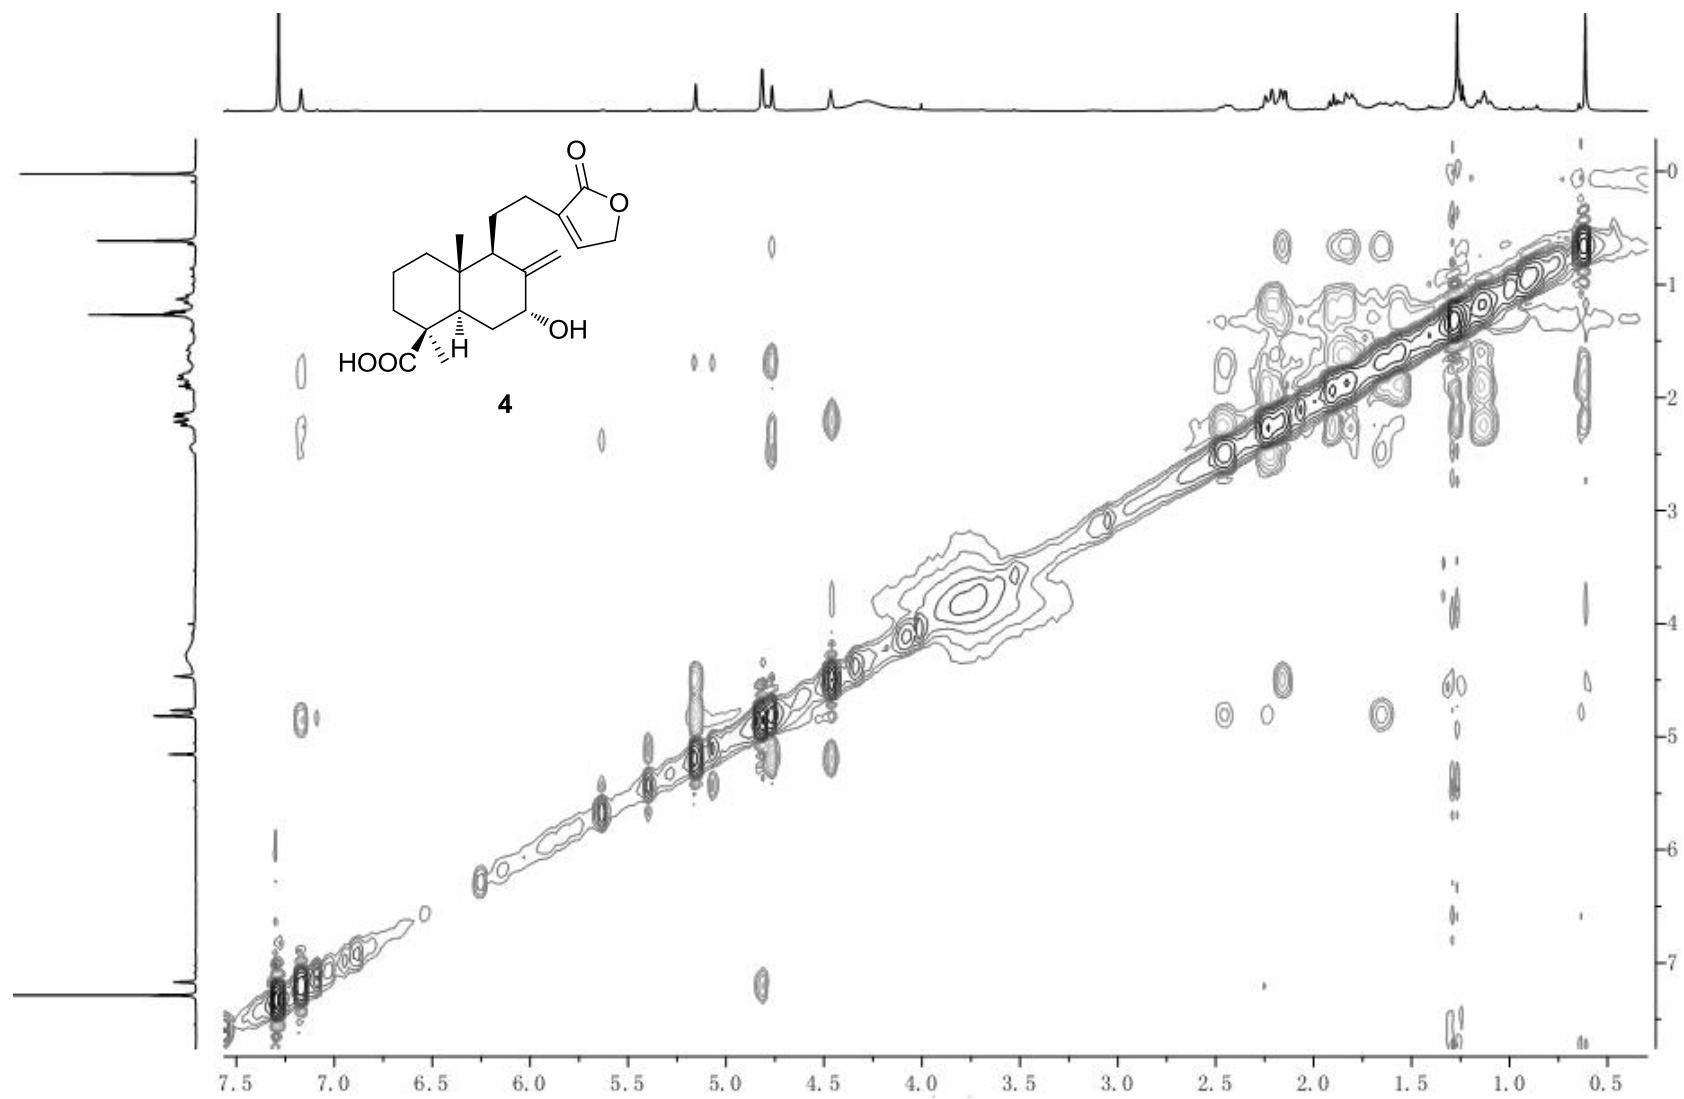

## Compound 4: (+) HR-ESIMS

### Qualitative Analysis Report

|                               |                  |                      |                       |
|-------------------------------|------------------|----------------------|-----------------------|
| <b>Data Filename</b>          | WZS55.d          | <b>Sample Name</b>   | WZS55                 |
| <b>Sample Type</b>            | Sample           | <b>Position</b>      | P1-D6                 |
| <b>Instrument Name</b>        | Instrument 1     | <b>User Name</b>     |                       |
| <b>Acq Method</b>             | general test 2.m | <b>Acquired Time</b> | 12/19/2013 2:59:00 PM |
| <b>IRM Calibration Status</b> | Some Ions Missed | <b>DA Method</b>     | Screening-Default.m   |
| <b>Comment</b>                |                  |                      |                       |

#### User Spectra

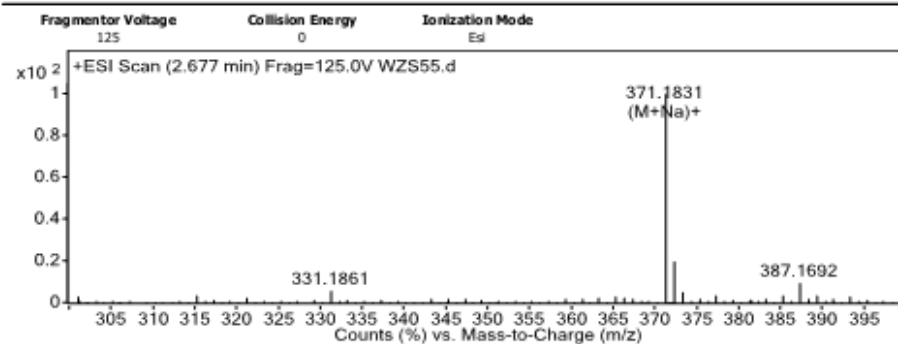

#### Peak List

| m/z      | z | Abund  | Formula                                          | Ion                 |
|----------|---|--------|--------------------------------------------------|---------------------|
| 371.1831 | 1 | 332967 | C <sub>20</sub> H <sub>28</sub> NaO <sub>5</sub> | (M+Na) <sup>+</sup> |

#### Formula Calculator Element Limits

| Element | Min | Max |
|---------|-----|-----|
| C       | 3   | 60  |
| H       | 0   | 120 |
| O       | 0   | 30  |
| N       | 0   | 1   |
| S       | 0   | 0   |
| Cl      | 0   | 0   |
| Br      | 0   | 0   |
| Si      | 0   | 0   |

#### Formula Calculator Results

| Formula                                        | Best | Mass     | Tgt Mass | Diff (ppm) | Ion Species                                      | Score |
|------------------------------------------------|------|----------|----------|------------|--------------------------------------------------|-------|
| C <sub>20</sub> H <sub>28</sub> O <sub>5</sub> | TRUE | 348.1938 | 348.1937 | -0.47      | C <sub>20</sub> H <sub>28</sub> NaO <sub>5</sub> | 86.8  |

--- End Of Report ---

Compound 5:  $^1\text{H}$  NMR ( $\text{CD}_3\text{OD}$ ) spectrum

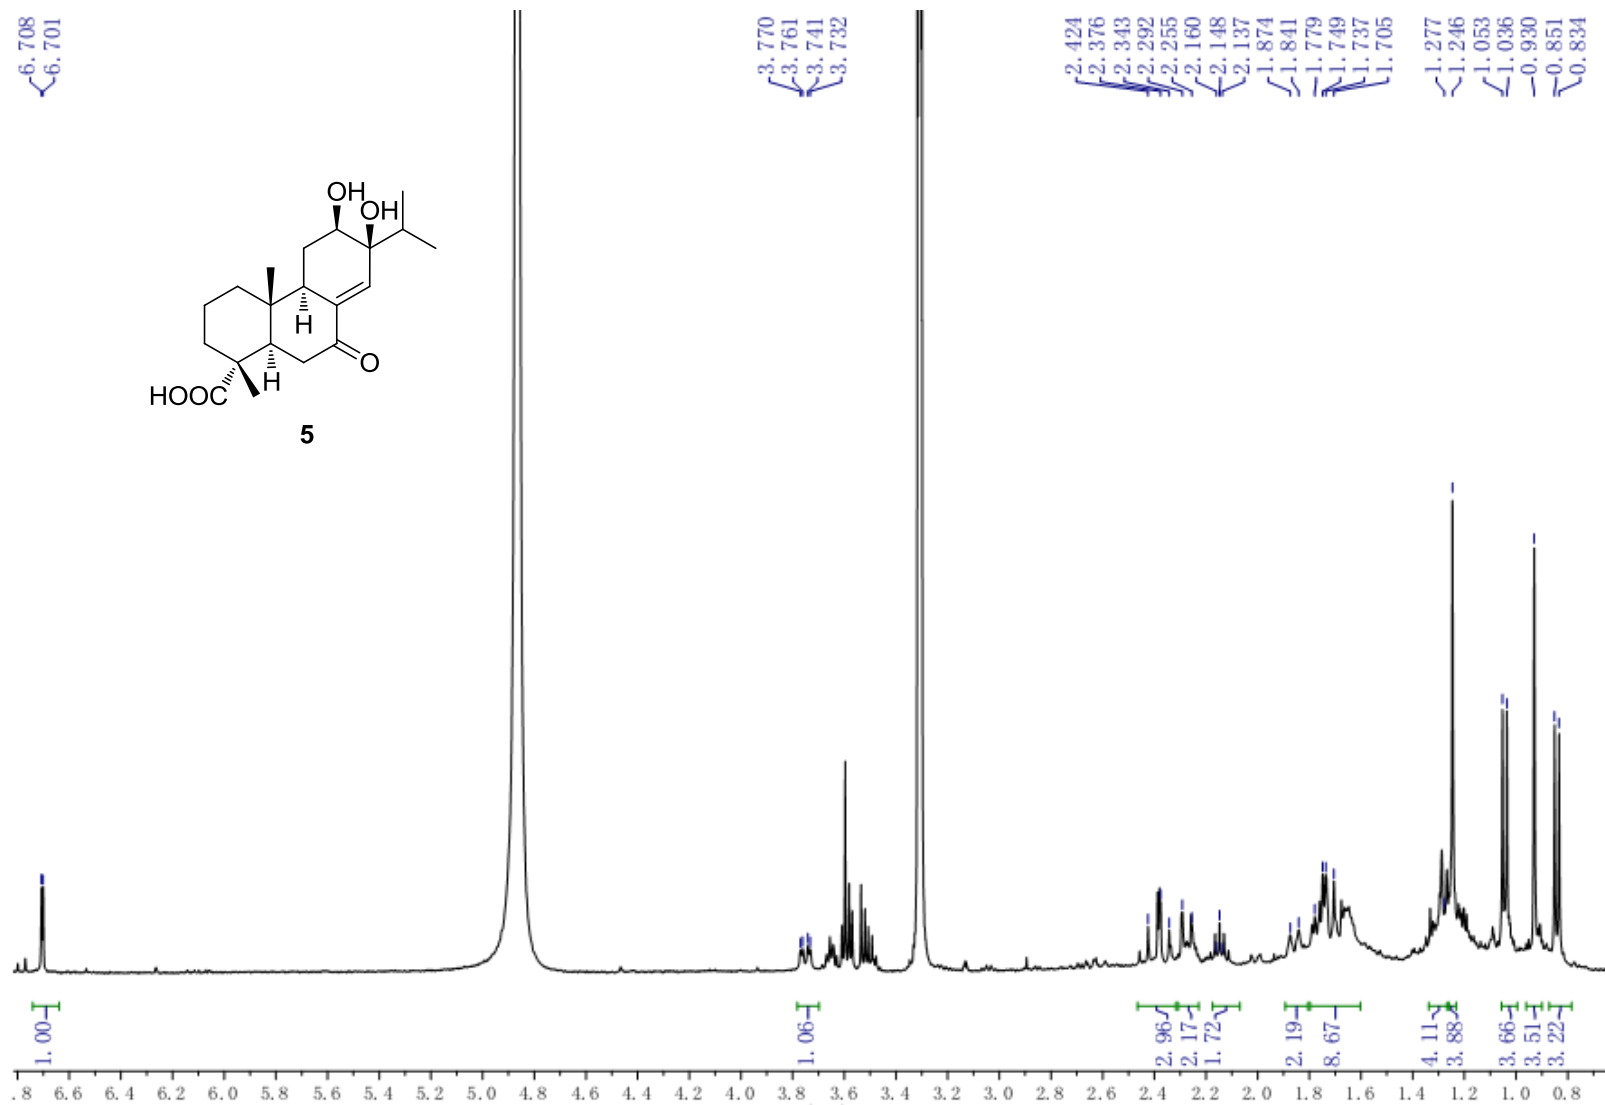

Compound 5:  $^{13}\text{C}$  NMR ( $\text{CD}_3\text{OD}$ ) spectrum

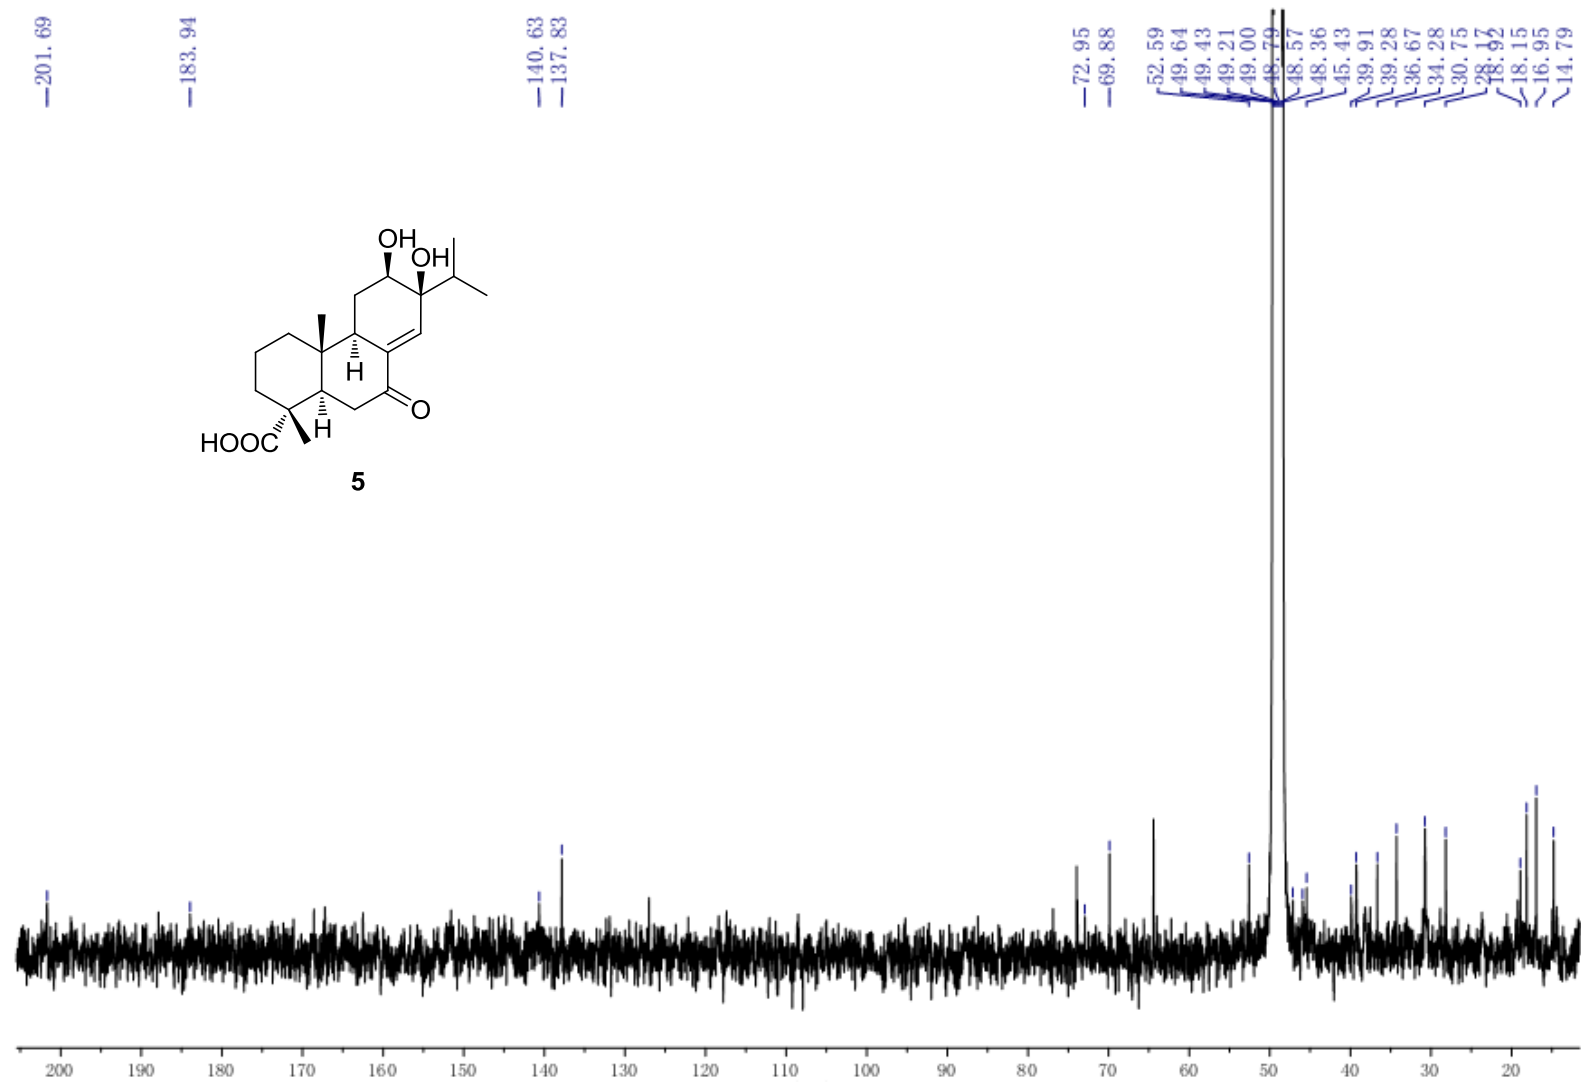

Compound 5: NOESY (CD<sub>3</sub>OD) spectrum

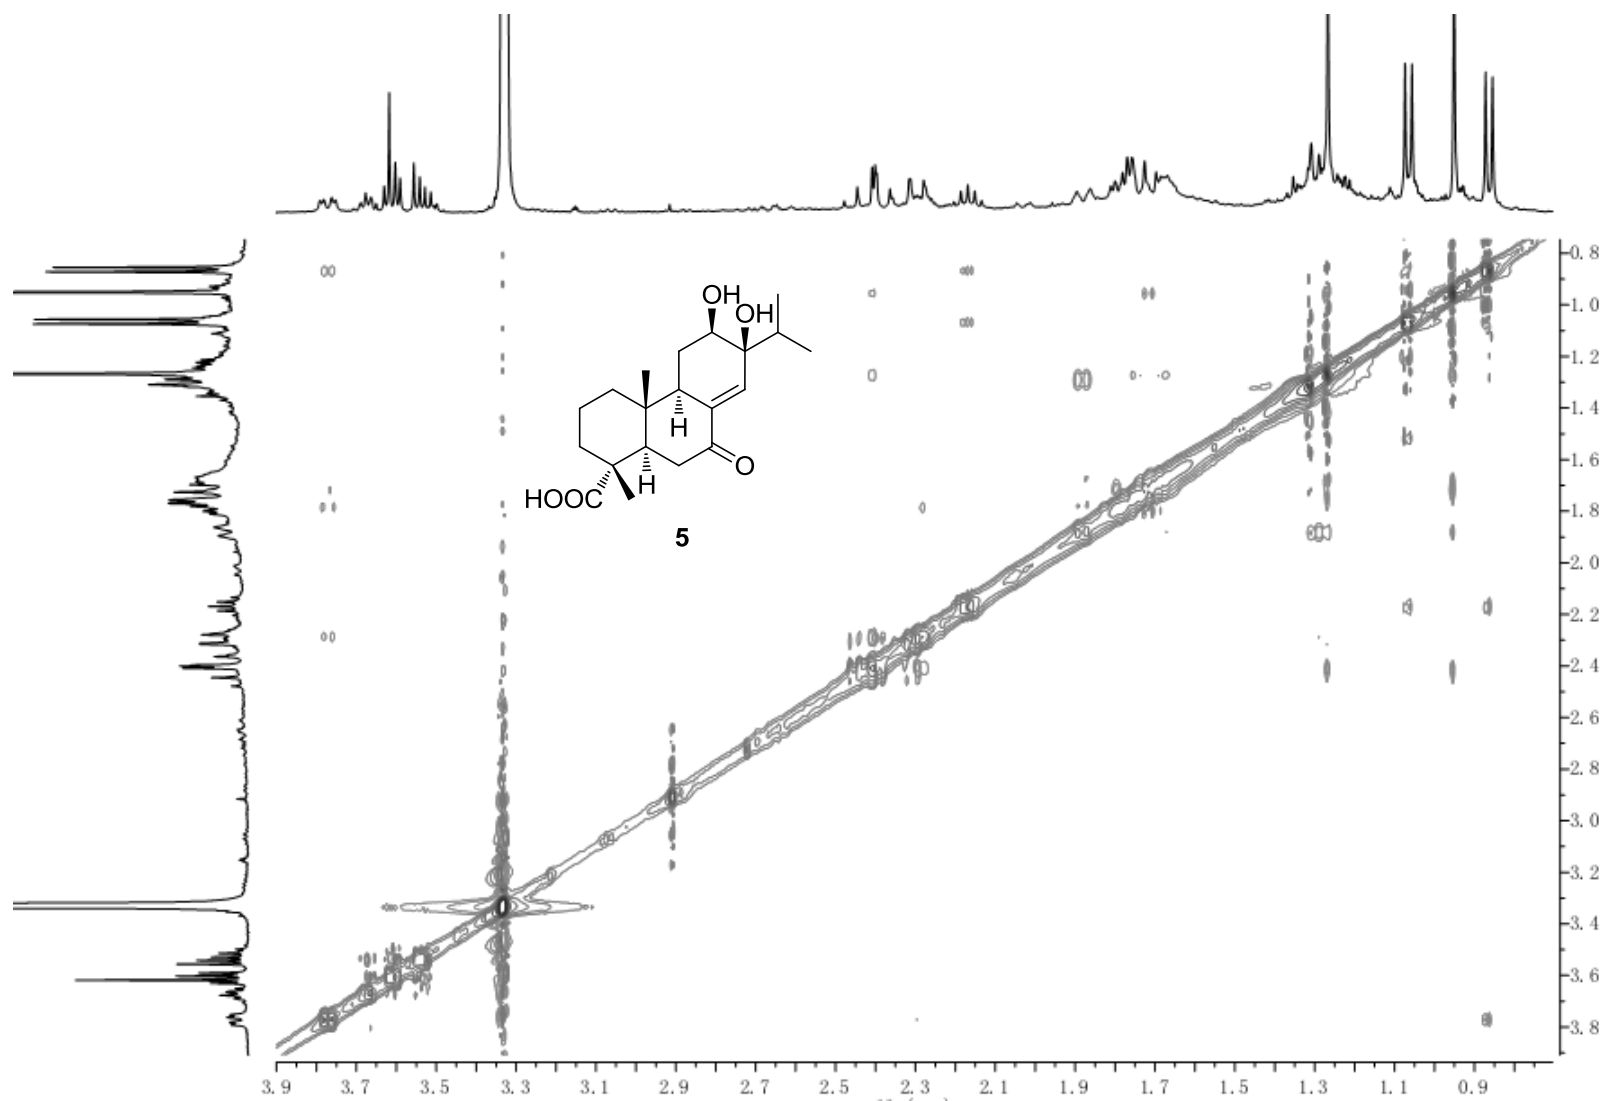

## Compound 5: (+) HR-ESIMS

### Qualitative Analysis Report

|                               |                  |                      |                       |
|-------------------------------|------------------|----------------------|-----------------------|
| <b>Data Filename</b>          | WZS-5011.d       | <b>Sample Name</b>   | WZS-501               |
| <b>Sample Type</b>            | Sample           | <b>Position</b>      | P1-A7                 |
| <b>Instrument Name</b>        | Instrument 1     | <b>User Name</b>     |                       |
| <b>Acq Method</b>             | general test 2.m | <b>Acquired Time</b> | 12/20/2013 9:49:14 AM |
| <b>IRM Calibration Status</b> | Success          | <b>DA Method</b>     | Screening-Default.m   |
| <b>Comment</b>                |                  |                      |                       |

#### User Spectra

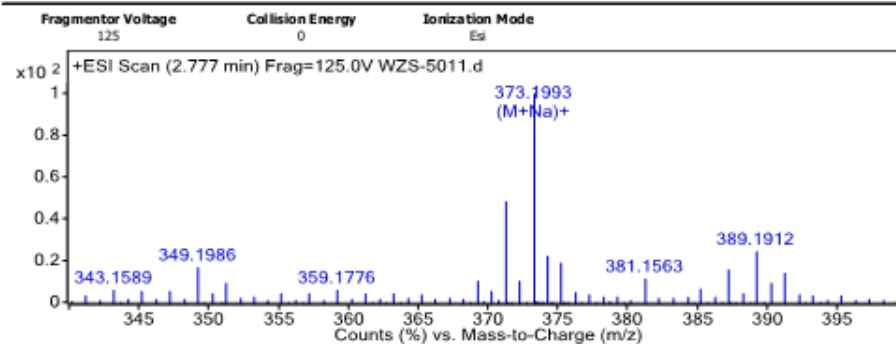

#### Peak List

| m/z      | z | Abund  | Formula       | Ion     |
|----------|---|--------|---------------|---------|
| 373.1993 | 1 | 497468 | C20 H30 Na O5 | (M+Na)+ |

#### Formula Calculator Element Limits

| Element | Min | Max |
|---------|-----|-----|
| C       | 3   | 60  |
| H       | 0   | 120 |
| O       | 0   | 30  |
| N       | 0   | 1   |
| S       | 0   | 0   |
| Cl      | 0   | 0   |
| Br      | 0   | 0   |
| Si      | 0   | 0   |

#### Formula Calculator Results

| Formula    | Best | Mass   | Tgt Mass | Diff (ppm) | Ion Species   | Score |
|------------|------|--------|----------|------------|---------------|-------|
| C20 H30 O5 | TRUE | 350.21 | 350.2093 | -1.84      | C20 H30 Na O5 | 61.85 |

--- End Of Report ---



Compound 6:  $^1\text{H}$  NMR ( $\text{CDCl}_3$ ) spectrum

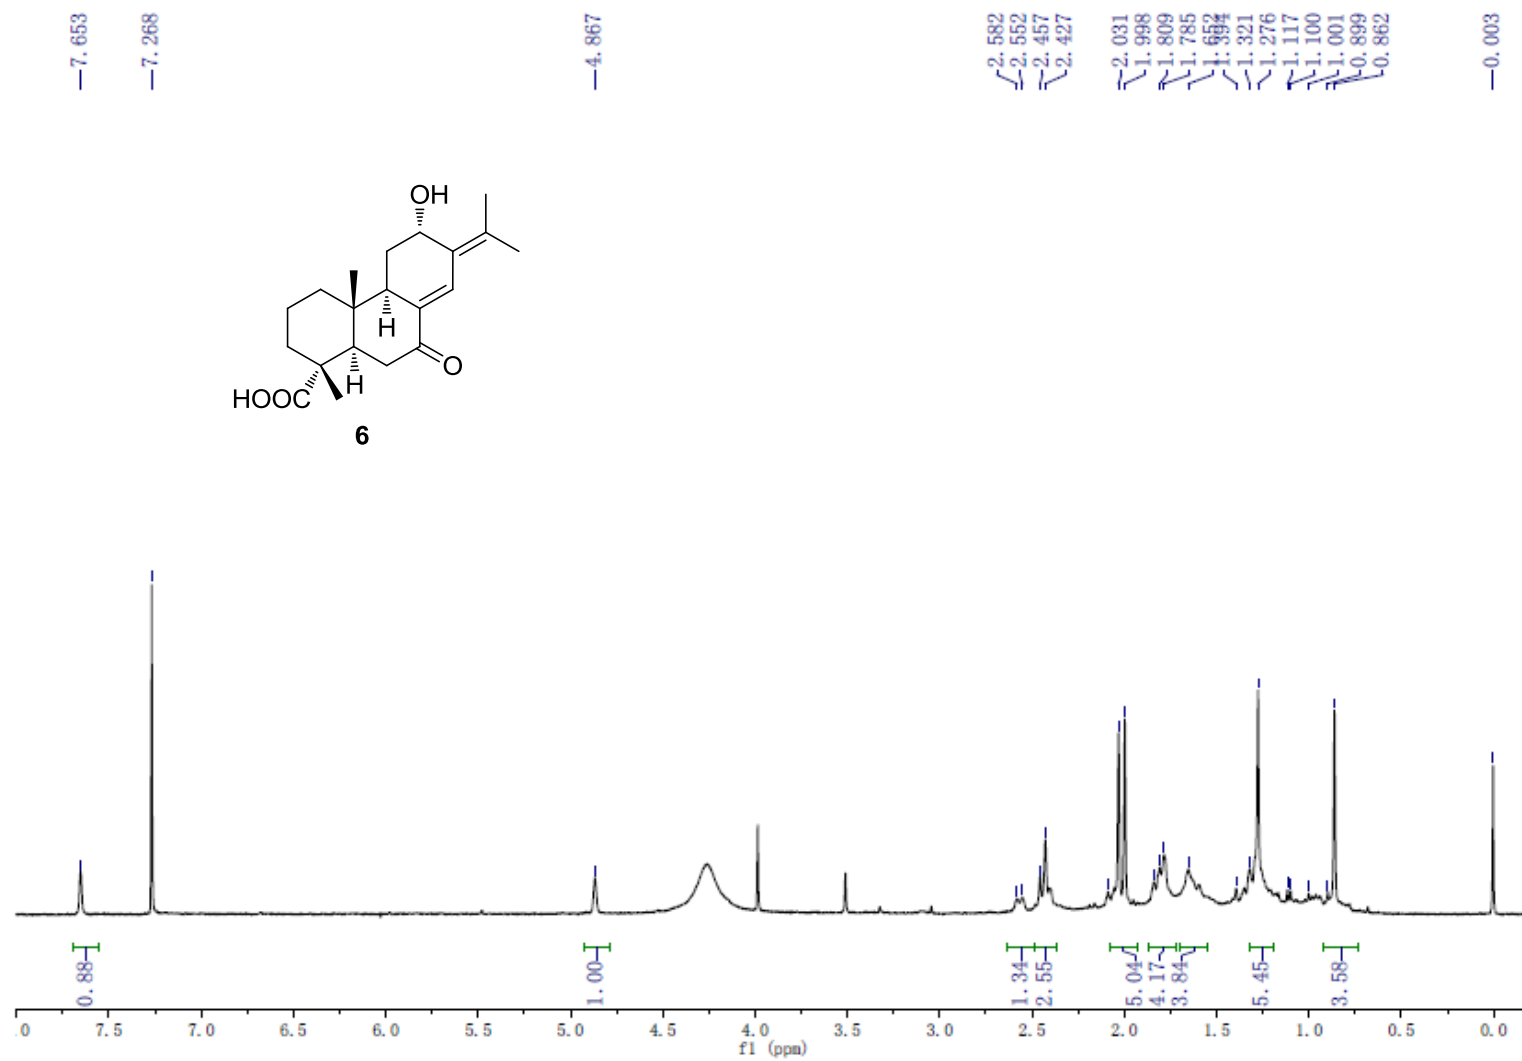

Compound 6:  $^{13}\text{C}$  NMR ( $\text{CDCl}_3$ ) spectrum

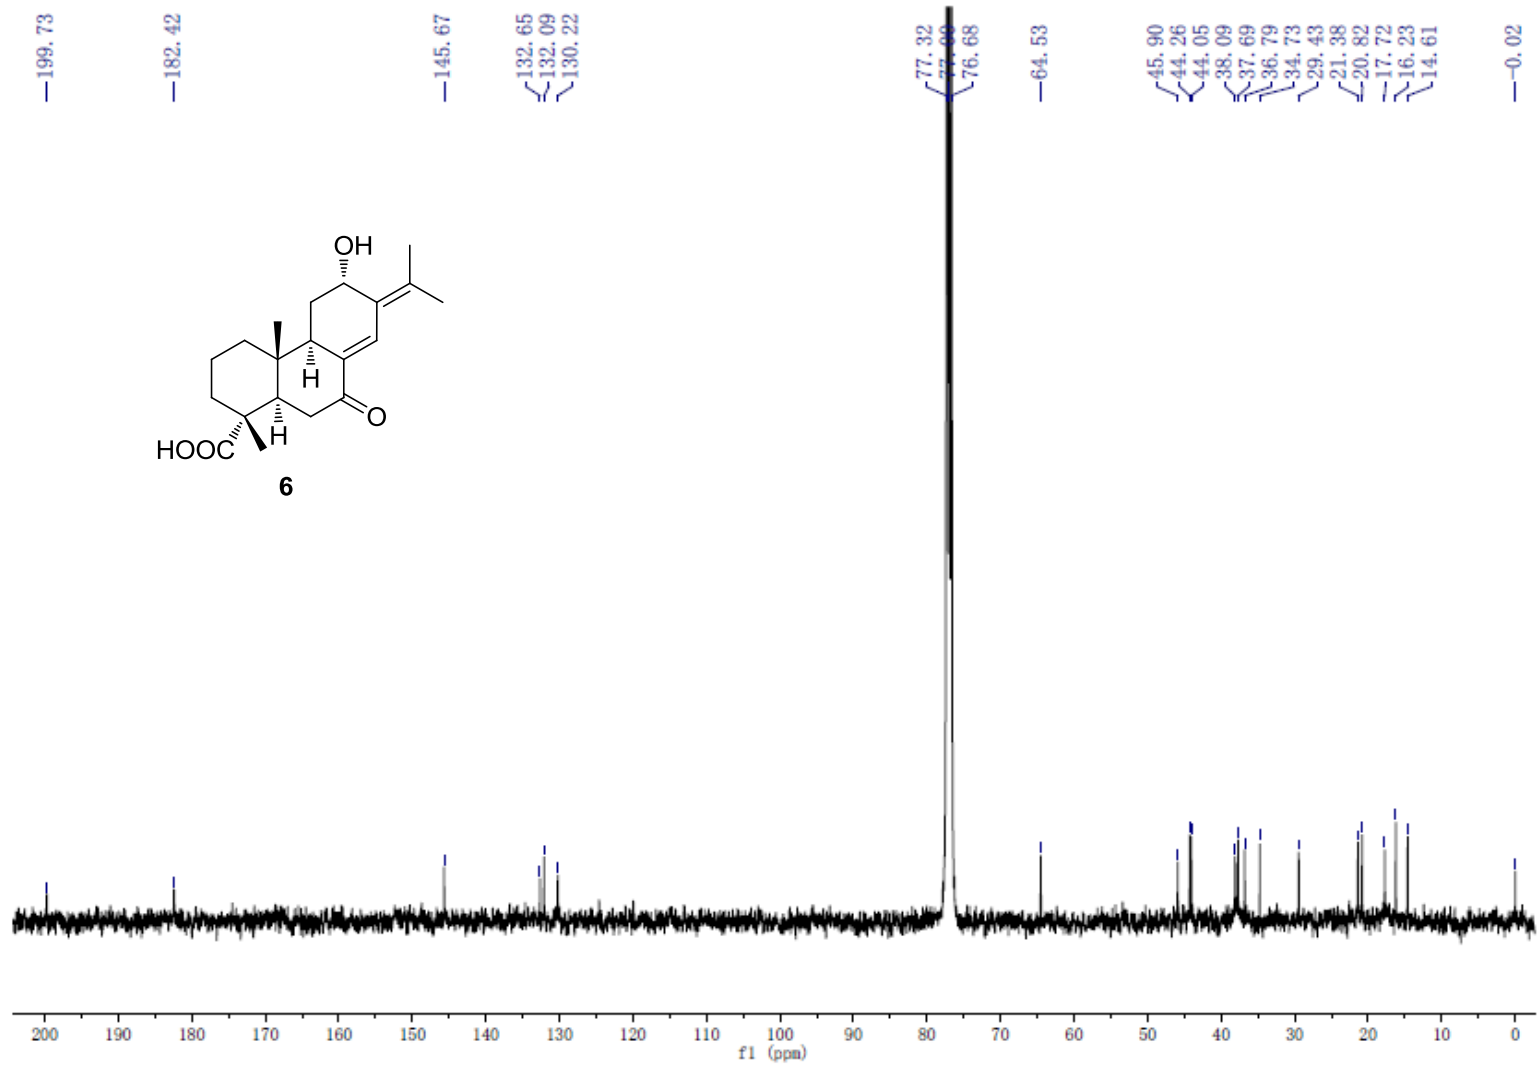

Compound 6: HSQC (CDCl<sub>3</sub>) spectrum

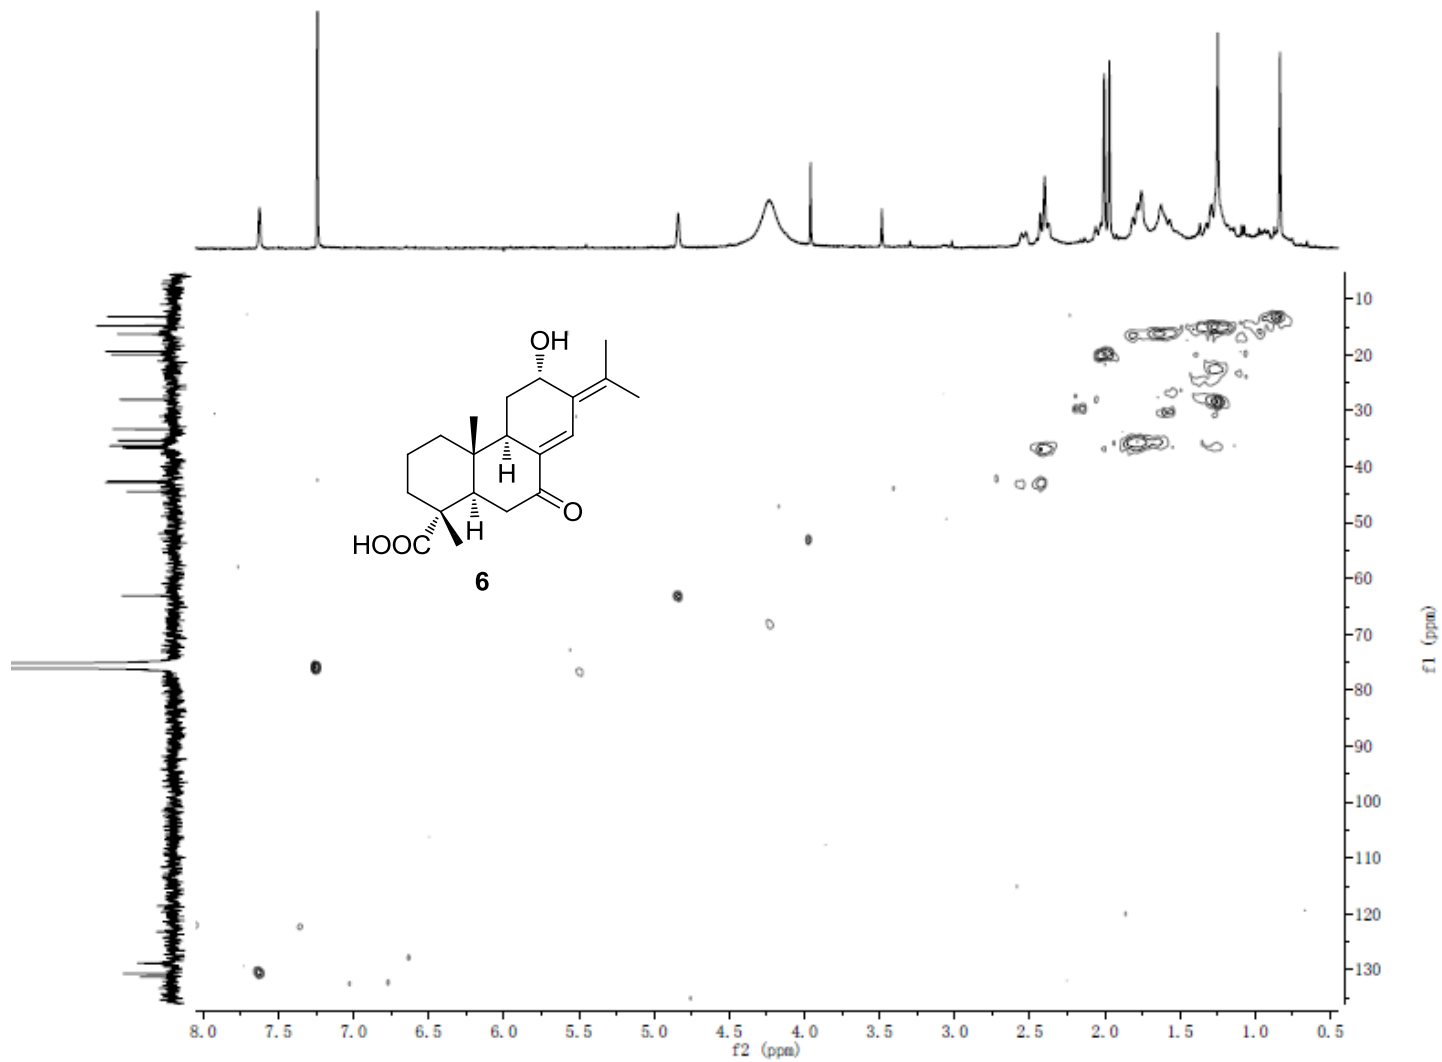

Compound 6: HMBC (CDCl<sub>3</sub>) spectrum

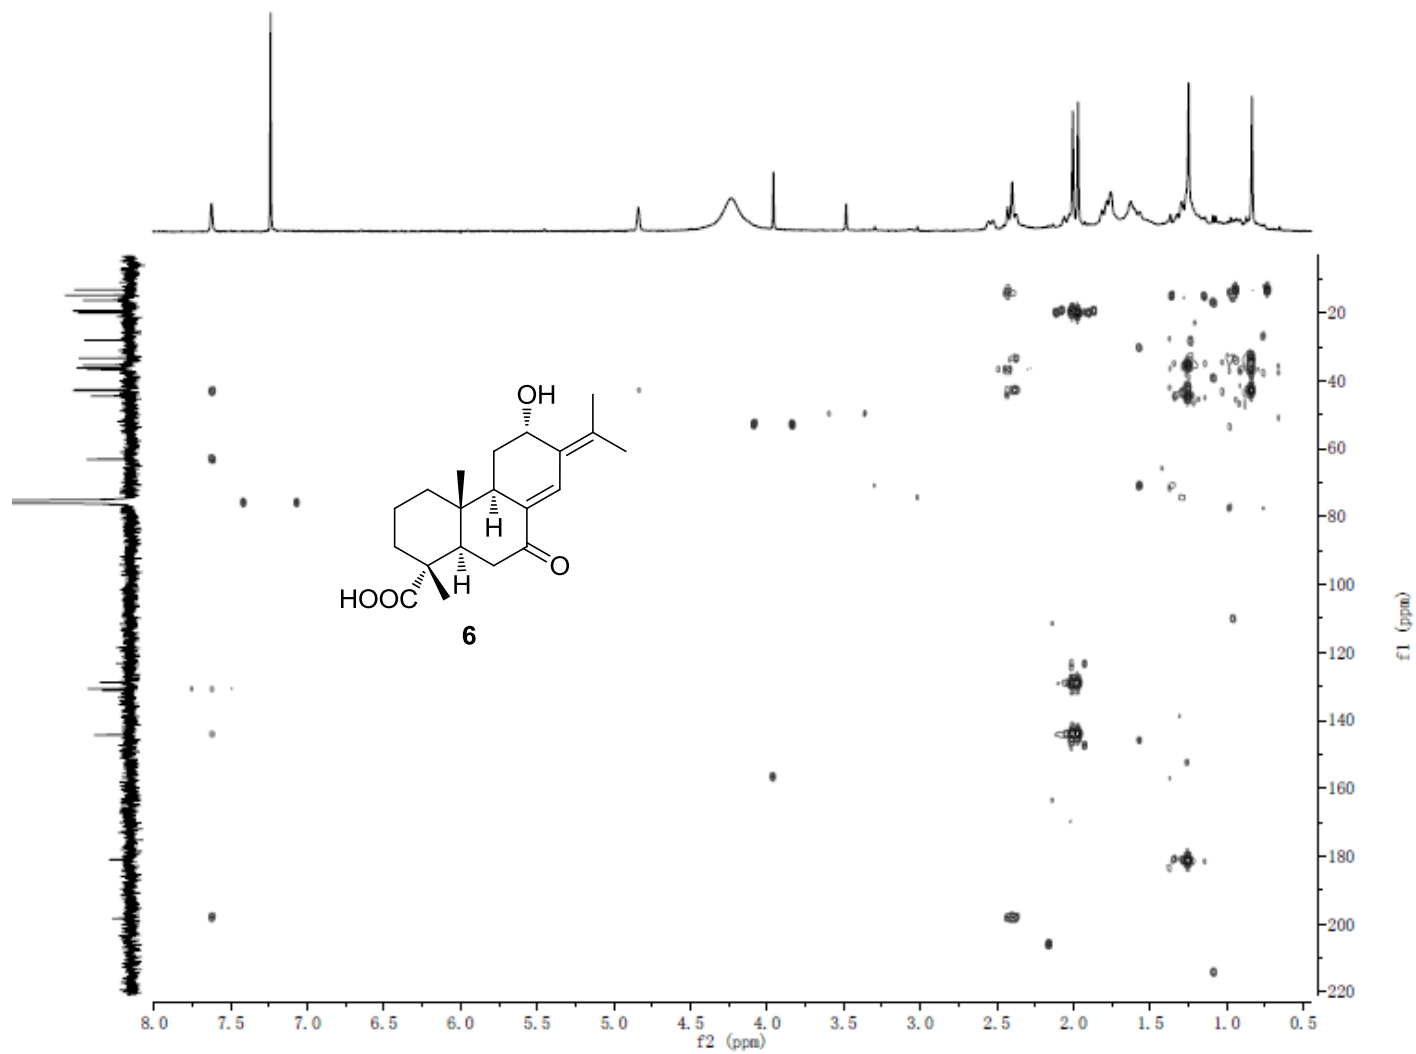

Compound 6: NOESY (CDCl<sub>3</sub>) spectrum

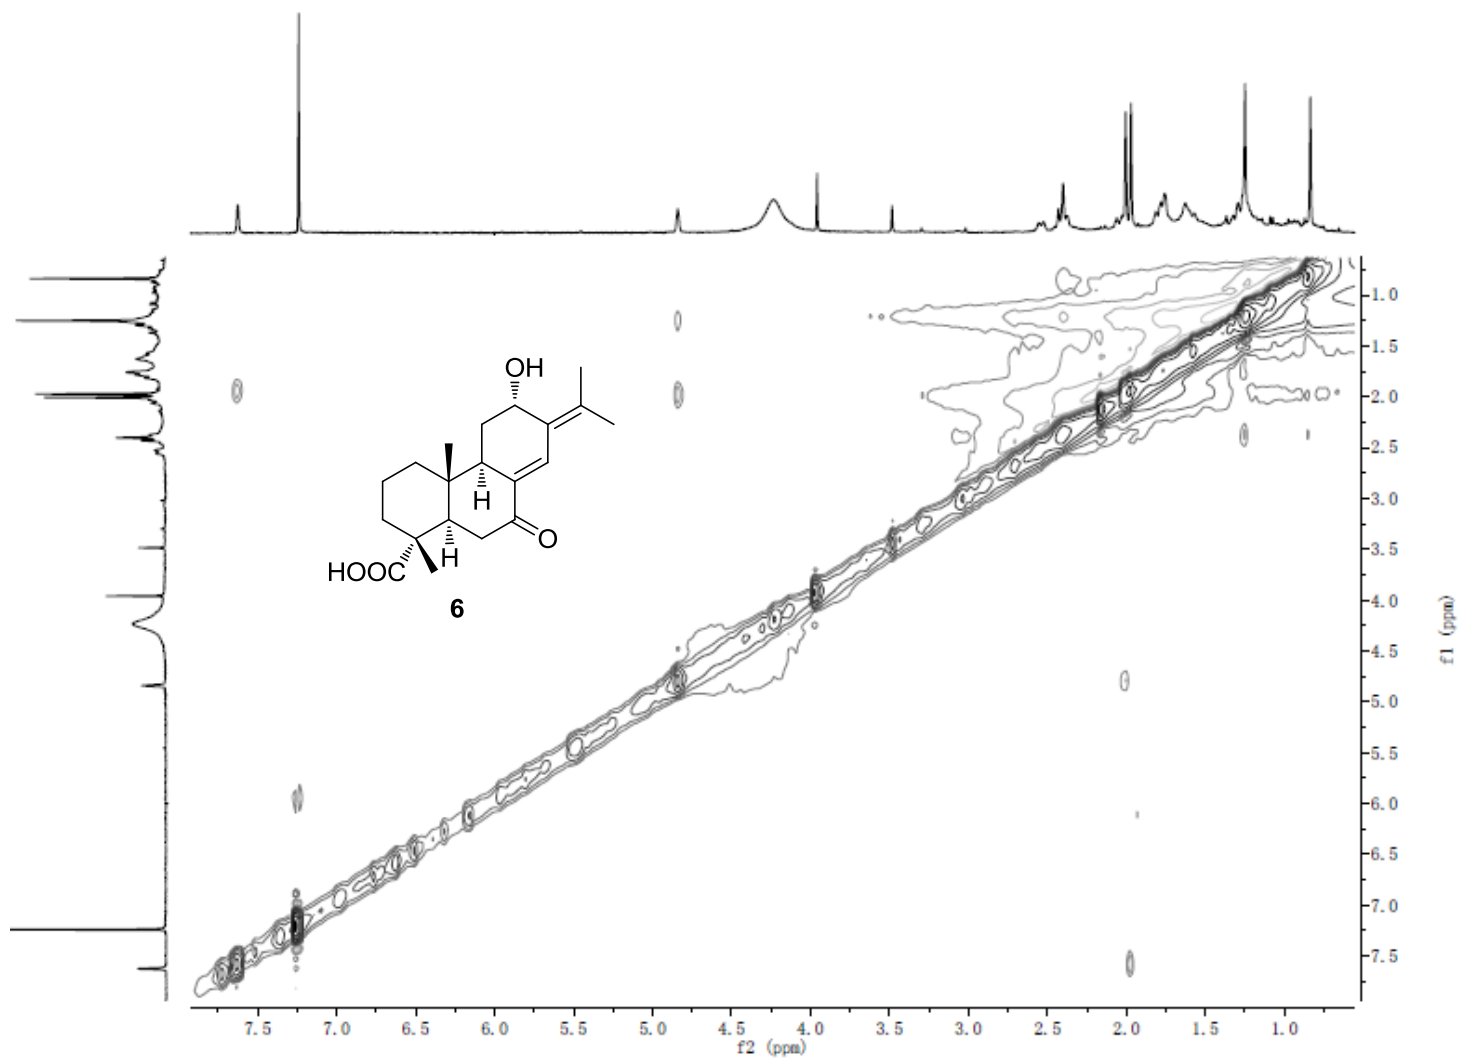

Compound 6: (+) HR-ESIMS

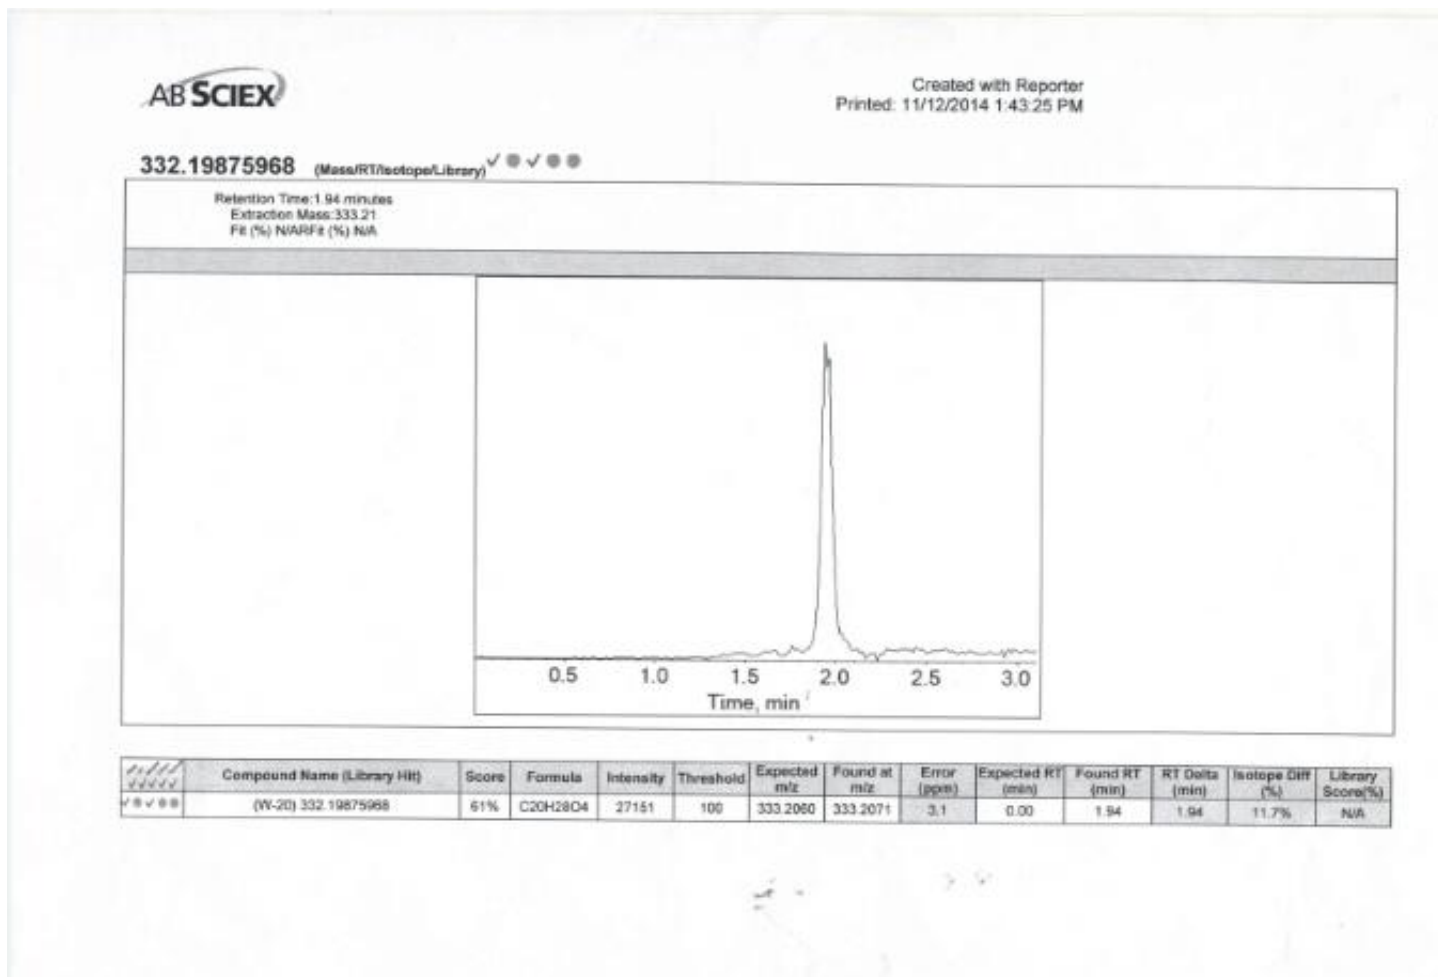

Compound 7:  $^1\text{H}$  NMR ( $\text{CDCl}_3$ ) spectrum

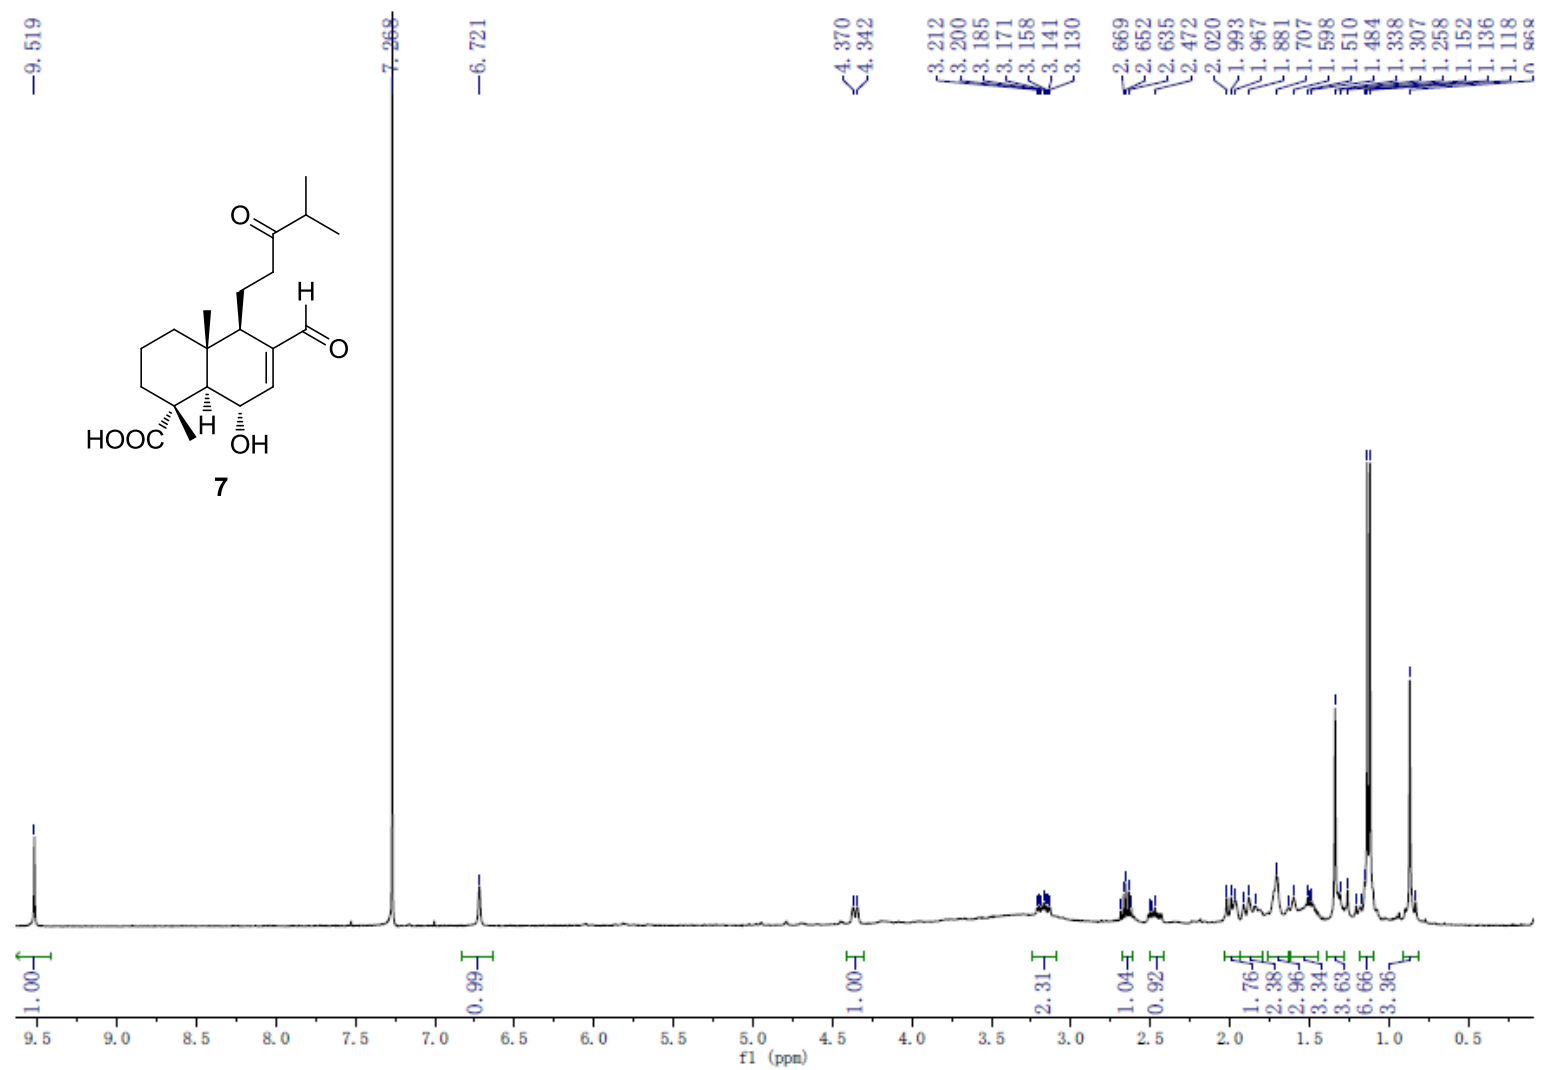

Compound 7:  $^{13}\text{C}$  NMR ( $\text{CDCl}_3$ ) spectrum

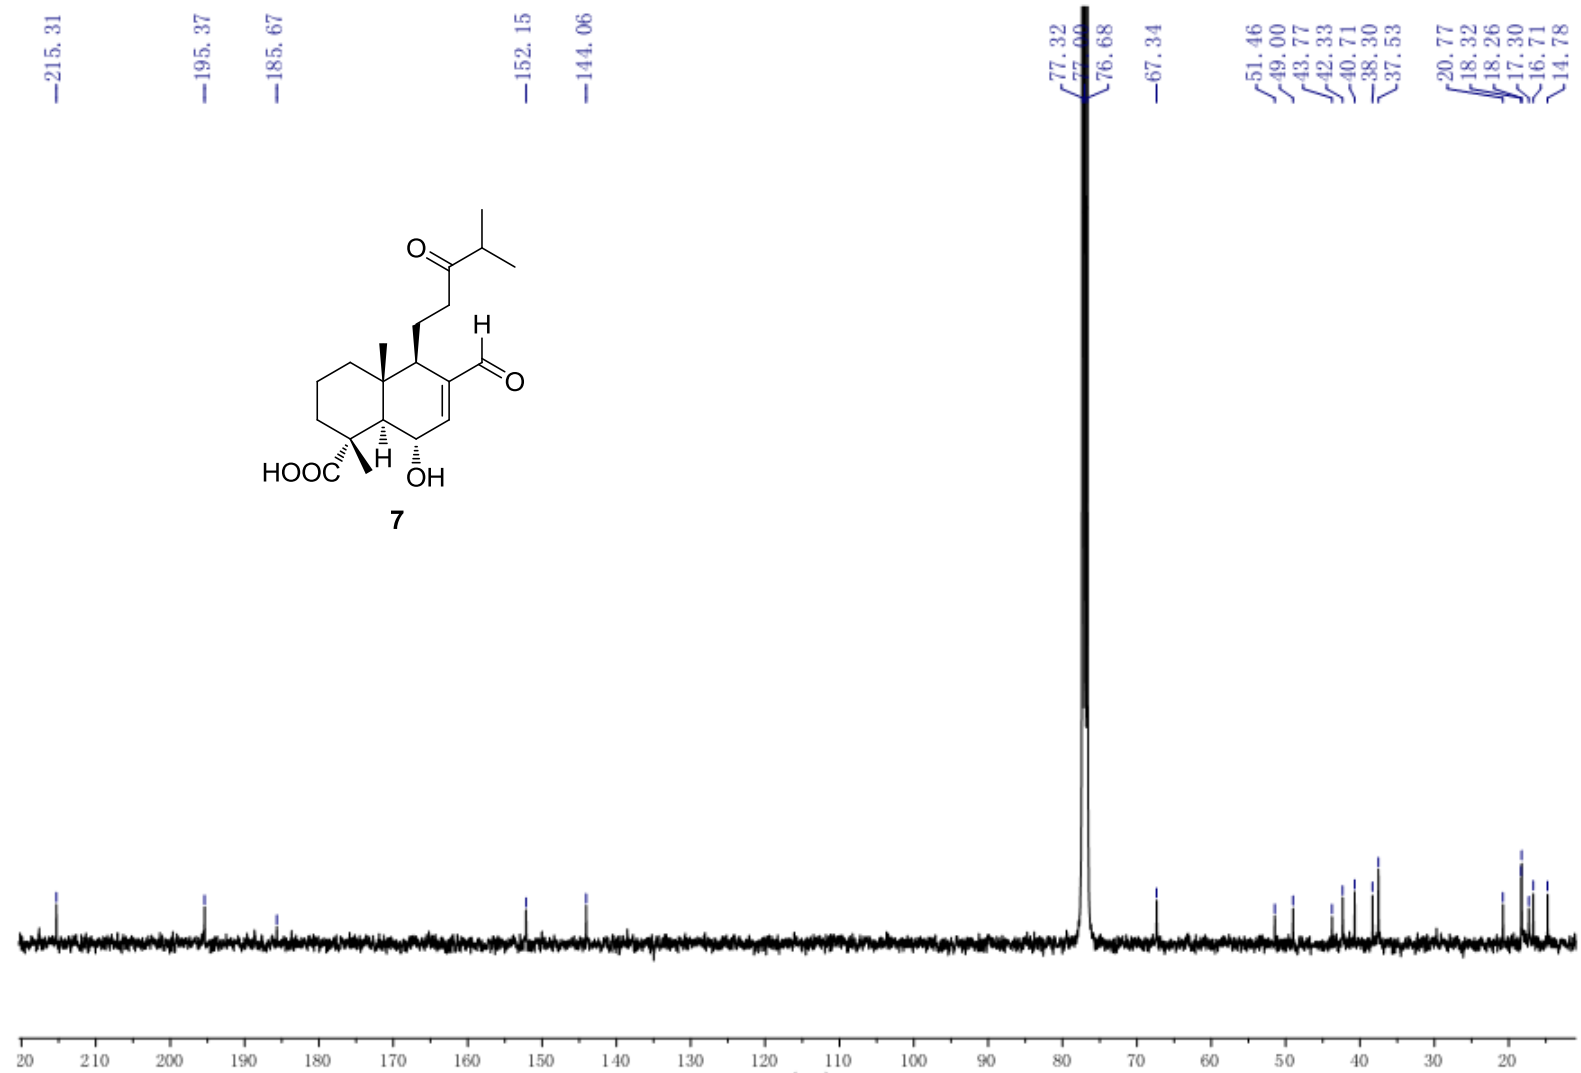



Compound 7:  $^1\text{H}$ - $^1\text{H}$  COSY ( $\text{CDCl}_3$ ) spectrum

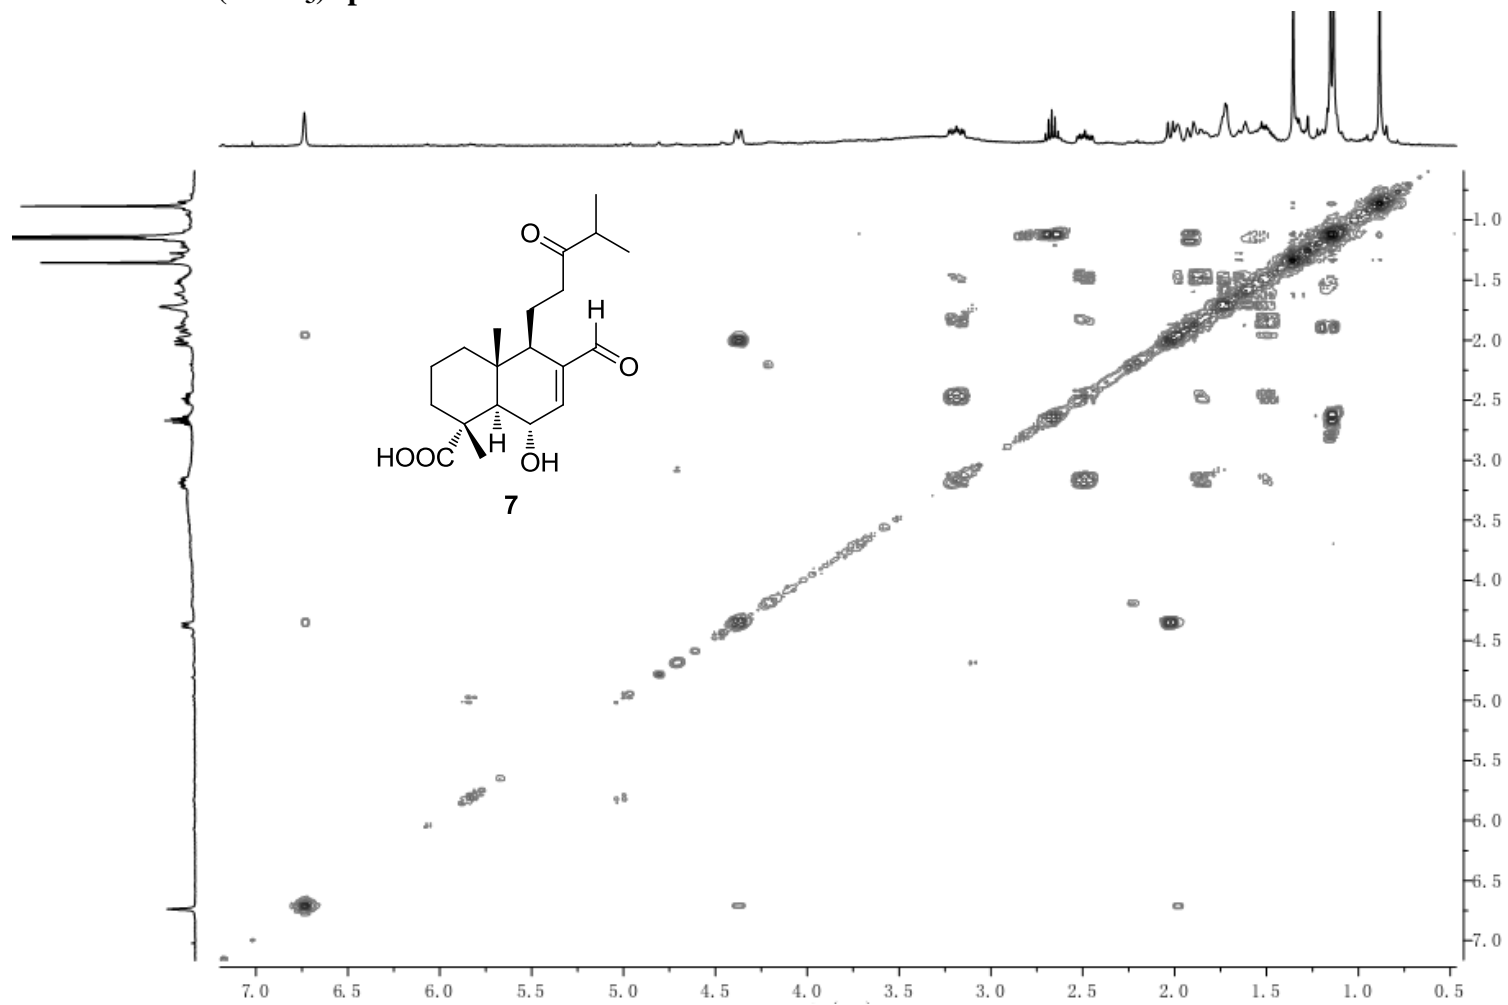

**Compound 7: HMBC (CDCl<sub>3</sub>) spectrum**

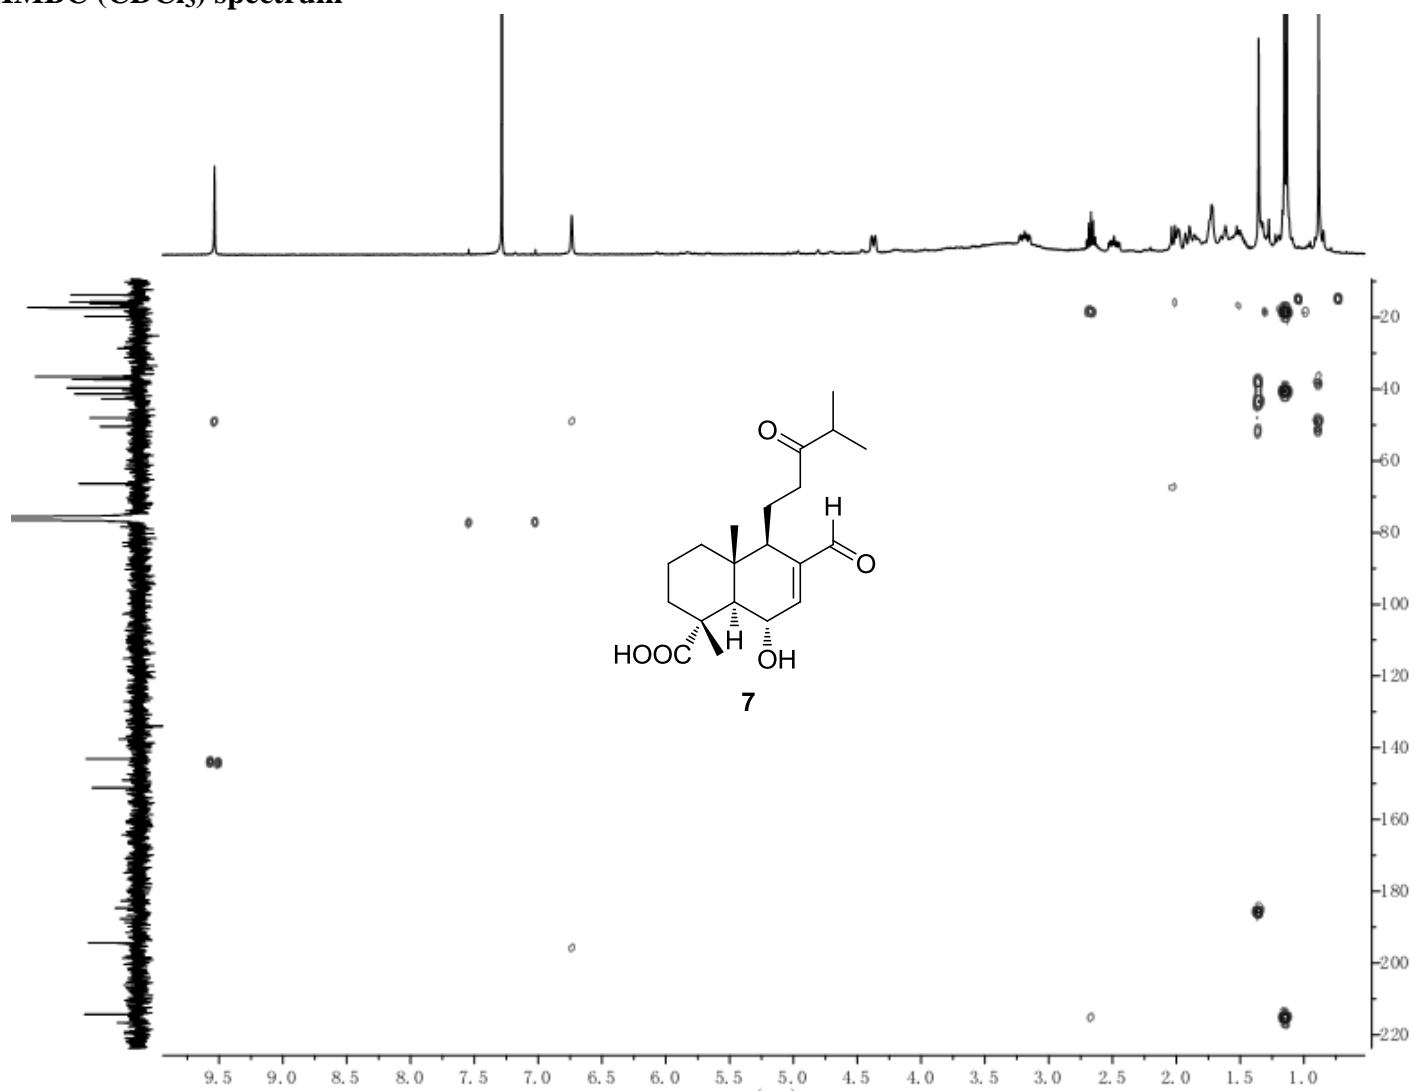

Compound 7: NOESY (CDCl<sub>3</sub>) spectrum

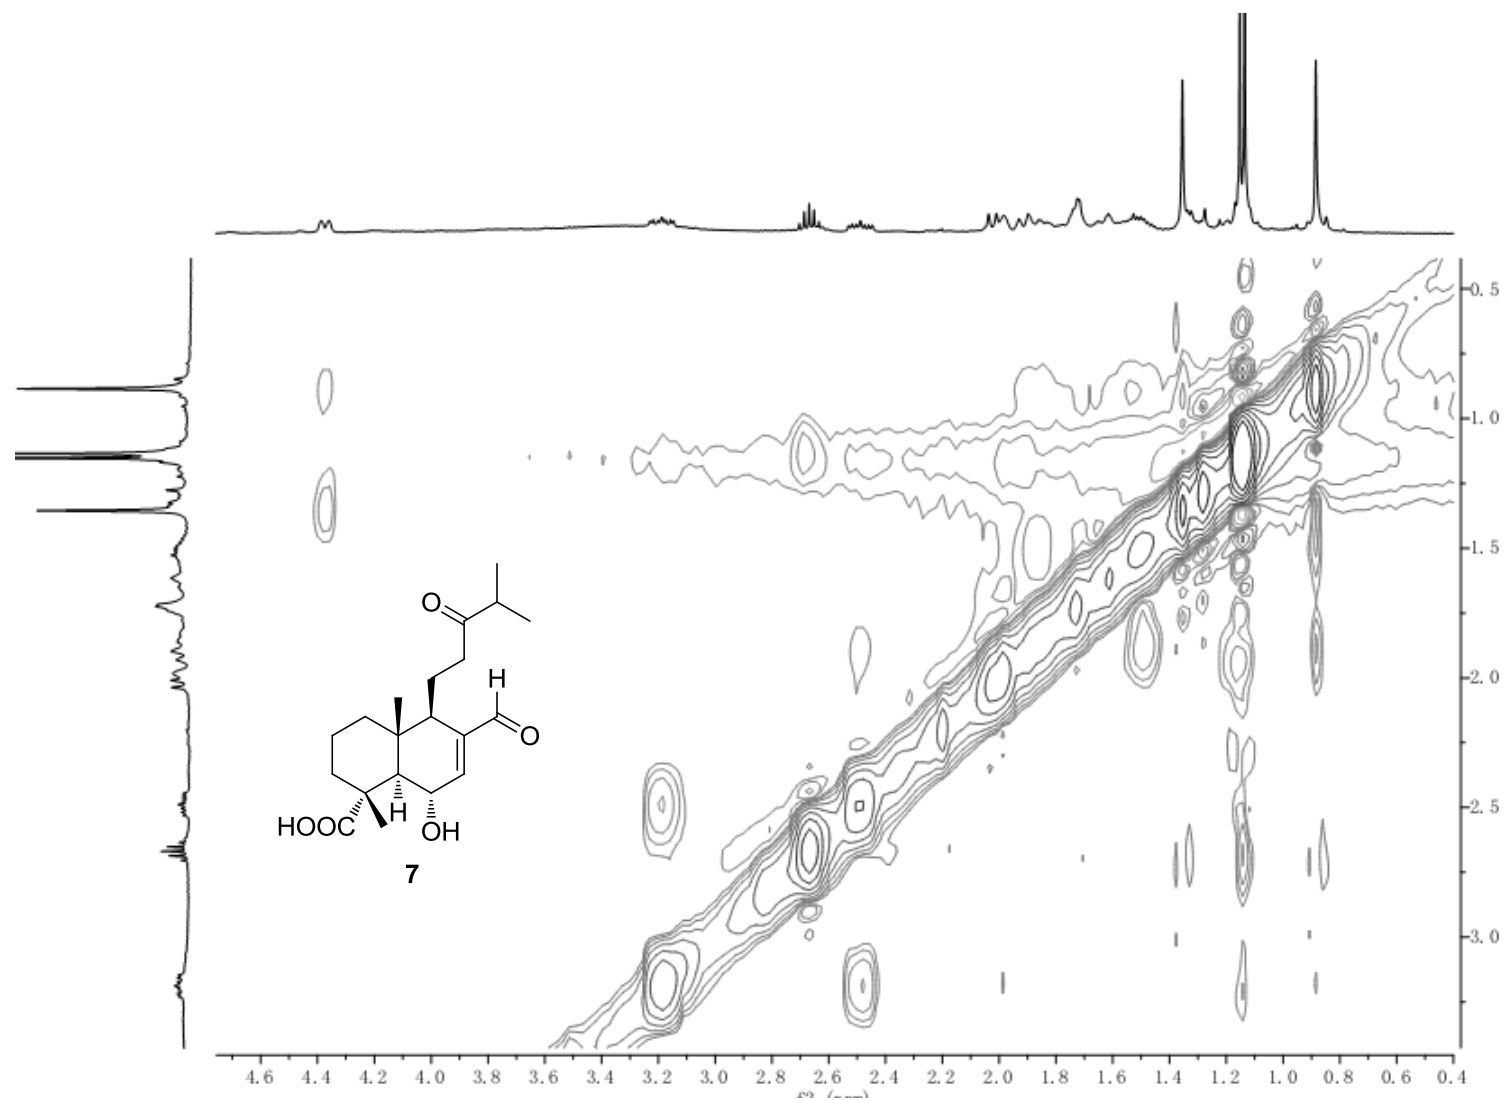

## Compound 7: (+) HR-ESIMS

### Qualitative Analysis Report

|                               |                  |                      |                       |
|-------------------------------|------------------|----------------------|-----------------------|
| <b>Data Filename</b>          | WZS53.d          | <b>Sample Name</b>   | WZS53                 |
| <b>Sample Type</b>            | Sample           | <b>Position</b>      | P1-D5                 |
| <b>Instrument Name</b>        | Instrument 1     | <b>User Name</b>     |                       |
| <b>Acq Method</b>             | general test 2.m | <b>Acquired Time</b> | 12/19/2013 2:51:11 PM |
| <b>IRM Calibration Status</b> | Some Ions Missed | <b>DA Method</b>     | Screening-Default.m   |
| <b>Comment</b>                |                  |                      |                       |

#### User Spectra

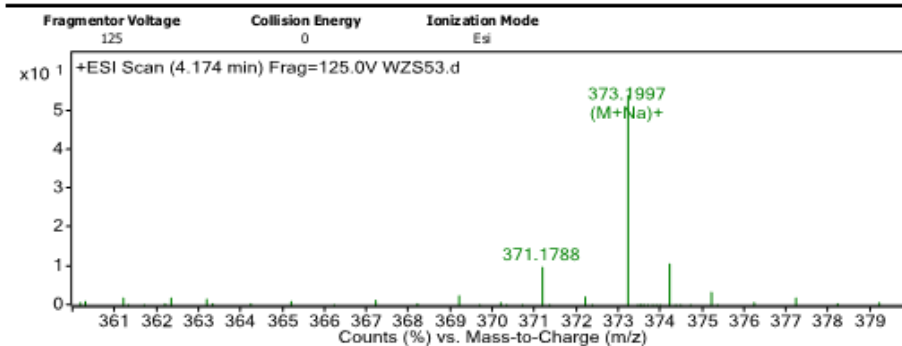

#### Peak List

| m/z      | z | Abund  |
|----------|---|--------|
| 355.1893 | 1 | 741171 |

#### Formula Calculator Element Limits

| Element | Min | Max |
|---------|-----|-----|
| C       | 3   | 60  |
| H       | 0   | 120 |
| O       | 0   | 30  |
| N       | 0   | 1   |
| S       | 0   | 0   |
| Cl      | 0   | 0   |
| Br      | 0   | 0   |
| Si      | 0   | 0   |

#### Formula Calculator Results

| Formula    | Best | Mass     | Tgt Mass | Diff (ppm) | Ion Species   | Score |
|------------|------|----------|----------|------------|---------------|-------|
| C20 H30 O5 | TRUE | 350.2105 | 350.2093 | -3.33      | C20 H30 Na O5 | 82.25 |

--- End Of Report ---

Compound 8:  $^1\text{H}$  NMR ( $\text{CDCl}_3$ ) spectrum

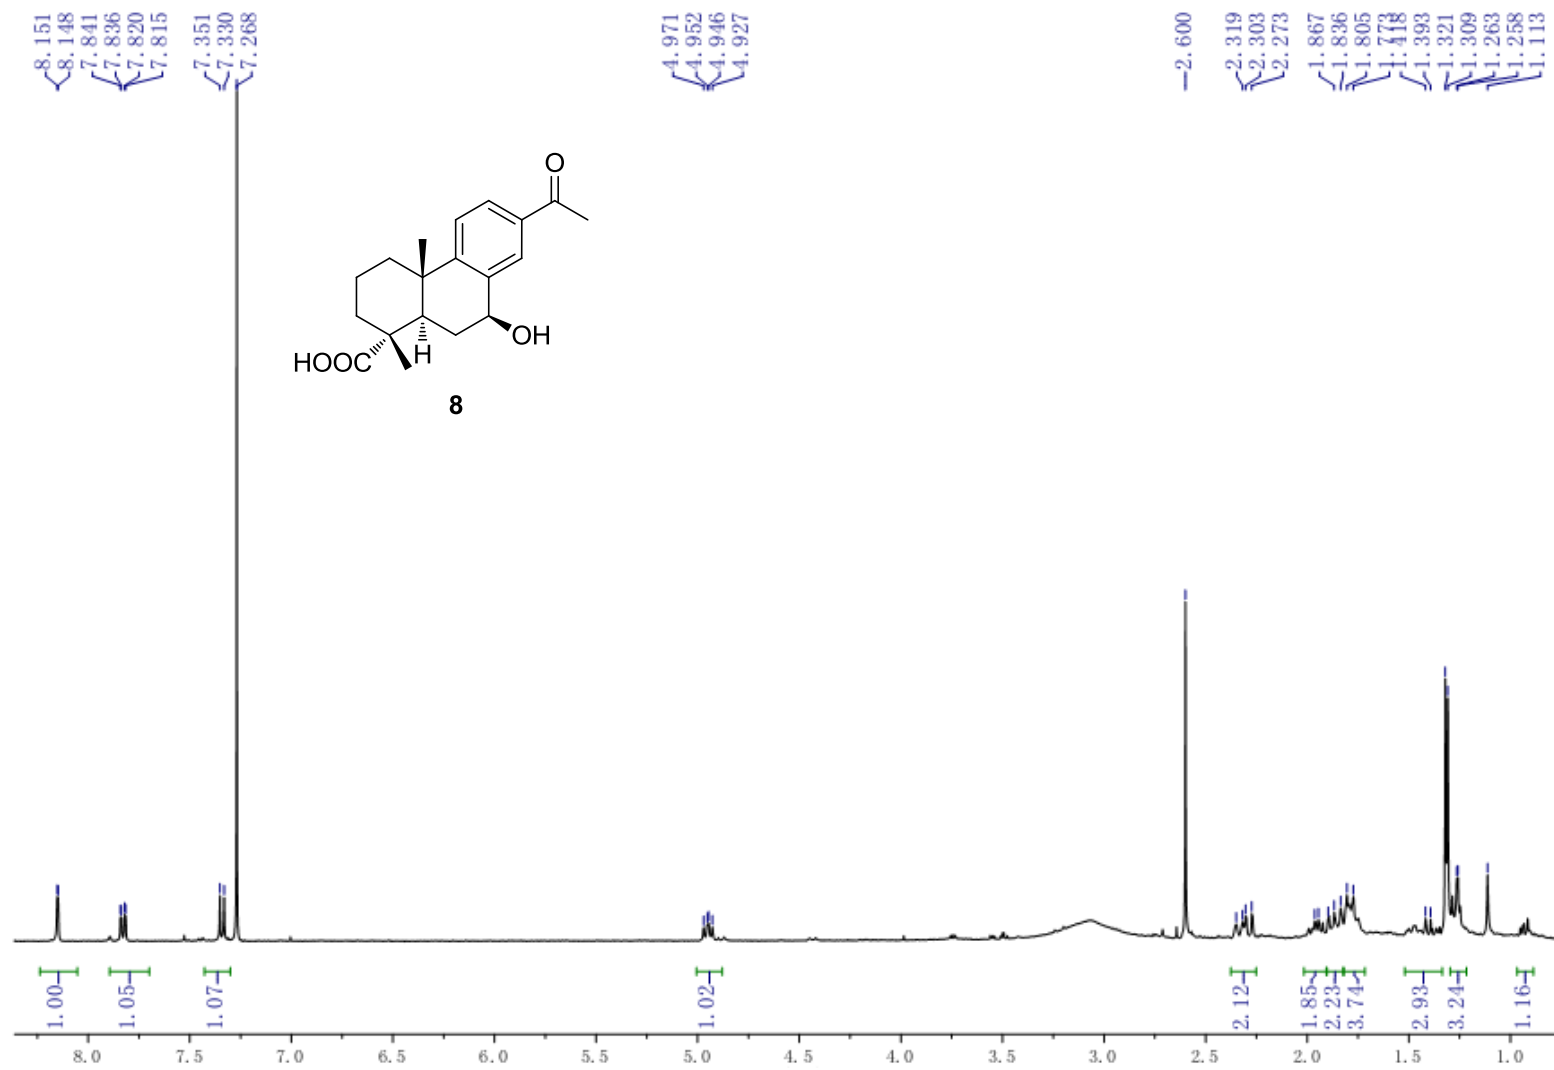

Compound 8:  $^{13}\text{C}$  NMR ( $\text{CDCl}_3$ ) spectrum

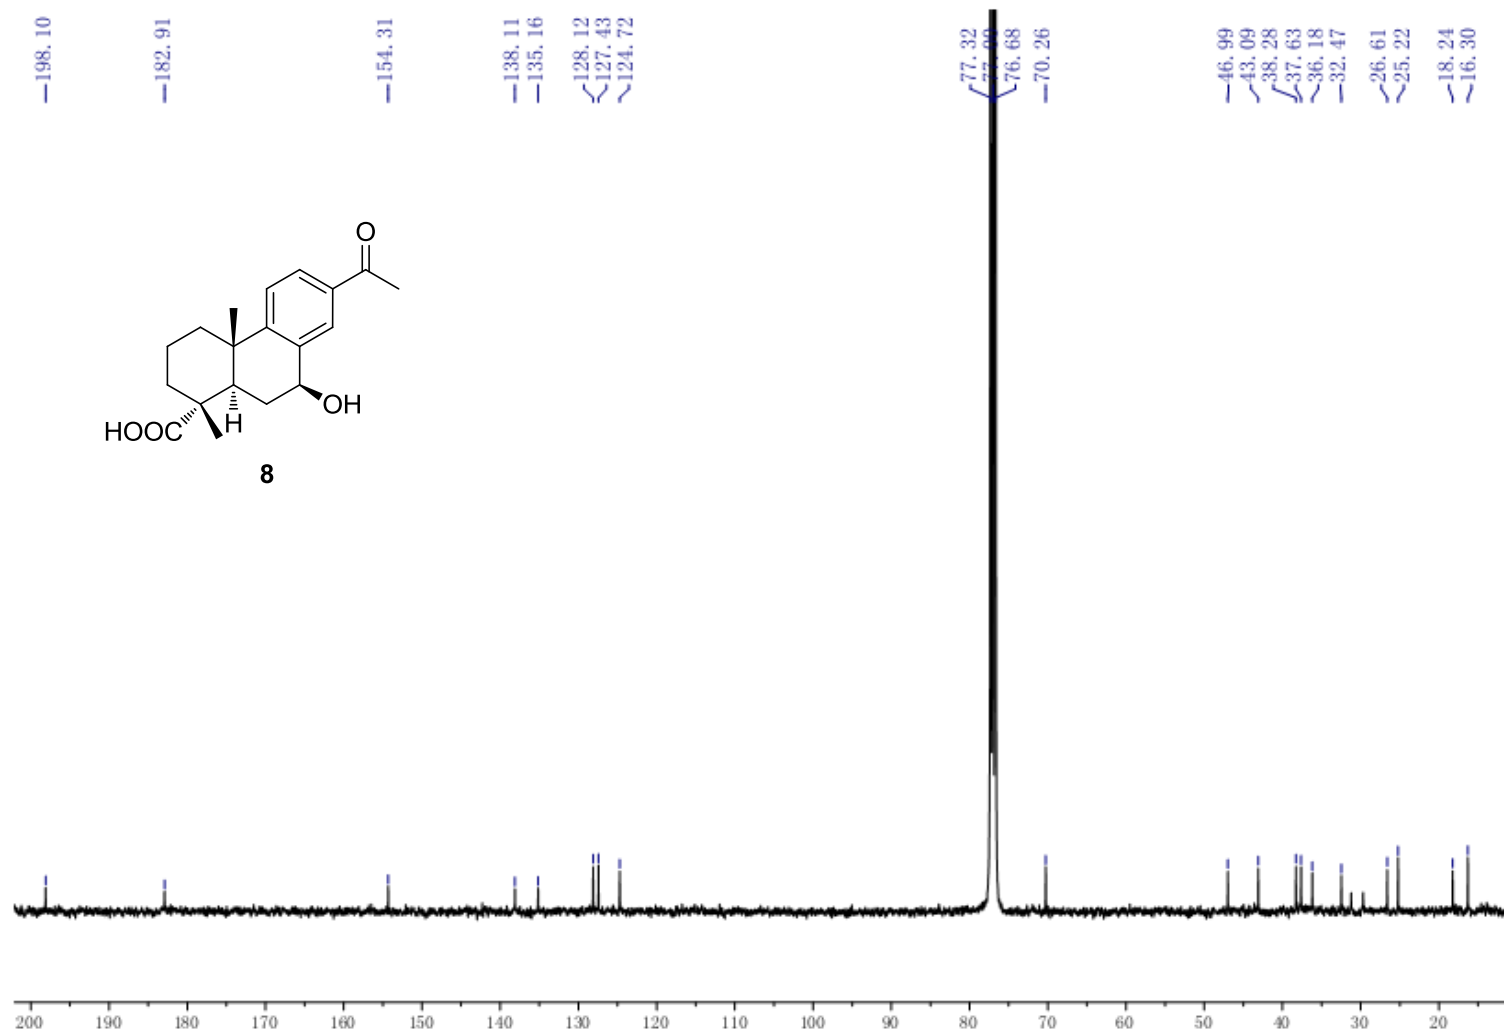

Compound 8:  $^1\text{H}$ - $^1\text{H}$  COSY ( $\text{CDCl}_3$ ) spectrum

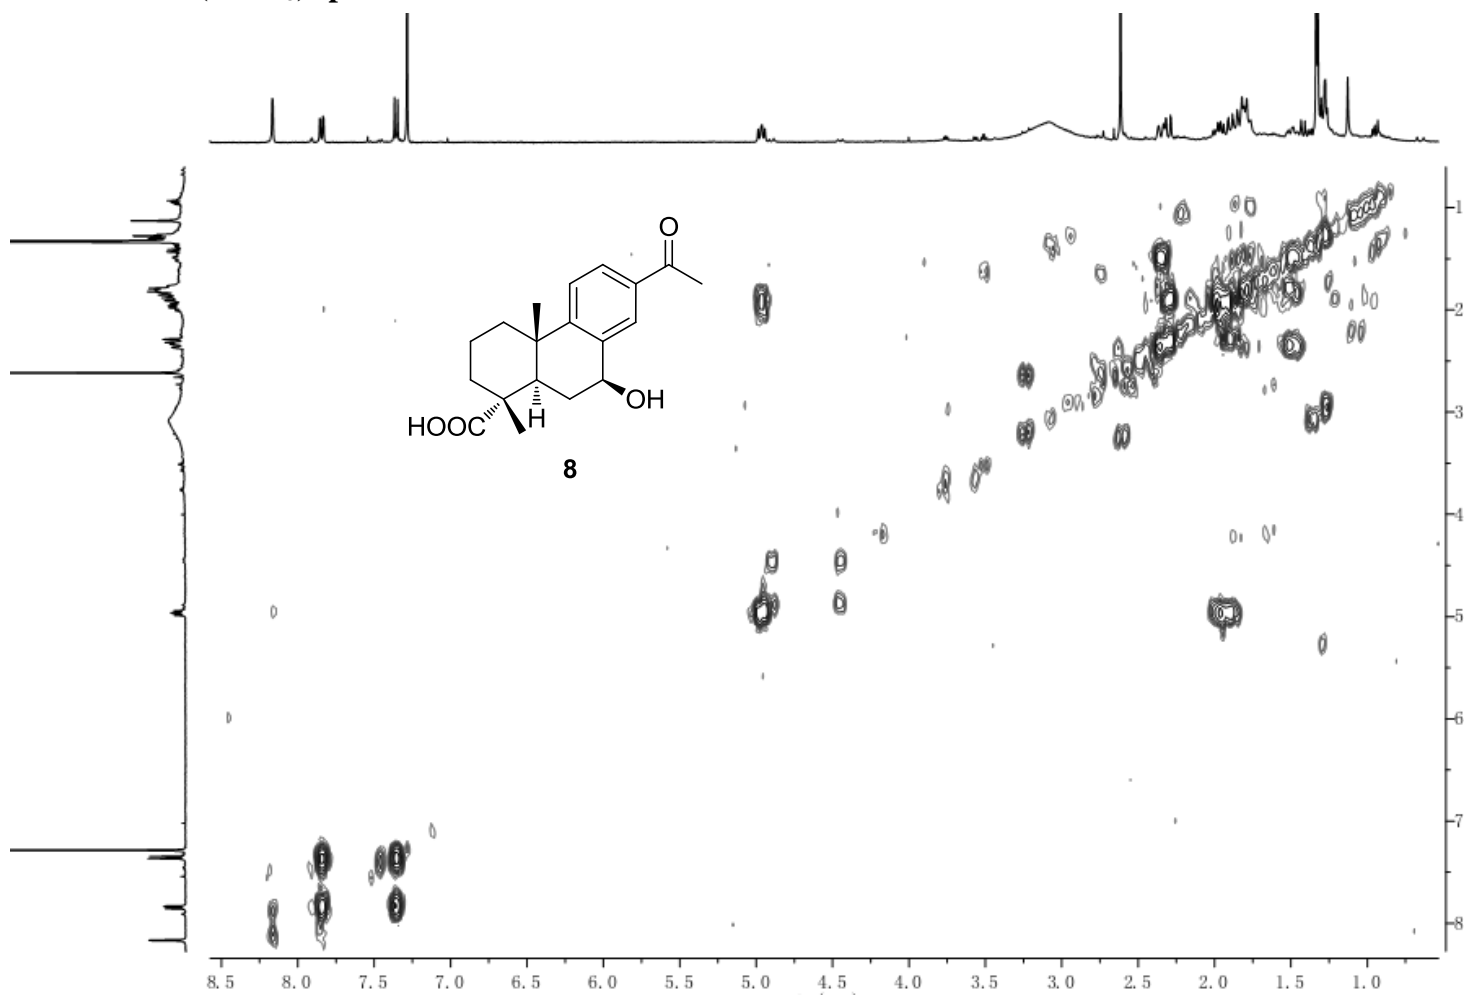

Compound 8: HMBC (CDCl<sub>3</sub>) spectrum

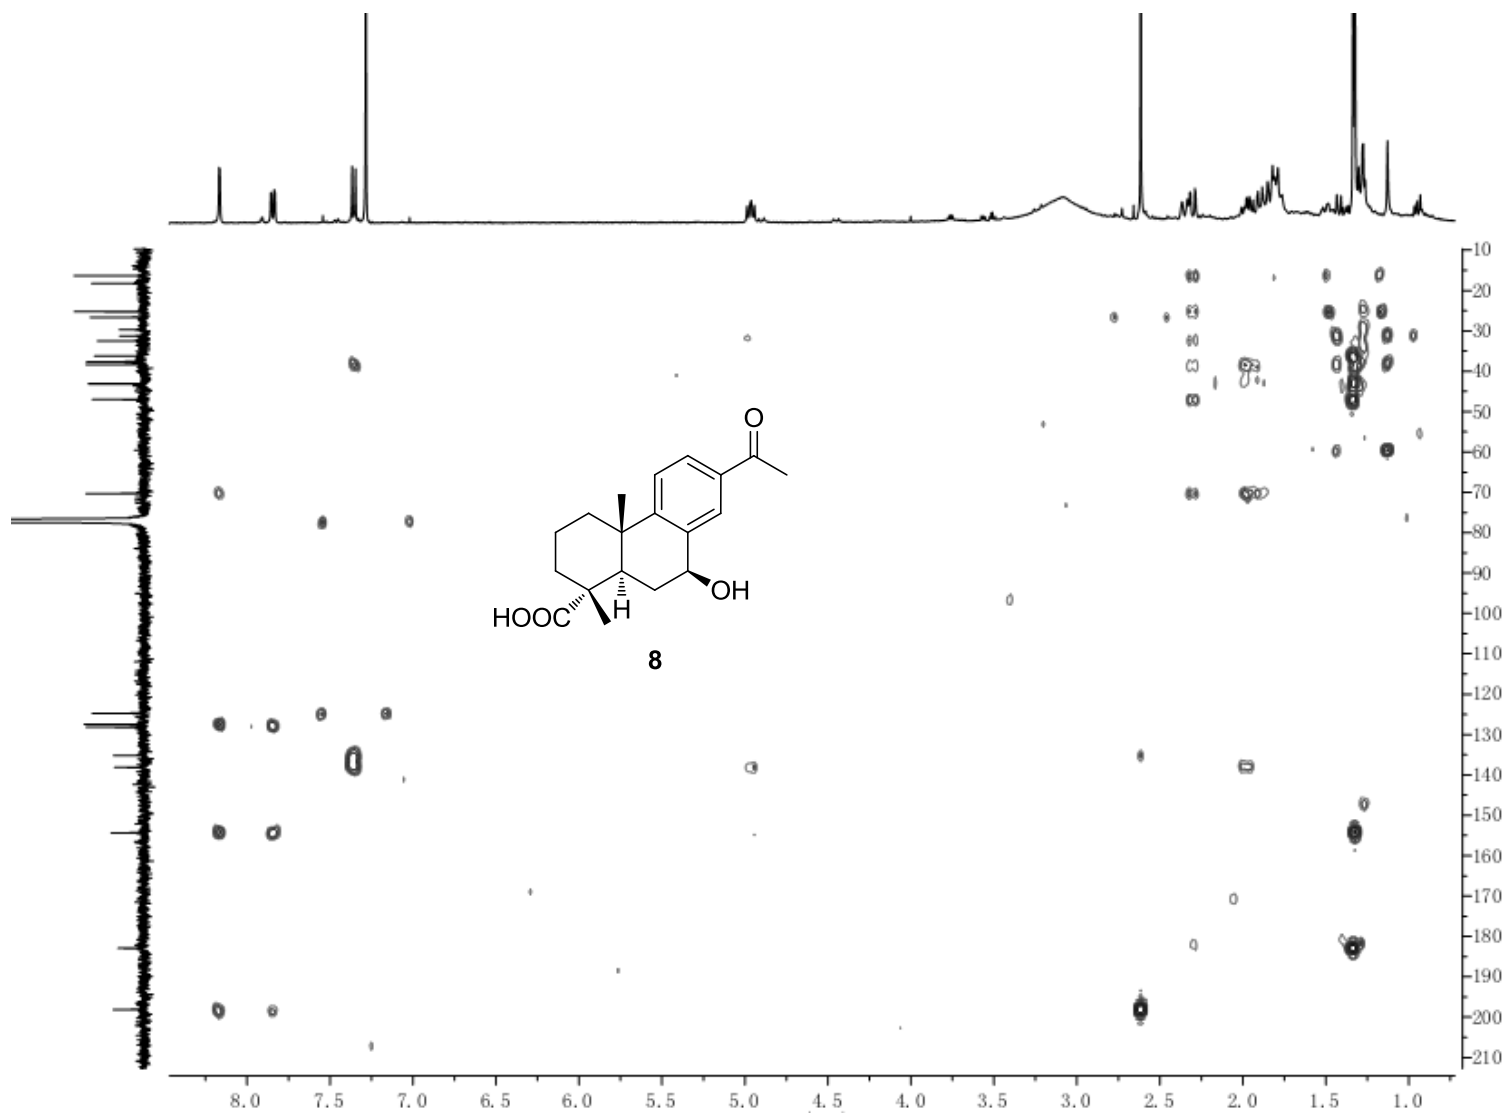



Compound 8: NOESY (CDCl<sub>3</sub>) spectrum

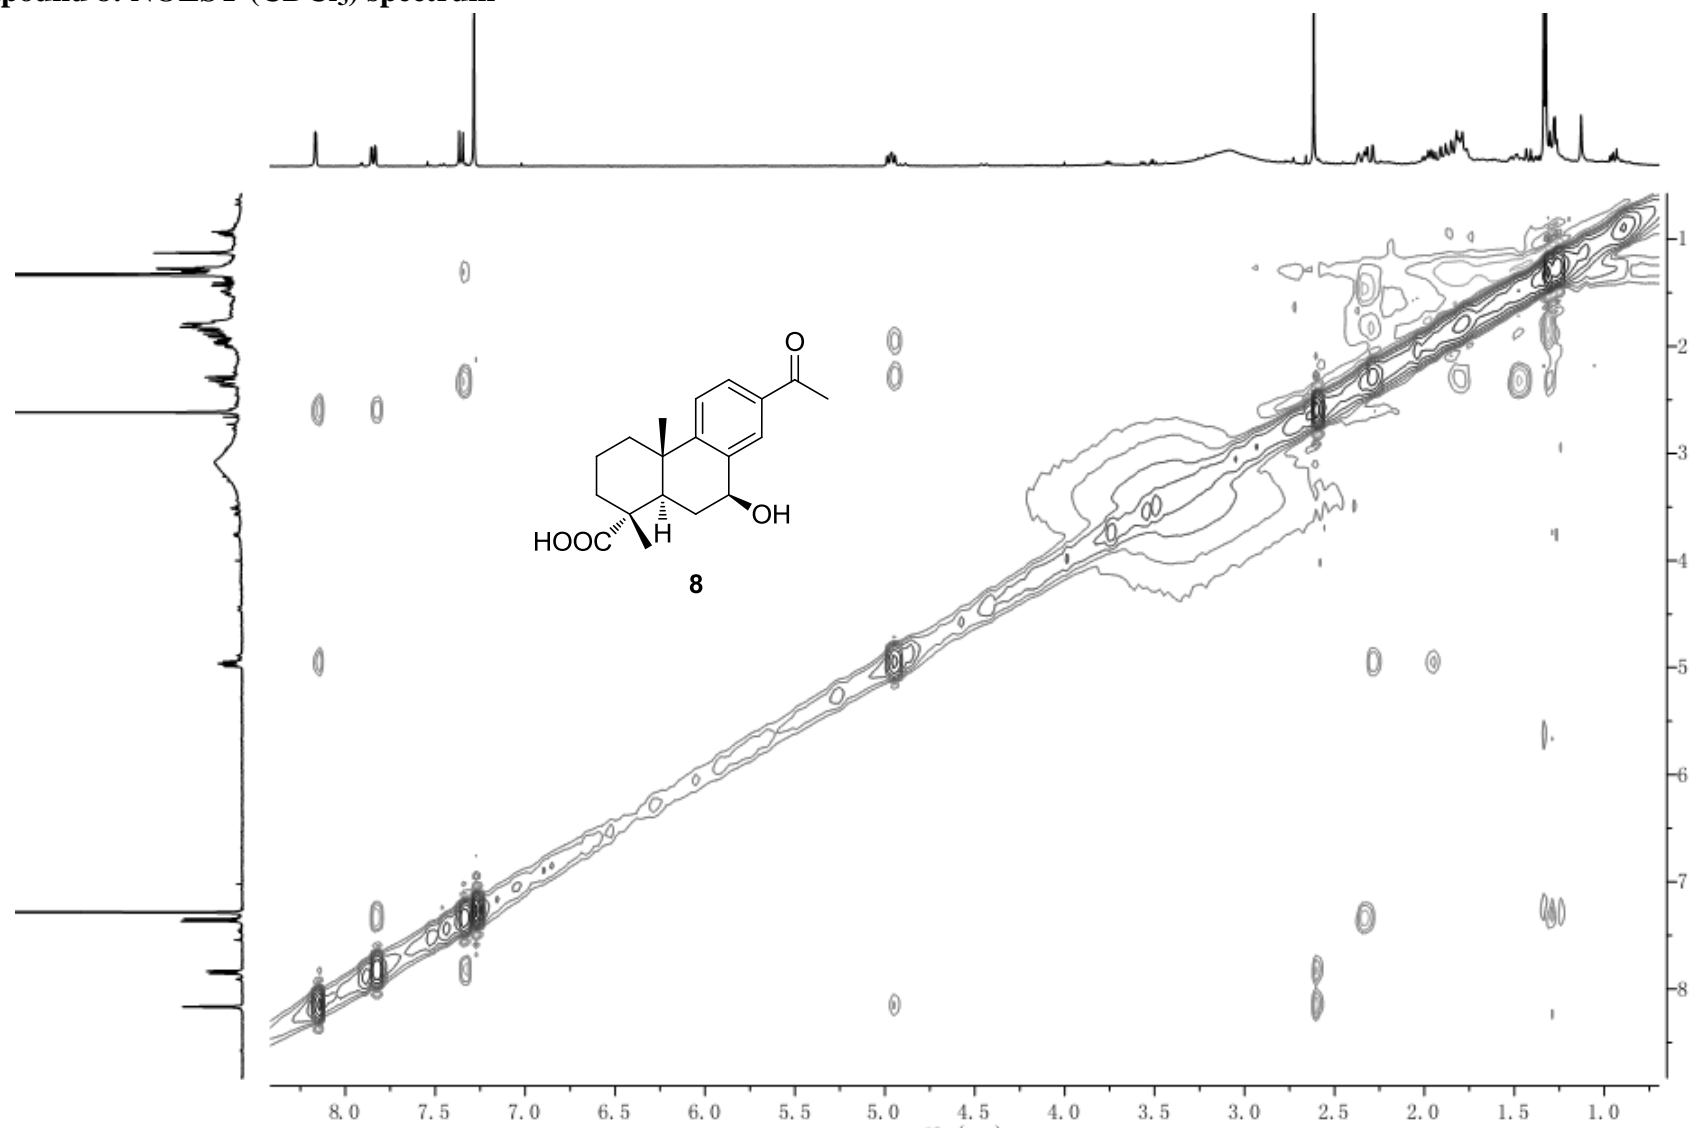

## Compound 8: (+) HR-ESIMS

### Qualitative Analysis Report

|                               |                  |                      |                       |
|-------------------------------|------------------|----------------------|-----------------------|
| <b>Data Filename</b>          | WZS46.d          | <b>Sample Name</b>   | WZS46                 |
| <b>Sample Type</b>            | Sample           | <b>Position</b>      | P1-D4                 |
| <b>Instrument Name</b>        | Instrument 1     | <b>User Name</b>     |                       |
| <b>Acq Method</b>             | general test 2.m | <b>Acquired Time</b> | 12/19/2013 2:43:21 PM |
| <b>IRM Calibration Status</b> | Some Ions Missed | <b>DA Method</b>     | Screening-Default.m   |
| <b>Comment</b>                |                  |                      |                       |

#### User Spectra

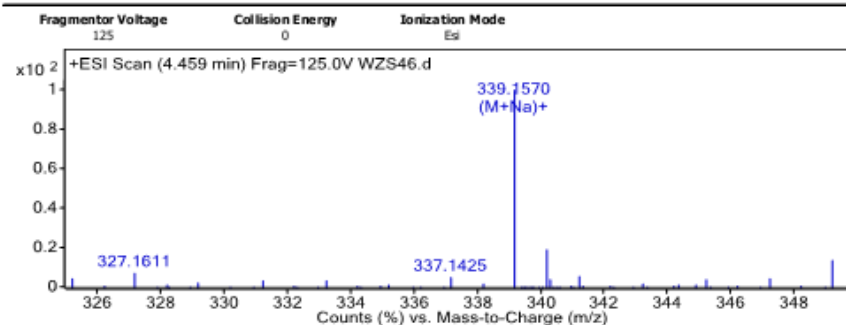

#### Peak List

| m/z     | z | Abund  | Formula       | Ion     |
|---------|---|--------|---------------|---------|
| 339.157 | 1 | 140530 | C19 H24 Na O4 | (M+Na)+ |

#### Formula Calculator Element Limits

| Element | Min | Max |
|---------|-----|-----|
| C       | 3   | 19  |
| H       | 0   | 24  |
| O       | 0   | 4   |
| N       | 0   | 0   |
| S       | 0   | 0   |
| Cl      | 0   | 0   |
| Br      | 0   | 0   |
| Si      | 0   | 0   |
| I       | 0   | 0   |
| P       | 0   | 0   |

#### Formula Calculator Results

| Formula    | Best | Mass     | Tgt Mass | Diff (ppm) | Ion Species   | Score |
|------------|------|----------|----------|------------|---------------|-------|
| C19 H24 O4 | TRUE | 316.1677 | 316.1675 | -0.9       | C19 H24 Na O4 | 90.29 |

-- End Of Report --

Compound 9:  $^1\text{H}$  NMR ( $\text{CDCl}_3$ ) spectrum

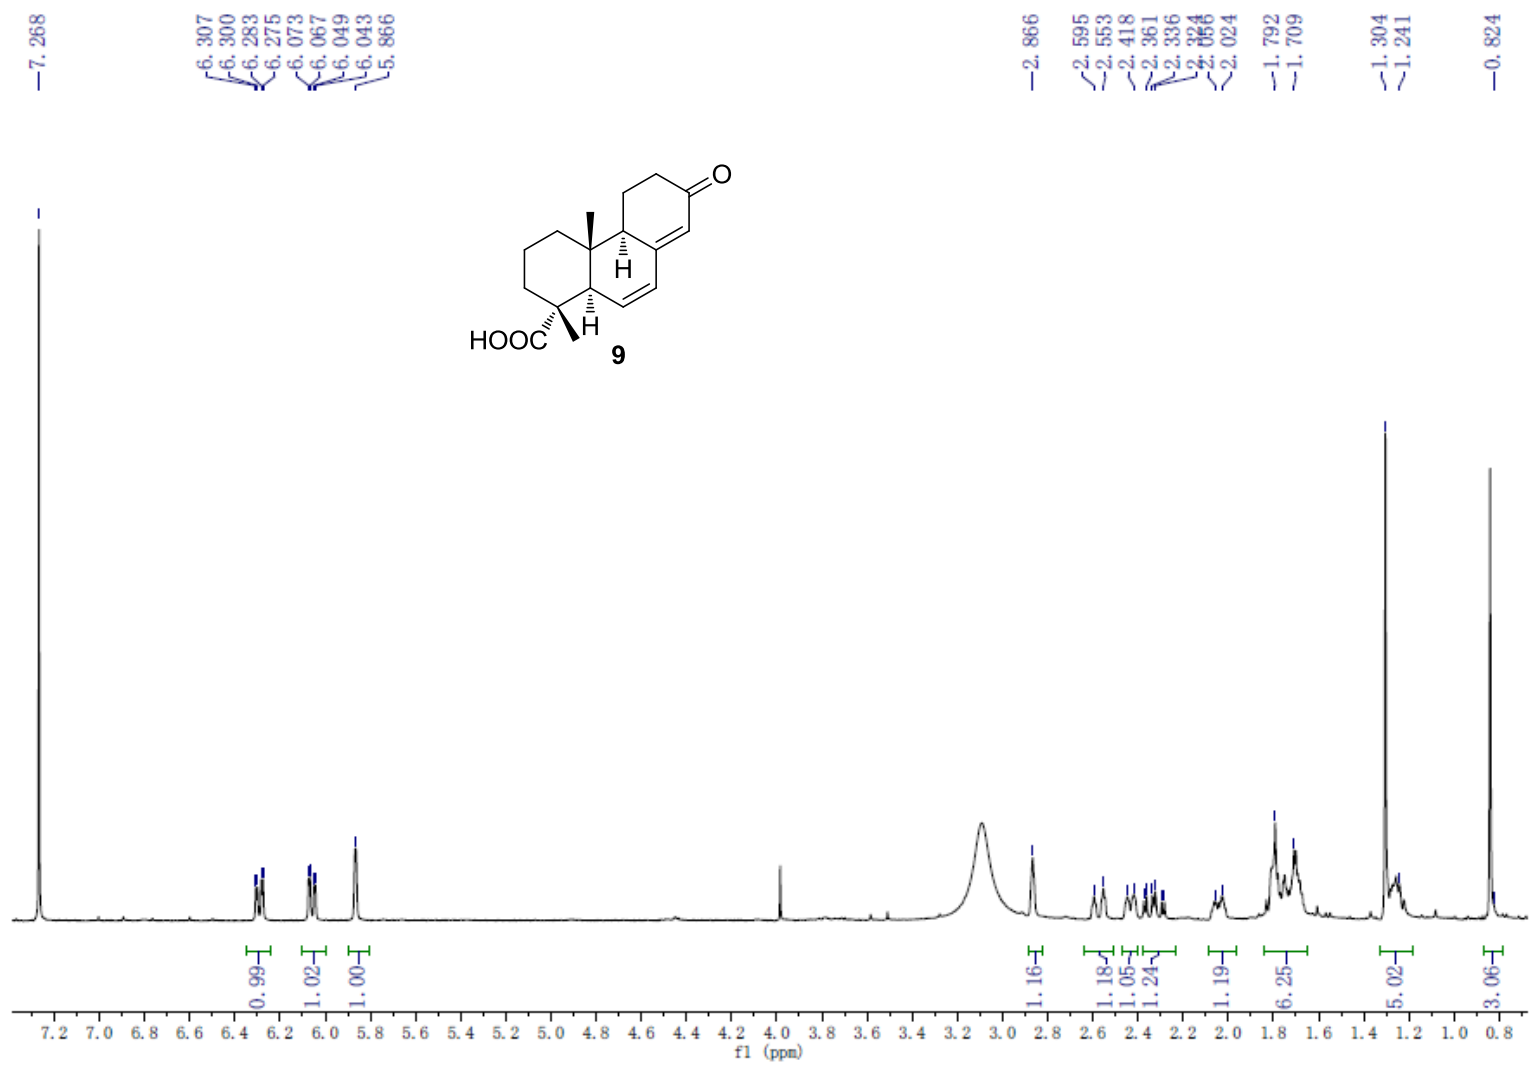

Compound 9:  $^{13}\text{C}$  NMR ( $\text{CDCl}_3$ ) spectrum

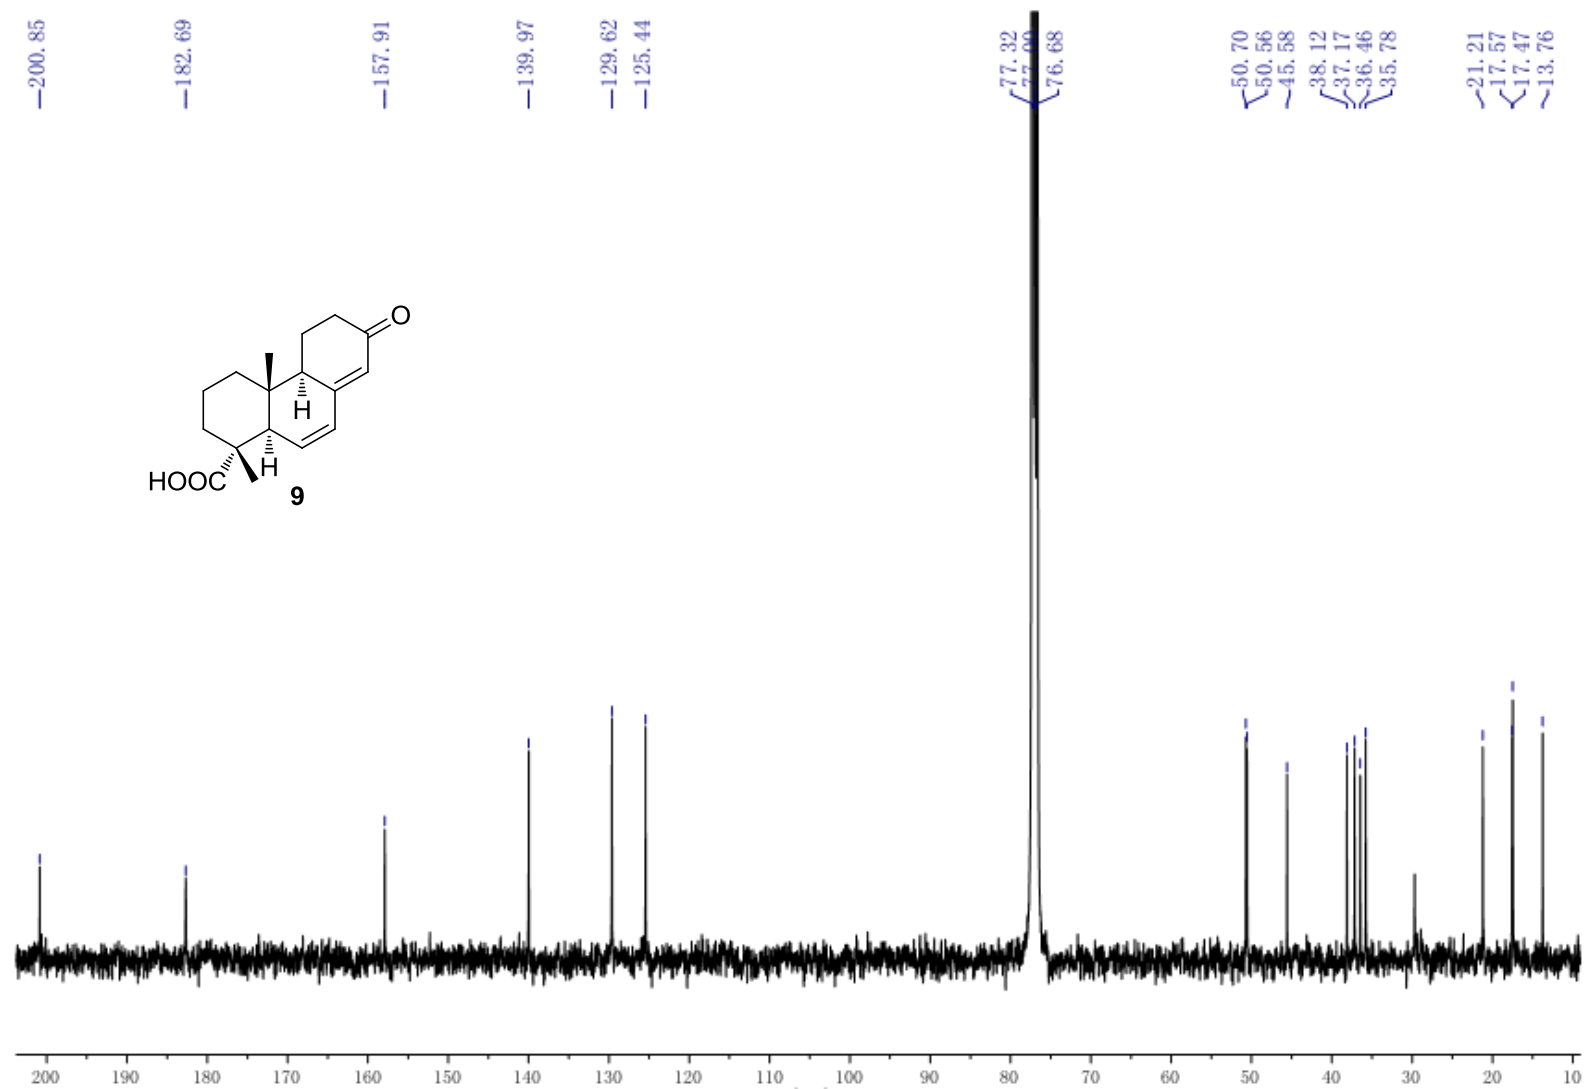

Compound 9:  $^1\text{H}$ - $^1\text{H}$  COSY ( $\text{CDCl}_3$ ) spectrum

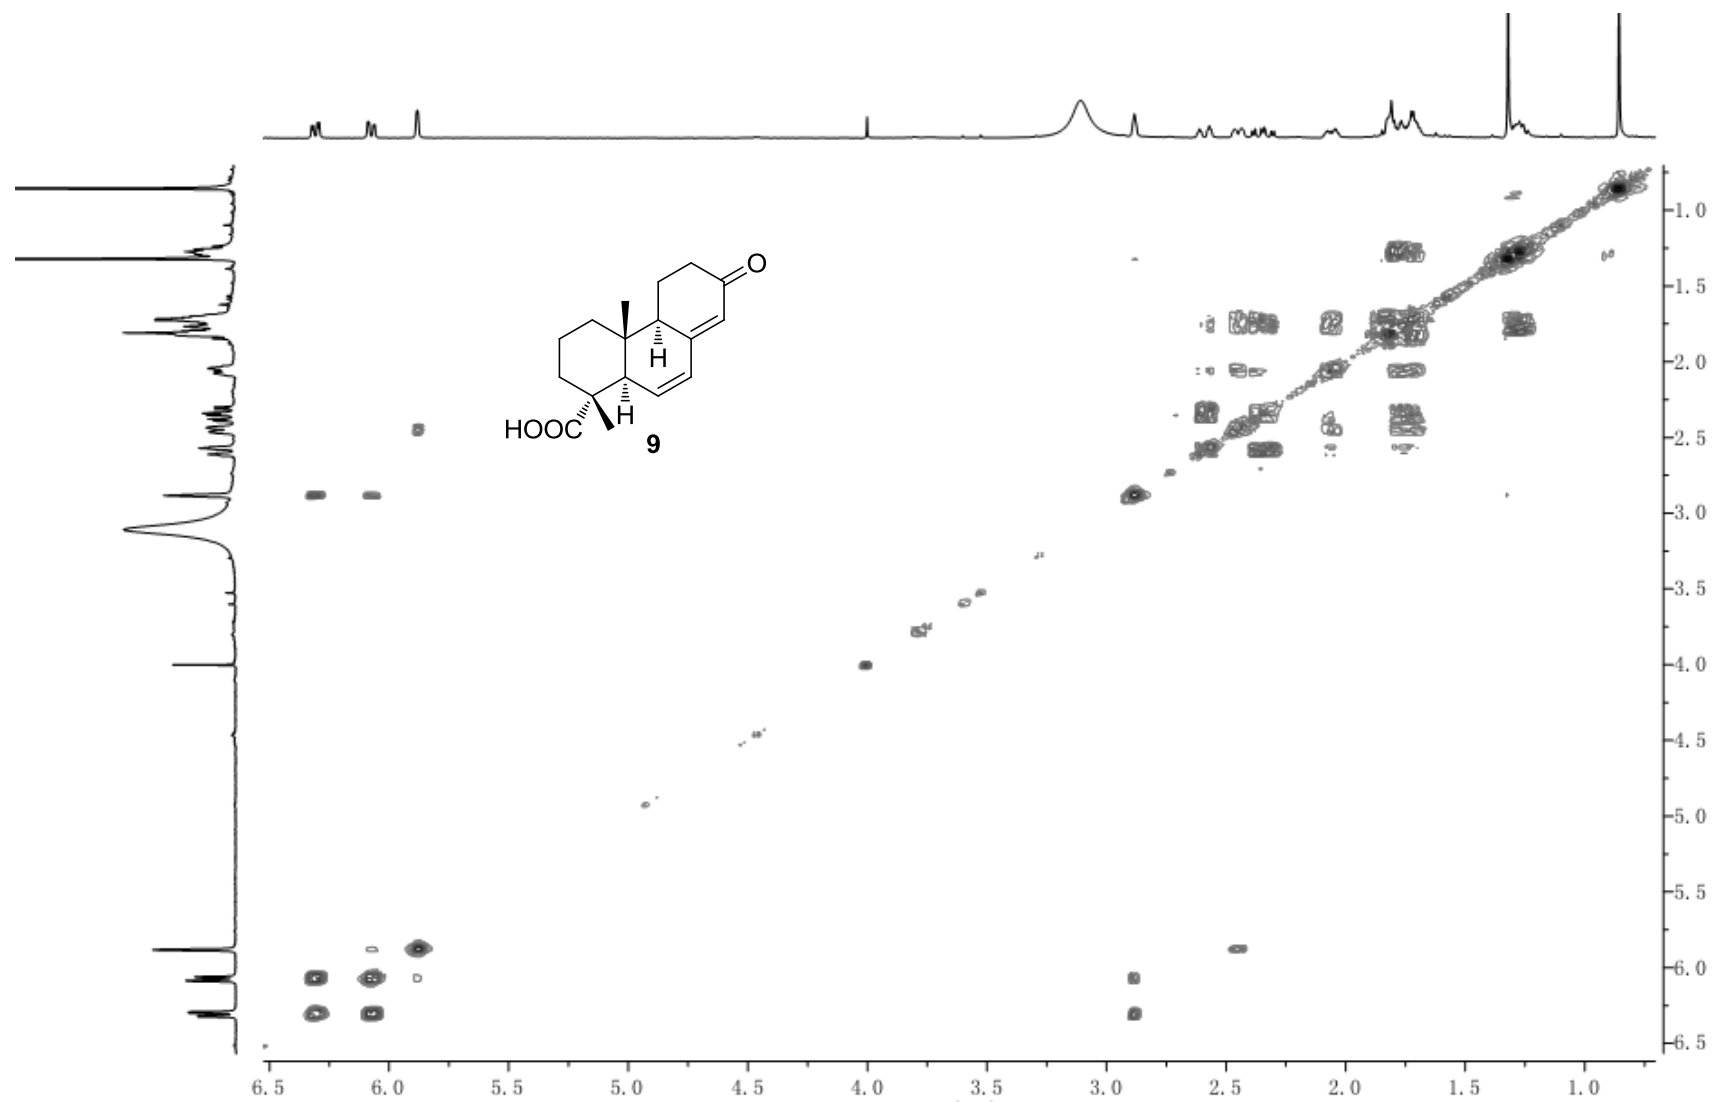

Compound 9: HMBC (CDCl<sub>3</sub>) spectrum

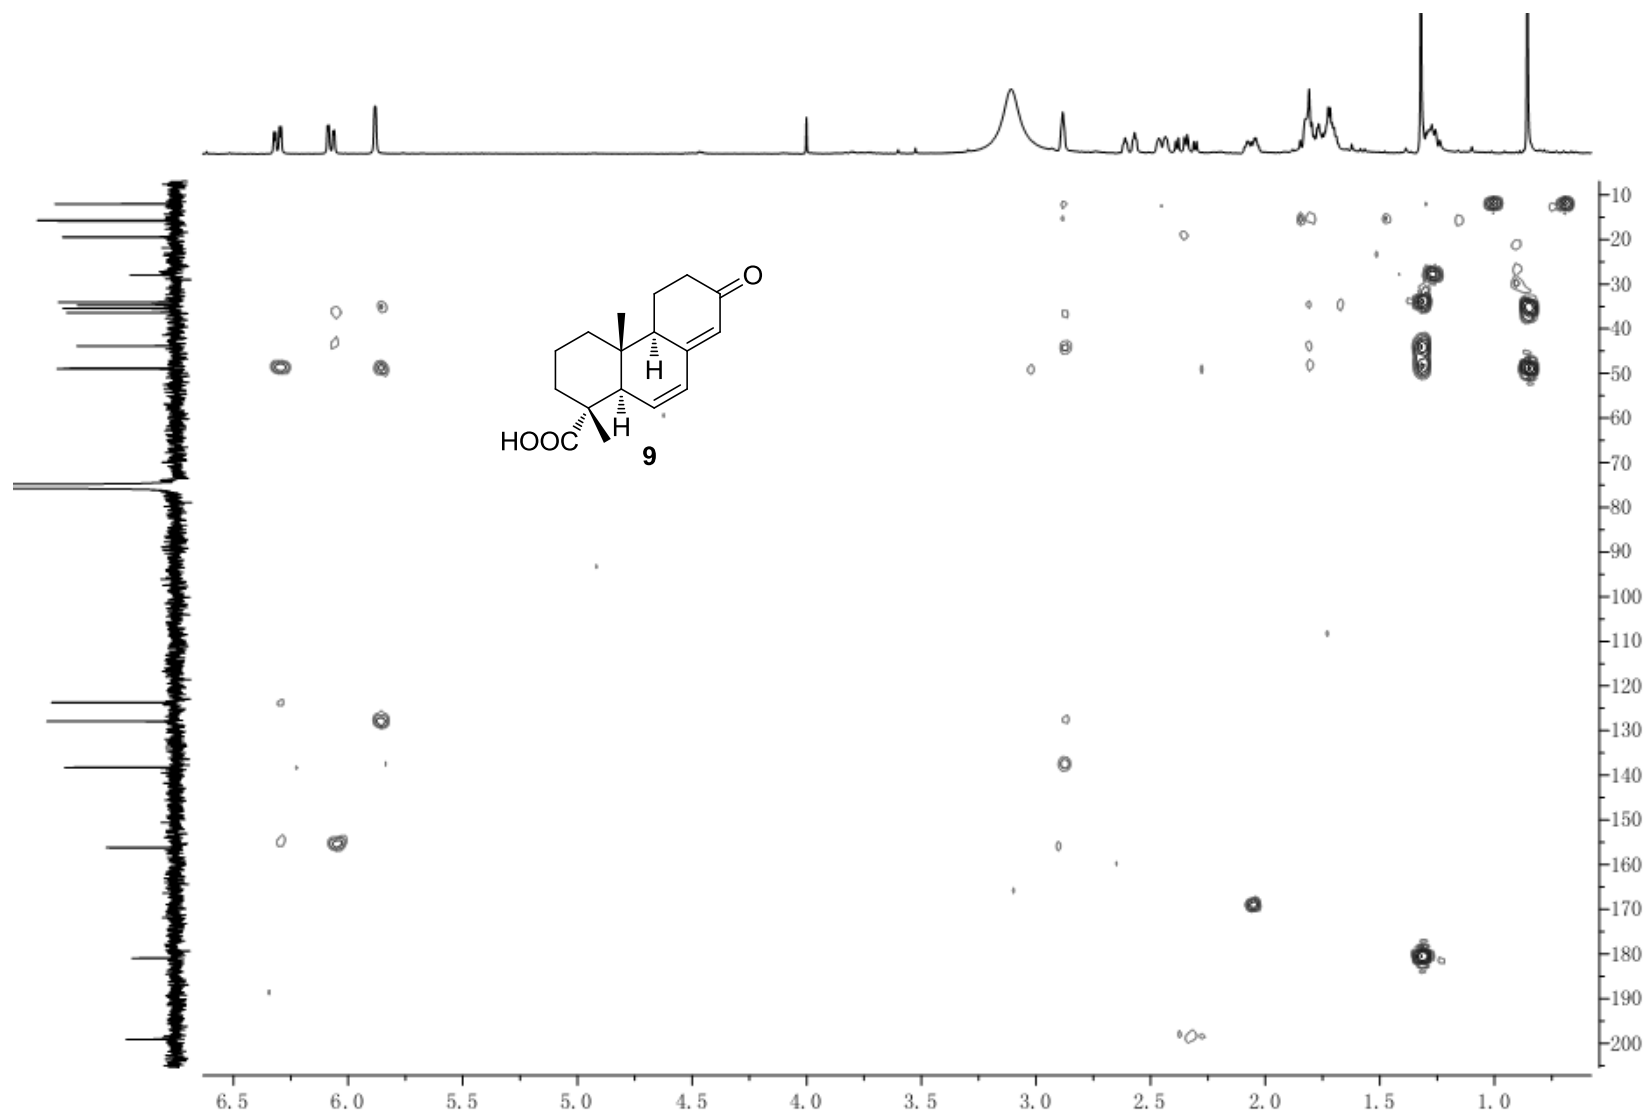

Compound 9: NOESY (CDCl<sub>3</sub>) spectrum

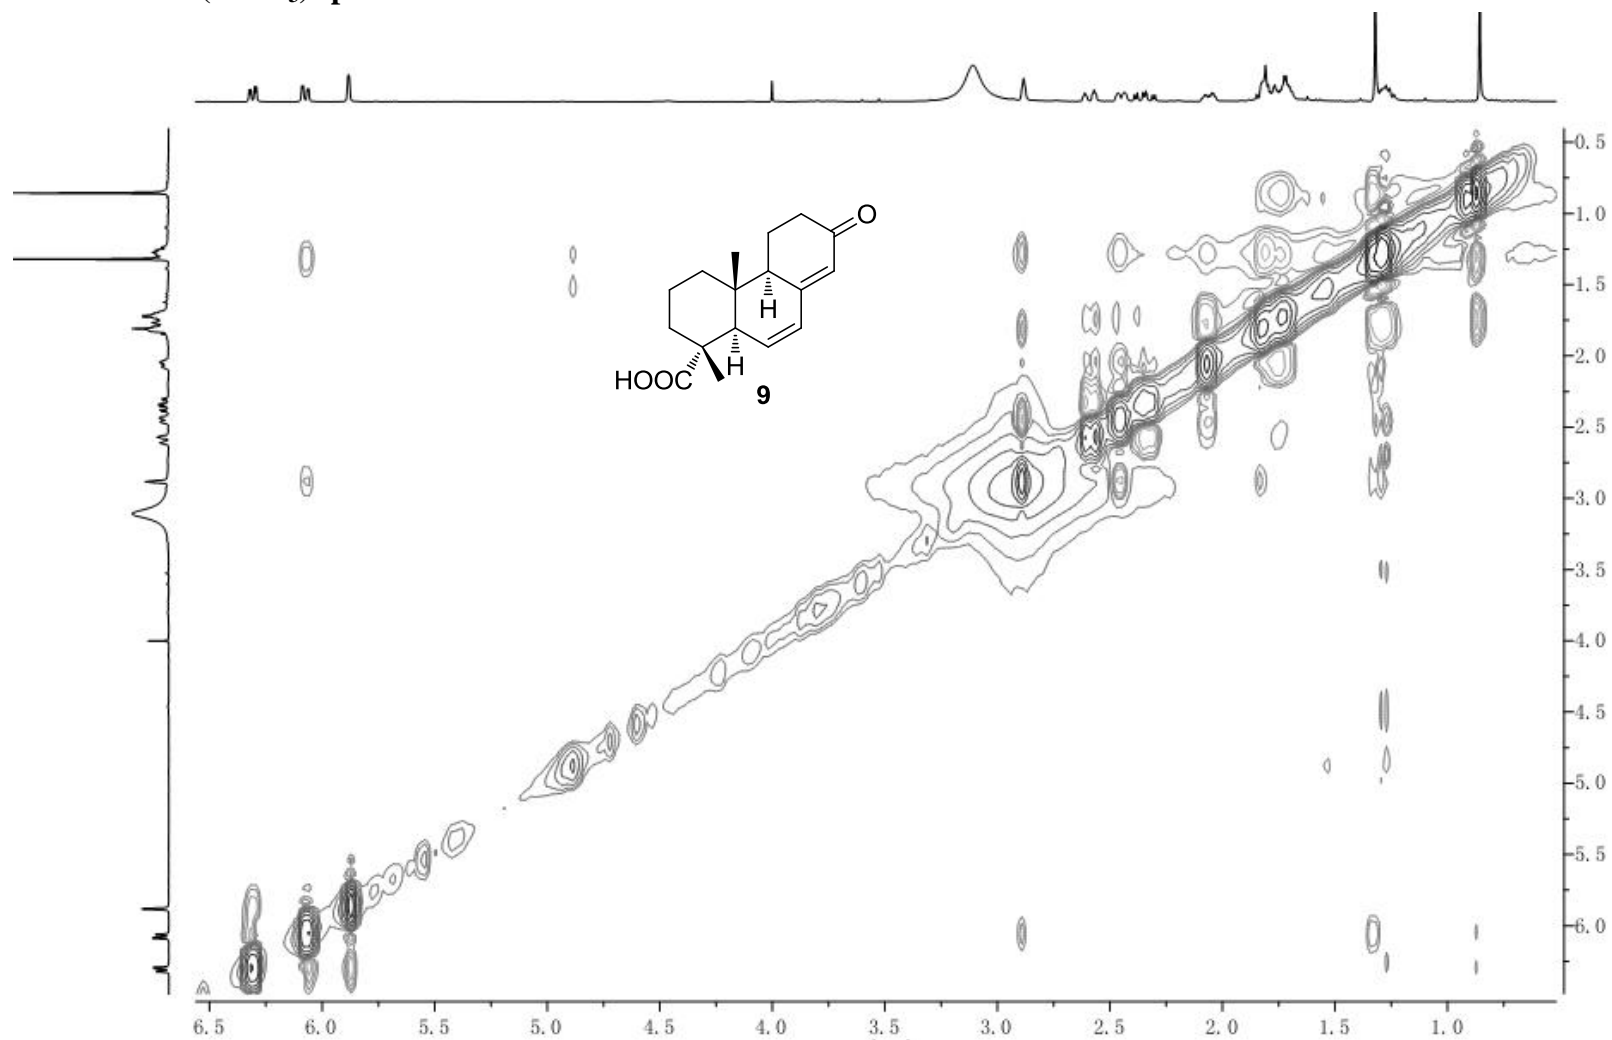

# Compound 9: (+) HR-ESIMS

## Qualitative Analysis Report

|                               |                  |                      |                       |
|-------------------------------|------------------|----------------------|-----------------------|
| <b>Data Filename</b>          | WL32.d           | <b>Sample Name</b>   | WL32                  |
| <b>Sample Type</b>            | Sample           | <b>Position</b>      | P1-C6                 |
| <b>Instrument Name</b>        | Instrument 1     | <b>User Name</b>     |                       |
| <b>Acq Method</b>             | general test 2.m | <b>Acquired Time</b> | 12/19/2013 4:09:22 PM |
| <b>IRM Calibration Status</b> | Some Ions Missed | <b>DA Method</b>     | Screening-Default.m   |
| <b>Comment</b>                |                  |                      |                       |

### User Spectra

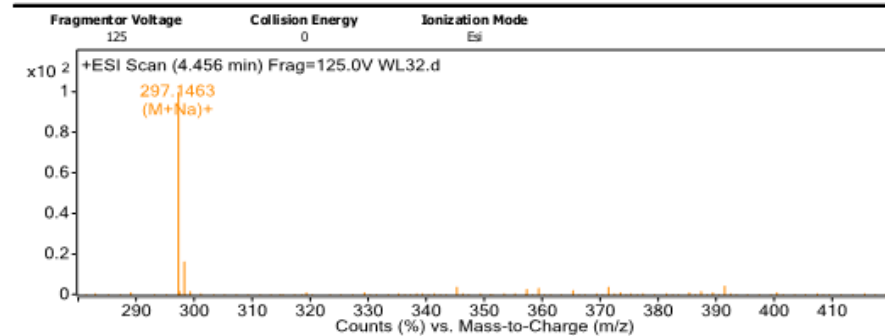

### Peak List

| m/z      | z | Abund  | Formula       | Ion     |
|----------|---|--------|---------------|---------|
| 297.1463 | 1 | 927320 | C17 H22 Na O3 | (M+Na)+ |

### Formula Calculator Element Limits

| Element | Min | Max |
|---------|-----|-----|
| C       | 3   | 60  |
| H       | 0   | 120 |
| O       | 0   | 90  |
| N       | 0   | 1   |
| S       | 0   | 0   |
| Cl      | 0   | 0   |
| Br      | 0   | 0   |
| Si      | 0   | 0   |

### Formula Calculator Results

| Formula    | Best | Mass     | Tgt Mass | Diff (ppm) | Ion Species   | Score |
|------------|------|----------|----------|------------|---------------|-------|
| C17 H22 O3 | TRUE | 274.1571 | 274.1569 | -0.79      | C17 H22 Na O3 | 98.47 |

--- End Of Report ---



Compound 10:  $^1\text{H}$  NMR ( $\text{CDCl}_3$ ) spectrum

7.268

5.347  
5.335

2.723  
2.715  
2.706  
2.691  
2.683  
2.679  
2.672  
2.651  
2.640  
2.629  
1.994  
1.951  
1.869  
1.834  
1.764  
1.683  
1.559  
1.550  
1.334  
1.325  
1.273  
0.888  
0.775

0.006

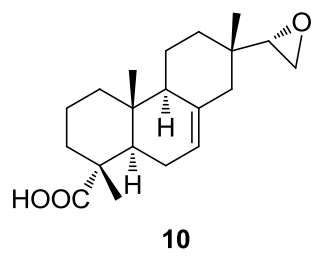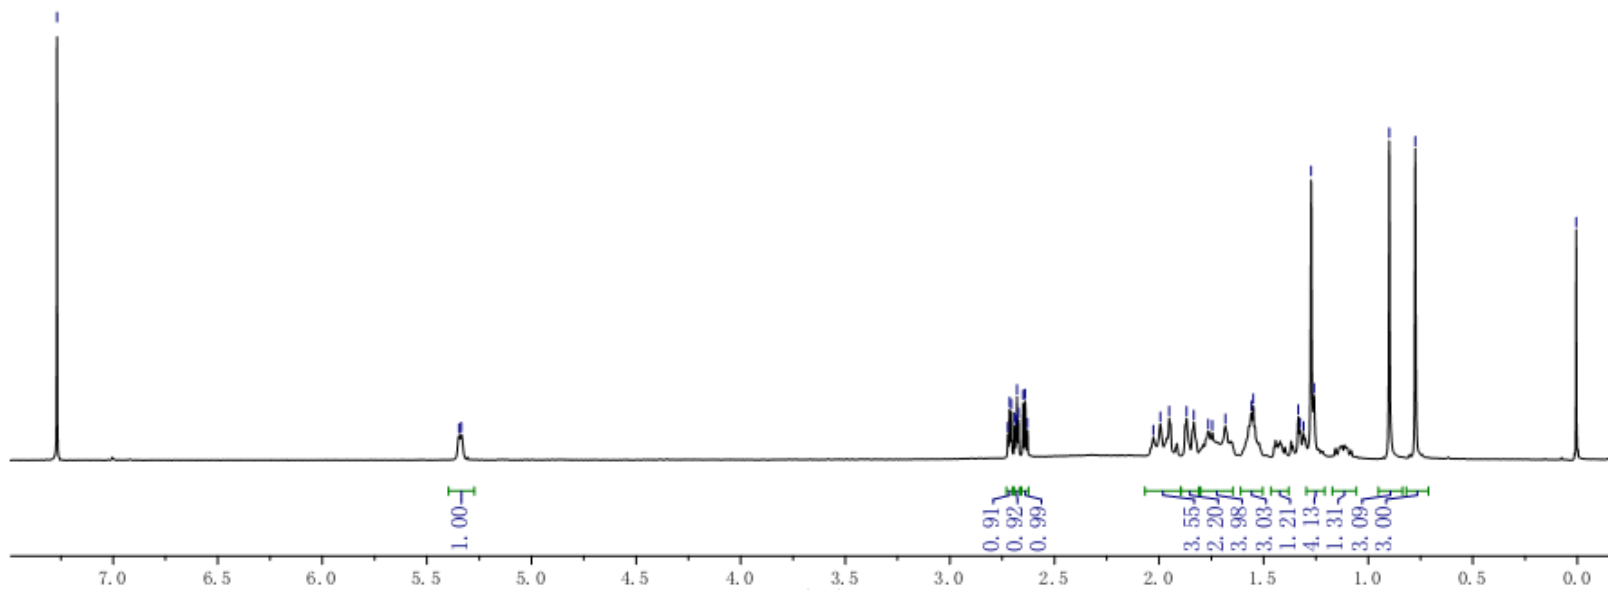

Compound 10:  $^1\text{H}$  NMR ( $\text{CDCl}_3$ ) spectrum-Expansion

2.723  
2.715  
2.706  
2.691  
2.683  
2.679  
2.672  
2.651  
2.640  
2.629

2.027  
1.994  
1.951

1.869  
1.834

1.764  
1.746  
1.683

1.559  
1.550

1.334  
1.325  
1.309  
1.273  
1.259

0.899

0.775

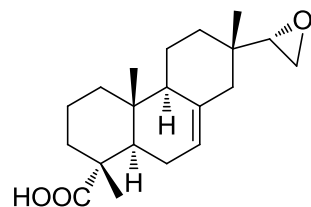

10

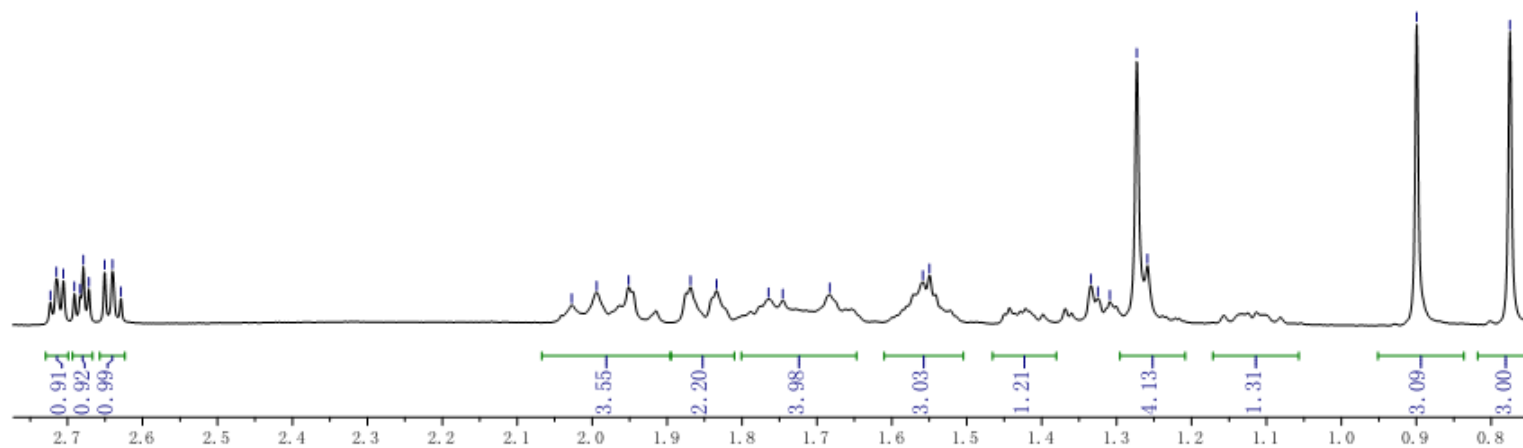

Compound 10:  $^{13}\text{C}$  NMR ( $\text{CDCl}_3$ ) spectrum

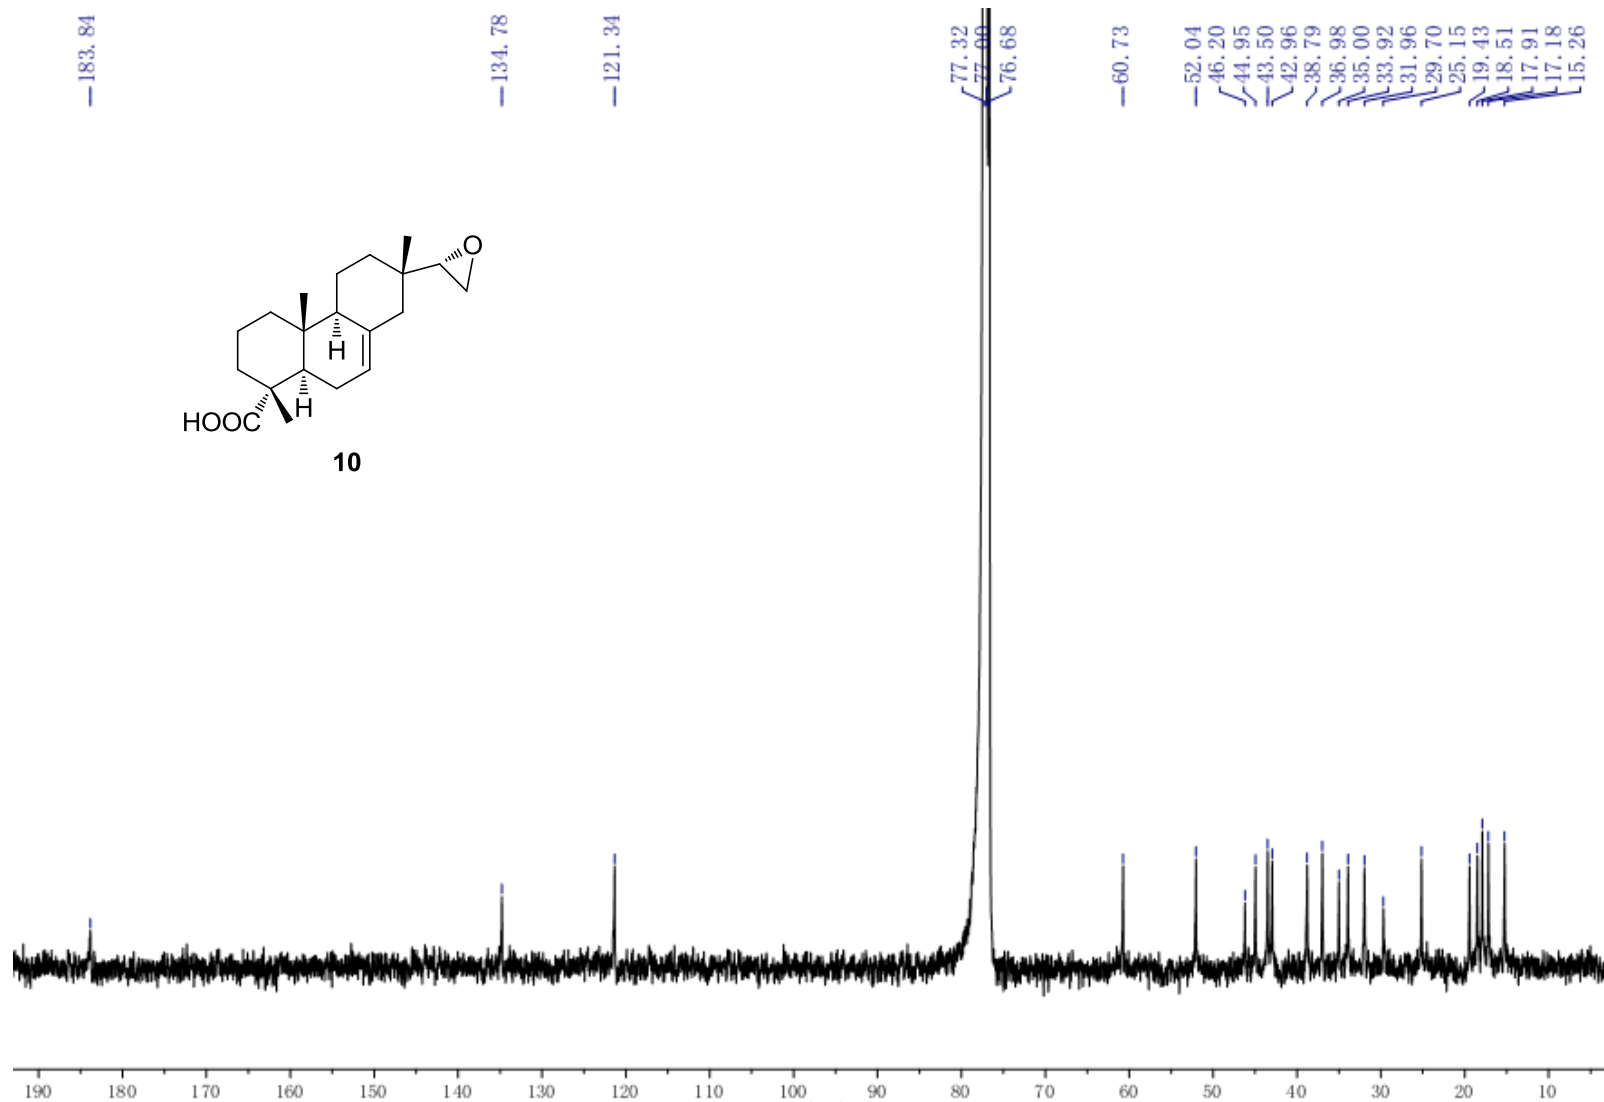

**Compound 10: HSQC (CDCl<sub>3</sub>) spectrum**

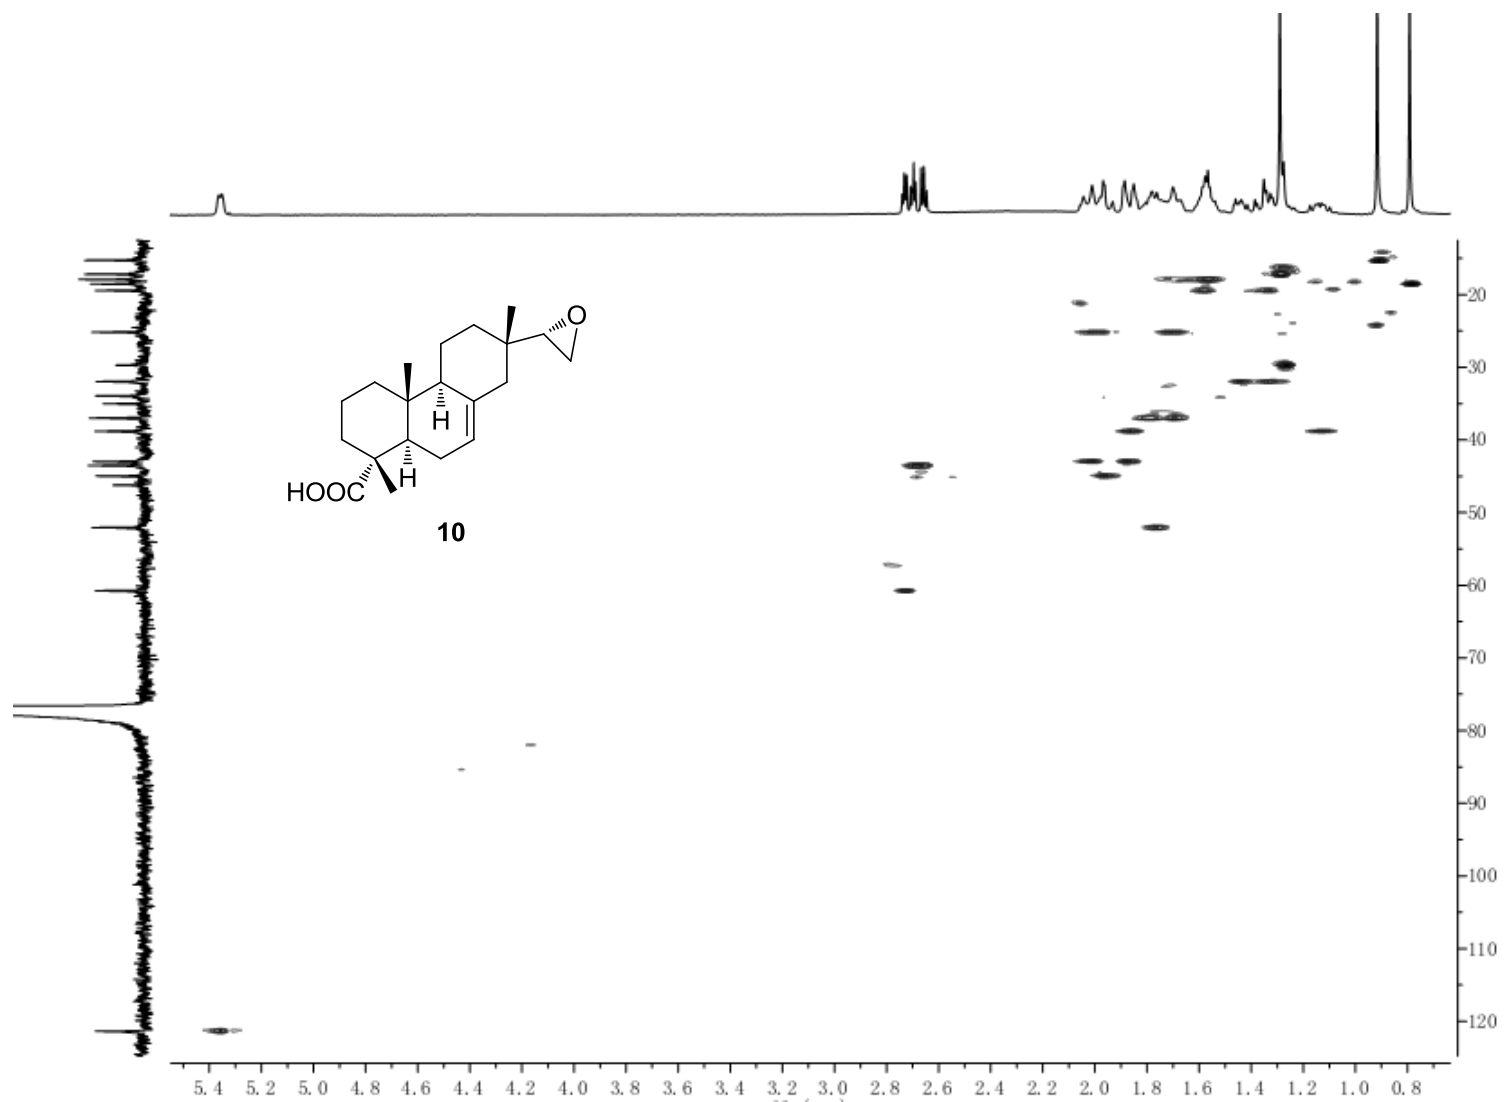

**Compound 10: NOESY (CDCl<sub>3</sub>) spectrum**

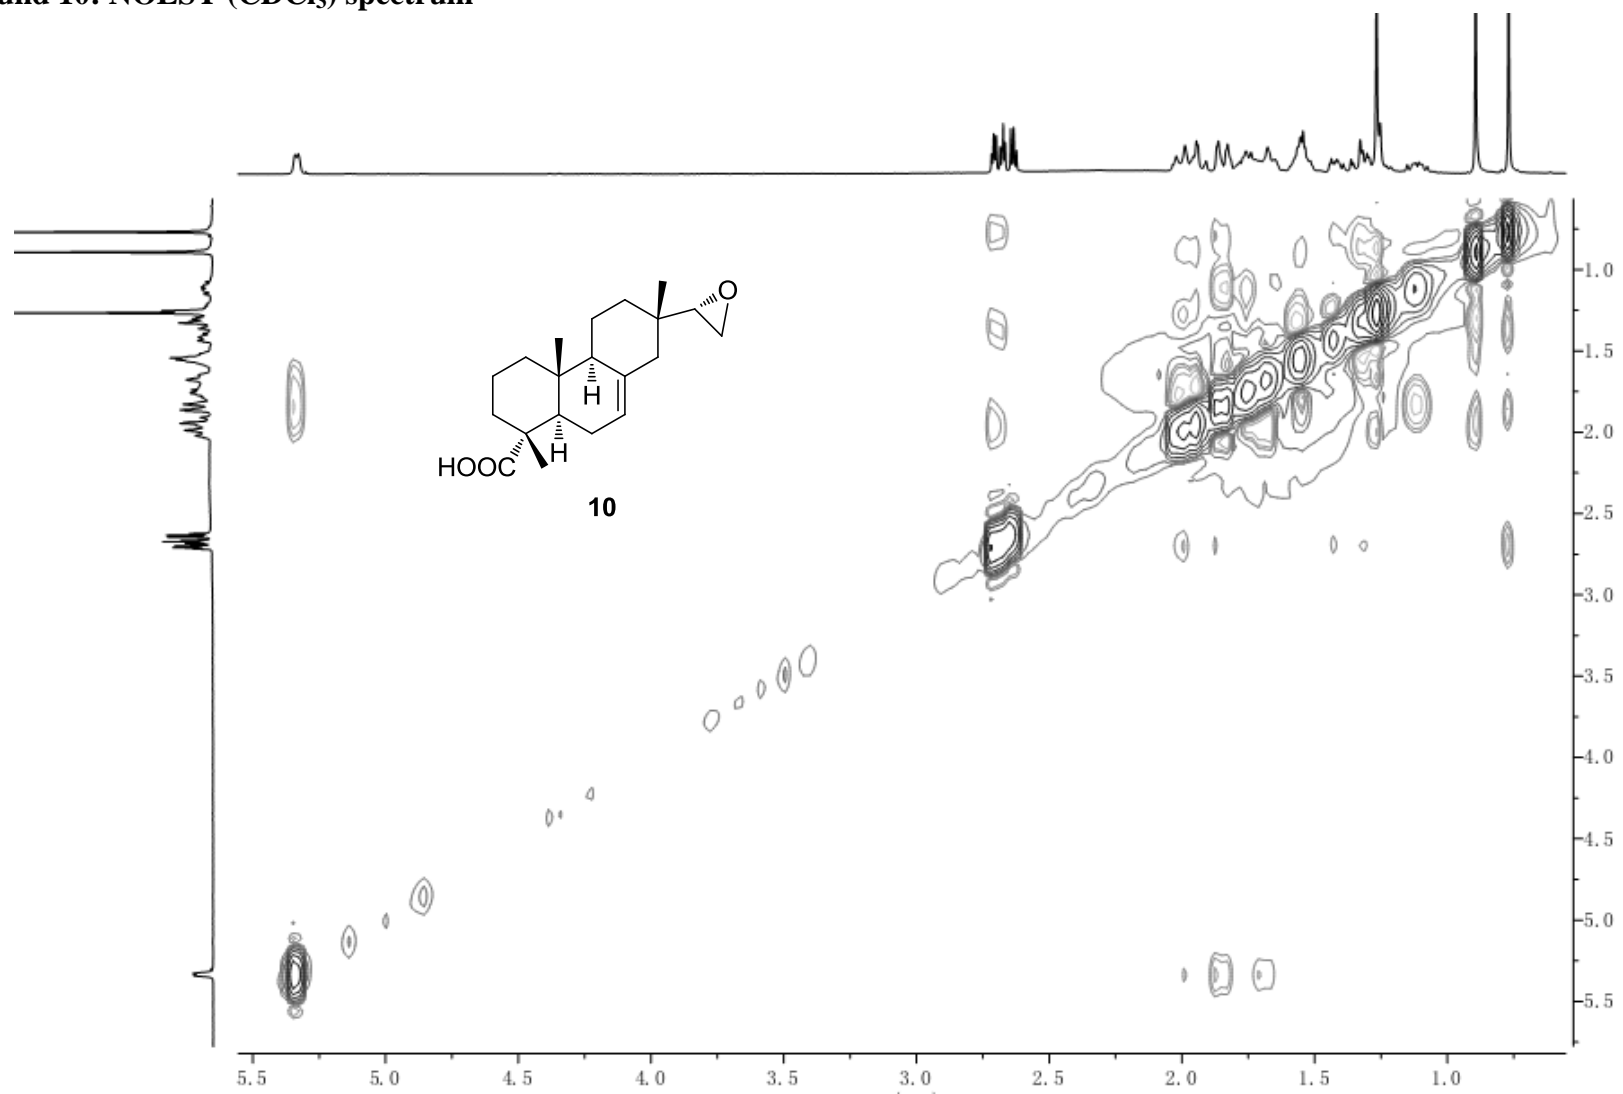

# Compound 10: (+) HR-ESIMS

## Qualitative Analysis Report

|                               |                  |                      |                       |
|-------------------------------|------------------|----------------------|-----------------------|
| <b>Data Filename</b>          | WZS161-1.d       | <b>Sample Name</b>   | WZS161                |
| <b>Sample Type</b>            | Sample           | <b>Position</b>      | P1-D8                 |
| <b>Instrument Name</b>        | Instrument 1     | <b>User Name</b>     |                       |
| <b>Acq Method</b>             | general test 2.m | <b>Acquired Time</b> | 12/19/2013 5:29:53 PM |
| <b>IRM Calibration Status</b> | Some Ions Missed | <b>DA Method</b>     | Screening-Default.m   |
| <b>Comment</b>                |                  |                      |                       |

### User Spectra

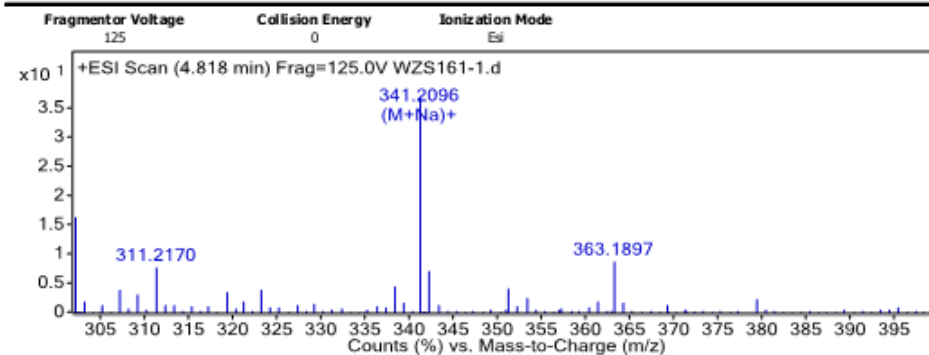

### Peak List

| m/z      | z | Abund   |
|----------|---|---------|
| 301.1423 | 1 | 1587864 |

### Formula Calculator Element Limits

| Element | Min | Max |
|---------|-----|-----|
| C       | 3   | 60  |
| H       | 0   | 120 |
| O       | 0   | 30  |
| N       | 0   | 1   |
| S       | 0   | 0   |
| Cl      | 0   | 0   |
| Br      | 0   | 0   |
| Si      | 0   | 0   |

### Formula Calculator Results

| Formula    | Best | Mass     | Tgt Mass | Diff (ppm) | Ion Species   | Score |
|------------|------|----------|----------|------------|---------------|-------|
| C20 H30 O3 | TRUE | 318.2203 | 318.2195 | -2.67      | C20 H30 Na O3 | 96.09 |

--- End Of Report ---

Compound 11:  $^1\text{H}$  NMR ( $\text{CDCl}_3$ ) spectrum

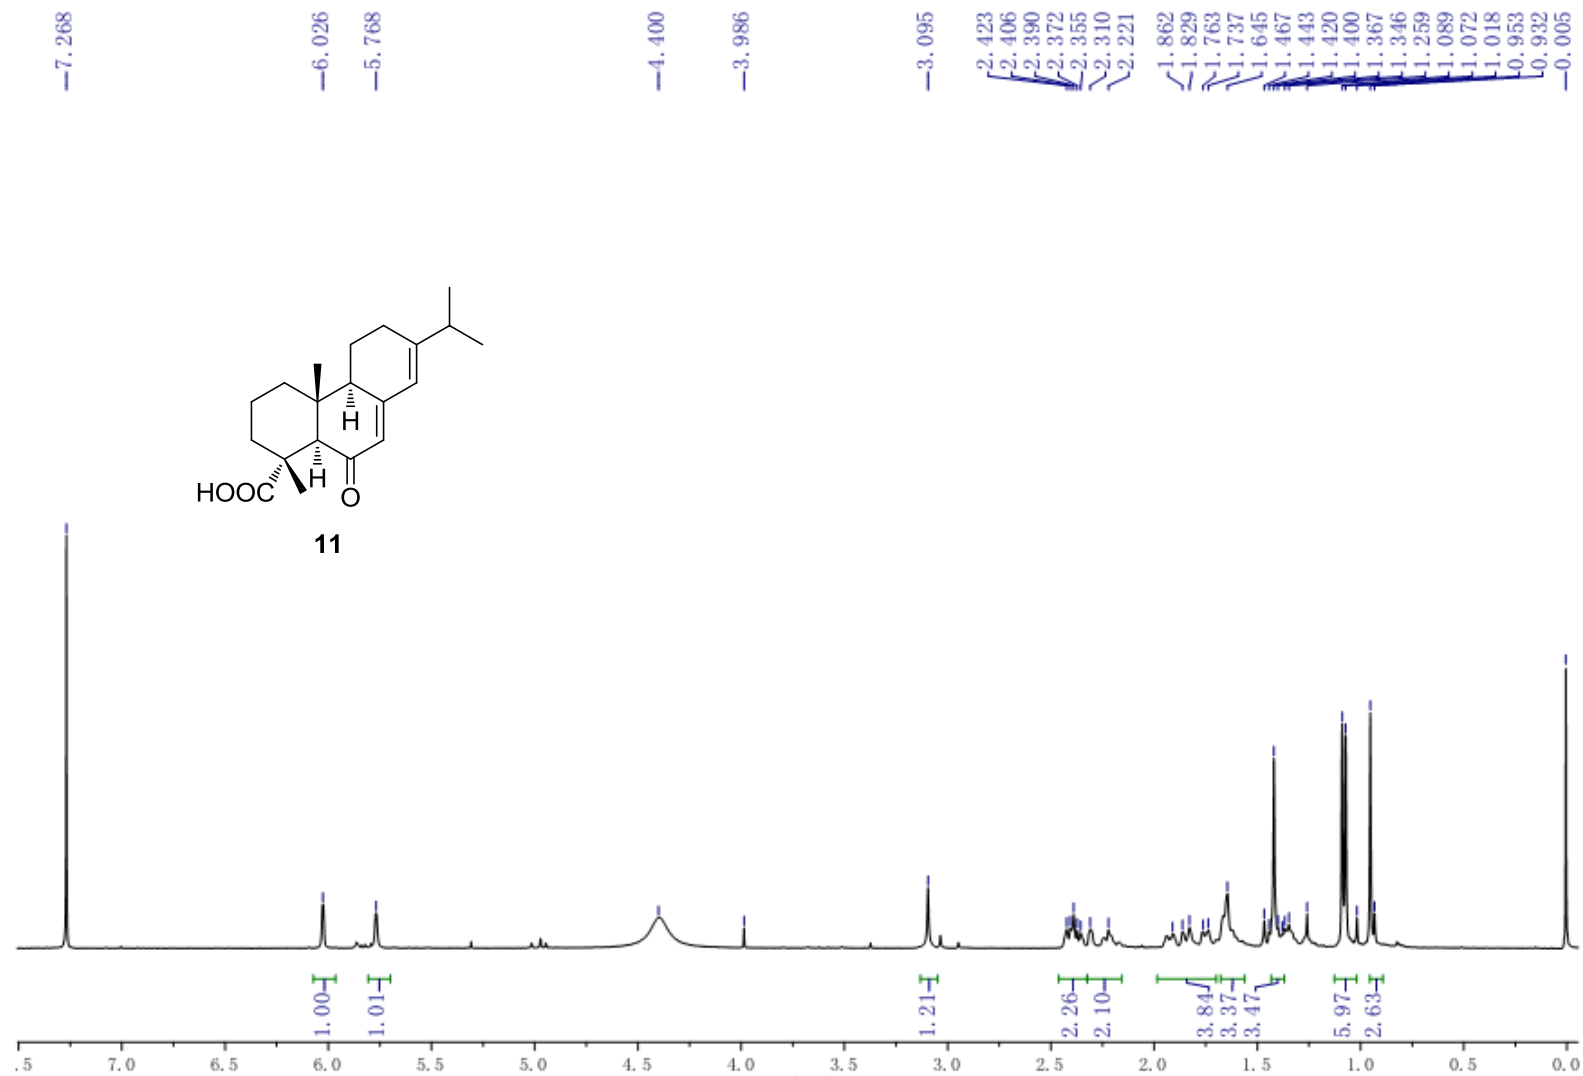

Compound 11:  $^{13}\text{C}$  NMR and DEPT( $\text{CDCl}_3$ ) spectrum

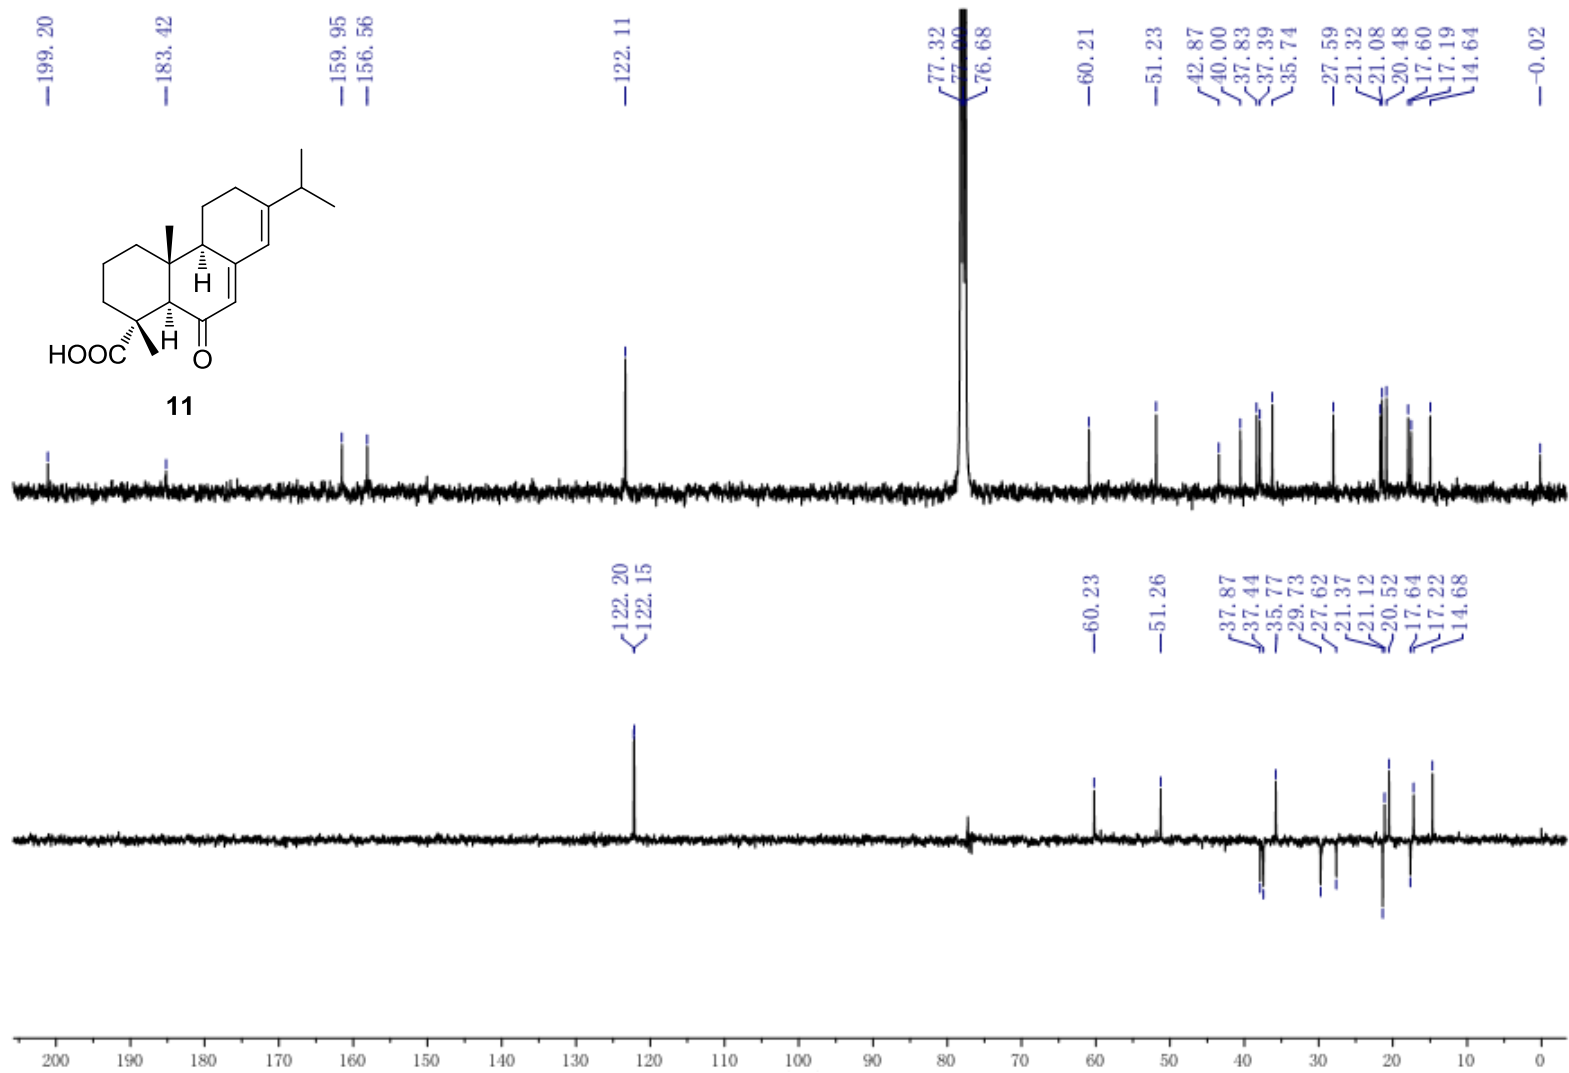



**Compound 11: HSQC (CDCl<sub>3</sub>) spectrum**

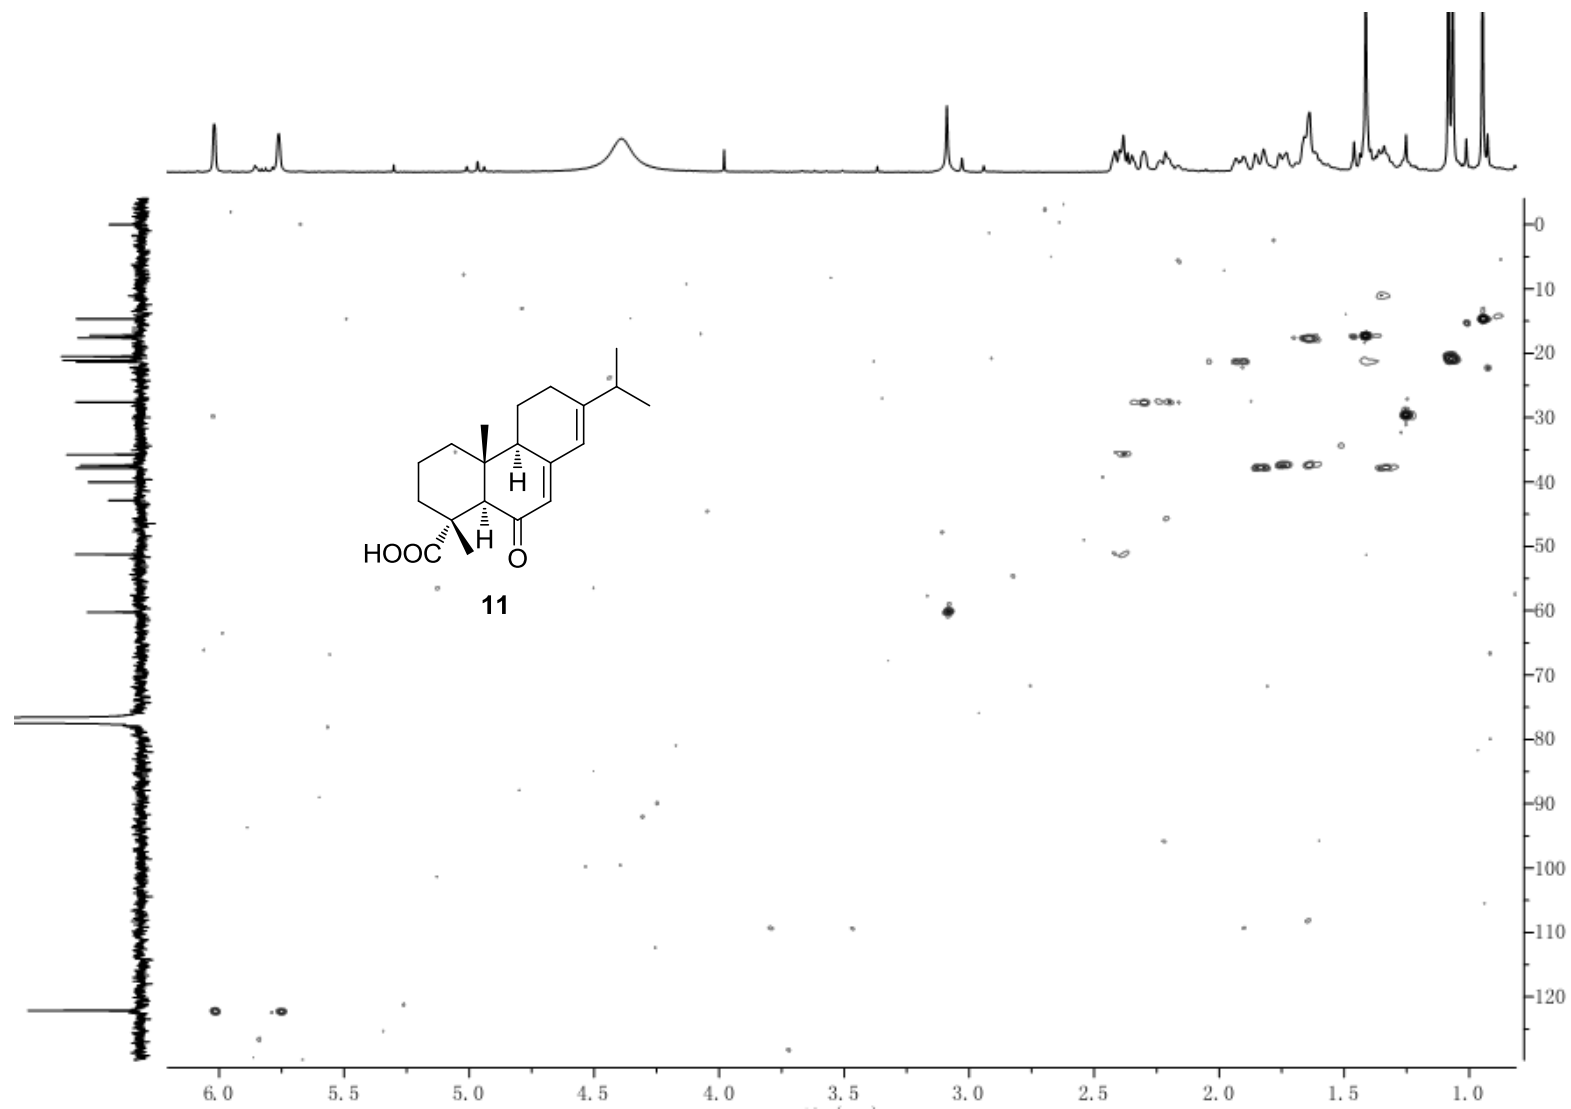

Compound 11: HMBC (CDCl<sub>3</sub>) spectrum

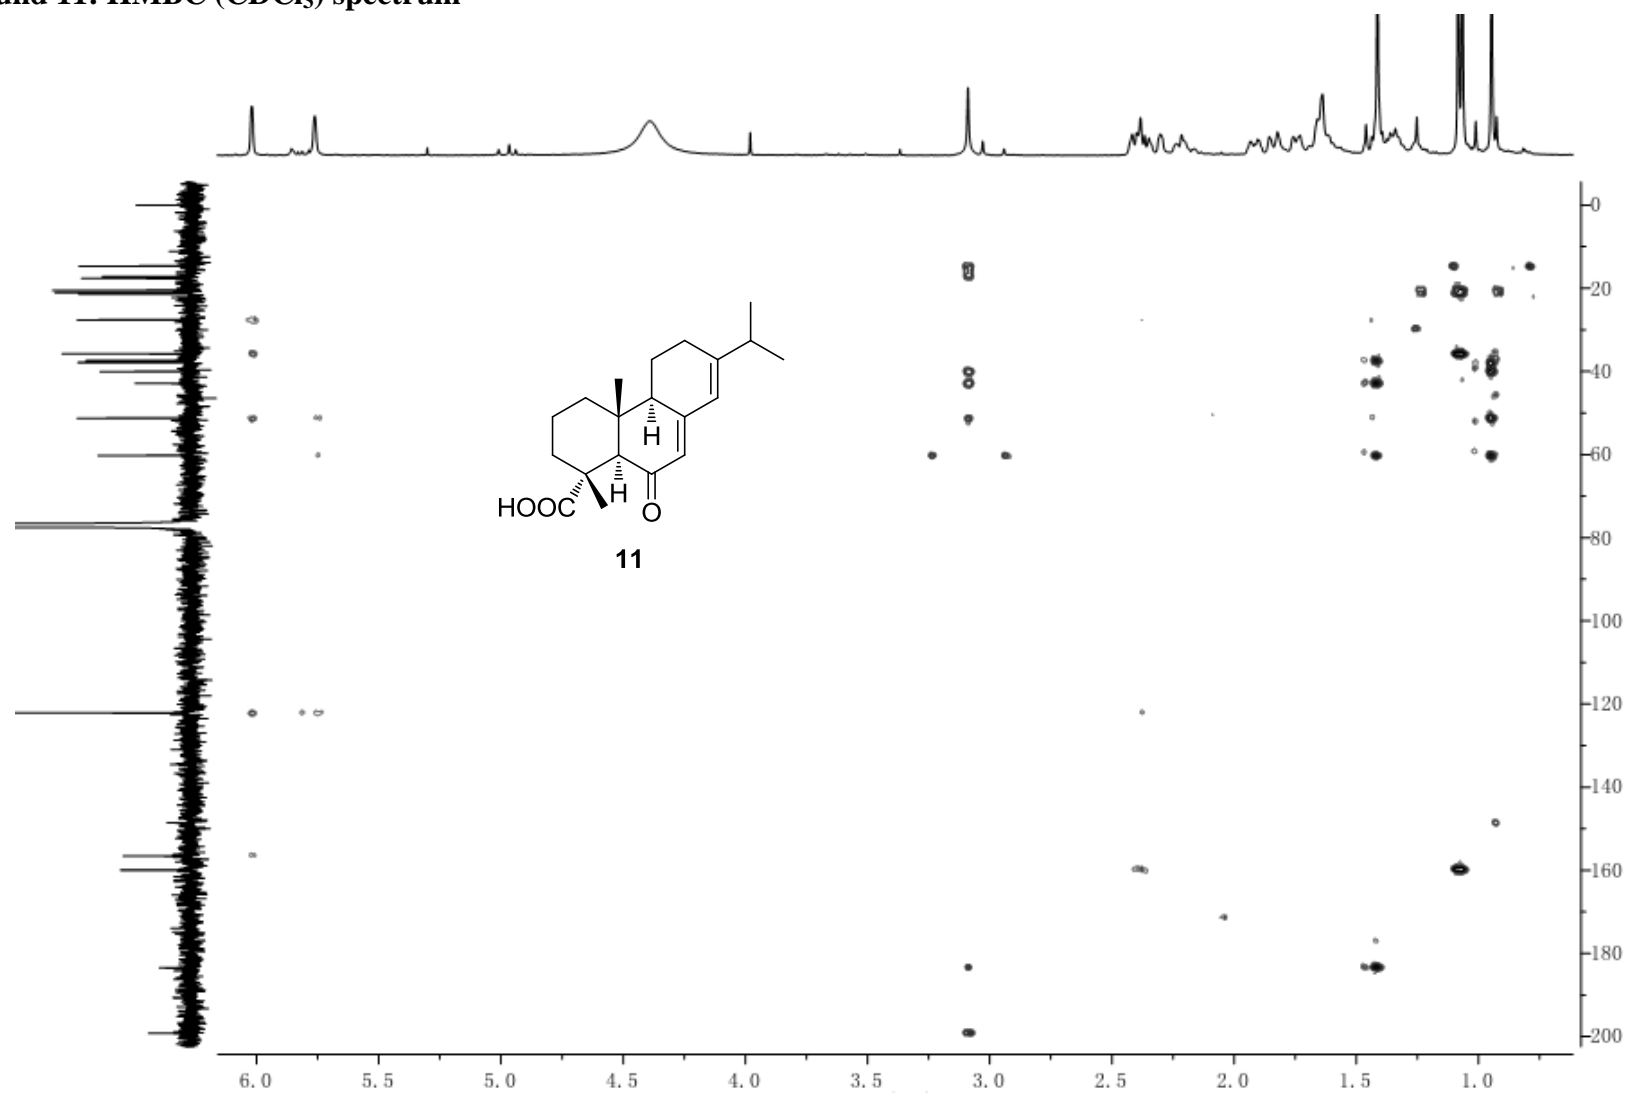

Compound 11: (+) HR-ESIMS

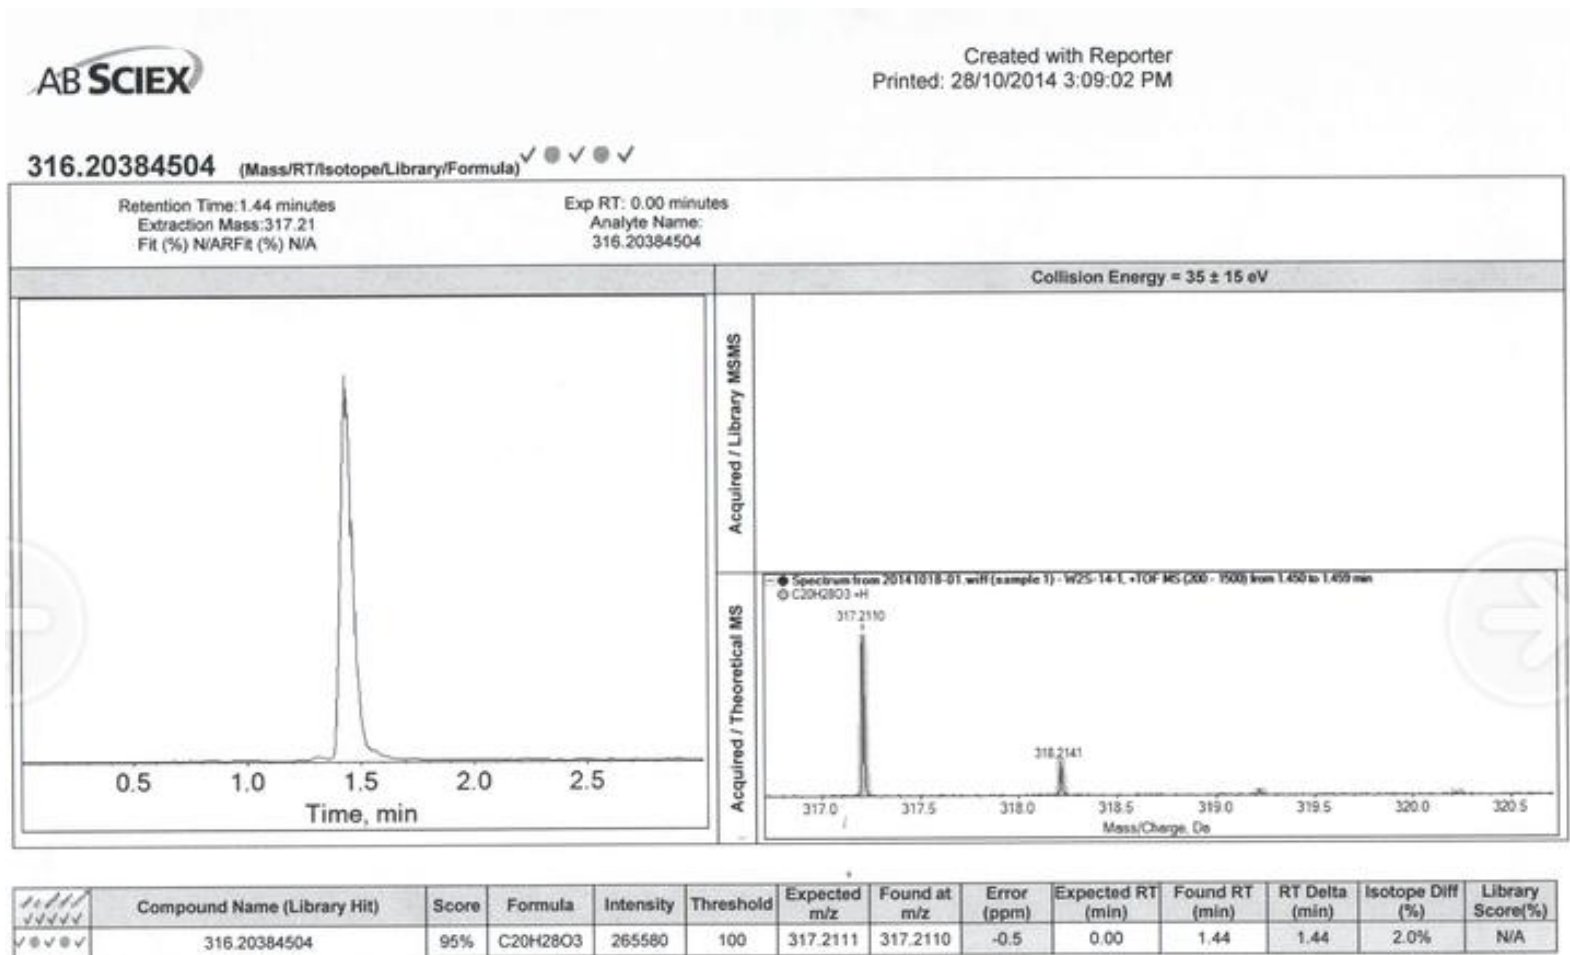

### Spectroscopic Data of the Known Compounds 12-39:

**Pinusolide acid (12):** pale yellow oil,  $[\alpha]_D^{20} +45.0^\circ$  (*c* 0.1, CDCl<sub>3</sub>). <sup>1</sup>H NMR (400 MHz, CDCl<sub>3</sub>):  $\delta$  0.62 (3H, s, Me-20), 1.08 (1H, m, H-1a), 1.08 (1H, m, H-3a), 1.26 (3H, s, H-18), 1.32 (1H, dd, *J* = 13.4, 3.6 Hz, H-5), 1.56 (2H, m, H-2a, H-11a), 1.61 (1H, dd, *J* = 11.4, 3.5 Hz, H-9), 1.78 (1H, m, H-6a), 1.82 (1H, m, H-1b), 1.86 (1H, m, H-11b), 1.88 (1H, m, H-2b), 1.93 (1H, m, H-6b), 2.01 (1H, dd, *J* = 13.0, 4.0 Hz, H-8a), 2.13 (1H, m, H-12a), 2.19 (1H, m, H-3b), 2.45 (2H, m, H-8b, H-12b), 4.60 (1H, s, H-17a), 4.79 (2H, dd, *J* = 3.6, 1.6 Hz, H<sub>2</sub>-15), 4.91 (1H, s, H-17b), 7.12 (1H, t, *J* = 1.6 Hz, H-14); (+) ESIMS *m/z* 333 [M+H]<sup>+</sup>, 355 [M+Na]<sup>+</sup>.

**Pinusolide (13):** pale yellow oil,  $[\alpha]_D^{20} +36.0^\circ$  (*c* 0.1, CDCl<sub>3</sub>). <sup>1</sup>H NMR (400 MHz, CDCl<sub>3</sub>):  $\delta$  0.52 (3H, s, Me-20), 1.08 (2H, m, H-1a, H-3a), 1.20 (3H, s, H-18), 1.32 (1H, dd, *J* = 13.4, 3.6 Hz, H-5), 1.56 (1H, m, H-2a), 1.56 (1H, m, H-11a), 1.61 (1H, dd, *J* = 11.4, 3.5 Hz, H-9), 1.78 (1H, m, H-6a), 1.82 (1H, m, H-1b), 1.86 (1H, m, H-11b), 1.88 (1H, m, H-2b), 1.93 (1H, m, H-6b), 2.01 (1H, dd, *J* = 13.0, 4.0 Hz, H-8a), 2.13 (1H, m, H-12a), 2.19 (1H, m, H-3b), 2.45 (2H, m, H-8b, H-12b), 3.63 (3H, s, H-21), 4.60 (1H, s, H-17a), 4.79 (2H, dd, *J* = 3.6, 1.6 Hz, H<sub>2</sub>-15), 4.91 (1H, s, H-17b), 7.12 (1H, t, *J* = 1.6 Hz, H-14), <sup>13</sup>C NMR (100 MHz, CDCl<sub>3</sub>):  $\delta$  39.2 (C-1), 19.8 (C-2), 38.2 (C-3), 44.3 (C-4), 56.3 (C-5), 26.1 (C-6), 38.6 (C-7), 147.4 (C-8), 55.6 (C-9), 40.3 (C-10), 21.8 (C-11), 24.6 (C-12), 134.8 (C-13), 143.8 (C-14), 70.1 (C-15), 174.3 (C-16), 106.6 (C-17), 28.8 (C-18), 177.7 (C-19), 12.5 (C-20), 51.2 (OCH<sub>3</sub>); (+) ESIMS *m/z* 347 [M+H]<sup>+</sup>, 369 [M+Na]<sup>+</sup>.

**16-Hydroxy-labda-8(17),13-dien-15,19-dioic acid butenolide (14):** colorless oil,  $[\alpha]_D^{20} +42.0^\circ$  (*c* 0.1, CDCl<sub>3</sub>). <sup>1</sup>H NMR (400 MHz, CDCl<sub>3</sub>):  $\delta$  0.61 (3H, s, Me-20), 1.04 (2H, m, H-1a, H-3a), 1.26 (3H, s, H-18), 1.32 (1H, dd, *J* = 13.4, 3.6 Hz, H-5), 1.52 (2H, m, H-2a, H-11a), 1.57 (1H, dd, *J* = 12.4, 3.2 Hz, H-9), 1.72 (1H, m, H-6a), 1.78 (1H, m, H-1b), 1.82 (1H, m, H-11b), 1.83 (1H, m, H-2b), 1.85 (1H, m, H-6b), 2.01 (1H, dd, *J* = 13.0, 4.0 Hz, H-8a), 2.13 (1H, m, H-12a, H-3b), 2.40 (1H, m, H-12b), 2.45 (1H, m, H-8b), 4.52 (1H, s, H-17a), 4.92 (1H, s, H-17b), 5.88 (1H, s, H-14), 6.00 (1H, s, H-16), <sup>13</sup>C NMR (100 MHz, CDCl<sub>3</sub>):  $\delta$  39.2 (C-1), 19.8 (C-2), 37.8 (C-3), 44.5 (C-4), 56.2 (C-5), 26.1 (C-6), 38.6 (C-7),

147.2 (C-8), 55.7 (C-9), 40.6 (C-10), 21.0 (C-11), 26.8 (C-12), 170.2 (C-13), 117.3 (C-14), 171.5 (C-15), 99.3 (C-16), 106.8 (C-17), 28.9 (C-18), 183.2 (C-19), 12.7 (C-20); (+) ESIMS  $m/z$  349 [M+H]<sup>+</sup>, 371 [M+Na]<sup>+</sup>.

**7-Oxo-12 $\alpha$ ,13 $\beta$ -dihydroxyabiet-8(14)-en-18-oic acid (15)**: pale-yellow amorphous powder,  $[\alpha]_D^{20} +12.5$  ( $c$  0.1, MeOH). <sup>1</sup>H NMR (400 MHz, CD<sub>3</sub>OD):  $\delta$  0.95 (3H, s, Me-20), 1.03 (3H, d,  $J = 6.8$  Hz, Me-16), 1.07 (3H, d,  $J = 6.8$  Hz, Me-17), 1.27 (3H, s, Me-19), 3.91 (1H, br s, H-12), 6.83 (1H, br s, H-14), <sup>13</sup>C NMR (100 MHz, CD<sub>3</sub>OD):  $\delta$  38.9 (C-1), 18.7 (C-2), 38.0 (C-3), 47.1 (C-4), 46.9 (C-5), 39.9 (C-6), 202.3 (C-7), 137.6 (C-8), 46.2 (C-9), 36.4 (C-10), 26.6 (C-11), 71.0 (C-12), 72.2 (C-13), 139.6 (C-14), 33.1 (C-15), 16.6 (C-16), 16.3 (C-17), 181.3 (C-18), 16.7 (C-19), 14.6 (C-20); (+) ESIMS  $m/z$  351 [M+H]<sup>+</sup>, 373 [M+Na]<sup>+</sup>.

**7-Oxo-13 $\beta$ ,15-dihydroxyabiet-8(14)-en-18-oic acid (16)**: pale-yellow amorphous powder,  $[\alpha]_D^{20} +17.5$  ( $c$  0.1, CDCl<sub>3</sub>). <sup>1</sup>H NMR (400 MHz, CDCl<sub>3</sub>):  $\delta$  0.92 (3H, s, Me-20), 1.19 (3H, s, Me-19), 1.28 (3H, s, Me-16), 1.32 (3H, s, Me-17), 7.05 (1H, br s, H-14), <sup>13</sup>C NMR (100 MHz, CDCl<sub>3</sub>):  $\delta$  37.8 (C-1), 17.8 (C-2), 36.8 (C-3), 45.9 (C-4), 44.1 (C-5), 38.6 (C-6), 202.6 (C-7), 137.5 (C-8), 51.5 (C-9), 35.4 (C-10), 18.6 (C-11), 32.0 (C-12), 72.6 (C-13), 139.2 (C-14), 75.0 (C-15), 23.9 (C-16), 24.7 (C-17), 182.2 (C-18), 16.2 (C-19), 14.5 (C-20); (+) ESIMS  $m/z$  335 [M+H]<sup>+</sup>, 357 [M+Na]<sup>+</sup>.

**7-Oxo-13 $\alpha$ ,15-dihydroxyabiet-8(14)-en-18-oic acid (17)**: pale-yellow amorphous powder,  $[\alpha]_D^{20} -17.5$  ( $c$  0.1, CDCl<sub>3</sub>). <sup>1</sup>H NMR (400 MHz, CDCl<sub>3</sub>):  $\delta$  0.86 (3H, s, Me-20), 0.94 (3H, d,  $J = 6.8$  Hz, Me-16), 0.97 (3H, d,  $J = 6.8$  Hz, Me-17), 1.24 (3H, s, Me-19); (+) ESIMS  $m/z$  335 [M+H]<sup>+</sup>, 357 [M+Na]<sup>+</sup>.

**Abiesadine E (18)**: colorless oil,  $[\alpha]_D^{20} -27.0$  ( $c$  0.1, CDCl<sub>3</sub>). <sup>1</sup>H NMR (400 MHz, CDCl<sub>3</sub>):  $\delta$  0.93 (3H, s, Me-20), 1.02 (3H, d,  $J = 6.8$  Hz, Me-16), 1.05 (3H, d,  $J = 6.8$  Hz, Me-17), 1.29 (3H, s, H-19), 1.58 (2H, m, H<sub>2</sub>-2), 1.62 (1H, m, H-3a), 1.82 (1H, dd,  $J = 13.6, 3.6$  Hz, H<sub>2</sub>-1), 2.05

(2H, m, H<sub>2</sub>-12), 2.11 (1H, dd,  $J = 14.1, 3.9$  Hz, H-5), 2.22 (1H, dd,  $J = 12.8, 3.6$  Hz, H-3b), 2.27 (1H, dd,  $J = 15.8, 14.1$  Hz, H-6a), 2.42 (1H, dd,  $J = 15.8, 3.9$  Hz, H-6b), 2.51 (1H, m, H-9), 2.86 (1H, sept.,  $J = 6.8$  Hz, H-15), 6.14 (1H, dd,  $J = 5.0, 2.4$  Hz, H-12), 6.86 (1H, s, H-14), <sup>13</sup>C NMR (100 MHz, CDCl<sub>3</sub>):  $\delta$  37.6 (C-1), 17.9 (C-2), 37.4 (C-3), 45.9 (C-4), 43.9 (C-5), 37.0 (C-6), 199.7 (C-7), 133.9 (C-8), 48.5 (C-9), 34.6 (C-10), 26.2 (C-11), 131.9 (C-12), 141.1 (C-13), 142.2 (C-14), 26.1 (C-15), 21.6 (C-16), 22.0 (C-17), 184.5 (C-18), 16.6 (C-19), 14.5 (C-20); (+) ESIMS  $m/z$  317 [M+H]<sup>+</sup>, 339 [M+Na]<sup>+</sup>.

**Abiesanordine K (19)**: white amorphous powder,  $[\alpha]_D^{20} +8.0$  ( $c$  0.1, CDCl<sub>3</sub>). <sup>1</sup>H NMR (400 MHz, CDCl<sub>3</sub>):  $\delta$  1.17 (3H, s, Me-20), 1.28 (3H, s, Me-20), 2.59 (3H, s, H-16), 4.85 (1H, br s, H-7), 7.38 (1H, d,  $J = 8.4$  Hz, H-11), 7.86 (1H, dd,  $J = 8.4, 2.1$  Hz, H-12), 7.94 (1H, d,  $J = 2.1$  Hz, H-14), <sup>13</sup>C NMR (100 MHz, CDCl<sub>3</sub>):  $\delta$  38.1 (C-1), 18.4 (C-2), 37.4 (C-3), 46.6 (C-4), 39.3 (C-5), 30.6 (C-6), 67.7 (C-7), 136.0 (C-8), 154.6 (C-9), 39.2 (C-10), 124.8 (C-11), 128.1 (C-12), 135.4 (C-13), 131.2 (C-14), 198.2 (C-15), 26.6 (C-16), 183.5 (C-18), 16.3 (C-19), 24.1 (C-20); (+) ESIMS  $m/z$  317 [M+H]<sup>+</sup>, 339 [M+Na]<sup>+</sup>.

**16-Nor-15-oxodehydroabietic acid (20)**: colorless oil,  $[\alpha]_D^{20} +47.0$  ( $c$  0.1, CDCl<sub>3</sub>). <sup>1</sup>H NMR (400 MHz, CDCl<sub>3</sub>):  $\delta$  1.19 (1H, m, H-3a), 1.25 (3H, s, Me-20), 1.29 (3H, s, Me-19), 1.33 (1H, m, H-1a), 1.54 (1H, m, H-1b), 1.56 (1H, m, H-6a), 1.75 (2H, m, H<sub>2</sub>-2), 1.80 (1H, m, H-3b), 1.87 (1H, m, H-6b), 2.26 (1H, dd,  $J = 12.4, 2.4$  Hz, H-5), 2.56 (3H, s, Me-16), 7.63 (1H, d,  $J = 8.4$  Hz, H-11), 7.66 (1H, d,  $J = 2.0$  Hz, H-14), 7.72 (1H, dd,  $J = 8.4, 2.0$  Hz, H-12), <sup>13</sup>C NMR (100 MHz, CDCl<sub>3</sub>):  $\delta$  37.7 (C-1), 18.4 (C-2), 36.6 (C-3), 47.3 (C-4), 44.2 (C-5), 21.5 (C-6), 29.9 (C-7), 135.4 (C-8), 155.5 (C-9), 37.6 (C-10), 124.6 (C-11), 125.8 (C-12), 134.5 (C-13), 129.2 (C-14), 198.2 (C-15), 26.6 (C-16), 183.2 (C-18), 16.3 (C-19), 24.8 (C-20); (+) ESIMS  $m/z$  301 [M+H]<sup>+</sup>, 323 [M+Na]<sup>+</sup>.

**17-Nor-7,15-dion-8,11,13-abietatrien-18-oic acid (21)**: colorless oil,  $[\alpha]_D^{20} +28.0$  ( $c$  0.1, CDCl<sub>3</sub>). <sup>1</sup>H NMR (400 MHz, CDCl<sub>3</sub>):  $\delta$  1.19 (1H, dd,  $J = 12.8, 4.0$  Hz, H-3a), 1.29 (3H, s, Me-20), 1.32 (3H, s, Me-19), 1.54 (1H, br d,  $J = 13.4$  Hz, H-1b), 1.75 (2H, m, H<sub>2</sub>-2), 1.80 (1H, br d,  $J =$

12.8 Hz, H-3b), 2.33 (1H, br d,  $J = 13.4$  Hz, H-1a), 2.42 (1H, dd,  $J = 16.8, 3.2$  Hz, H-6a), 2.63 (3H, s, Me-16), 2.68 (1H, dd,  $J = 14.0, 3.2$  Hz, H-5), 2.86 (1H, dd,  $J = 16.8, 14.0$  Hz, H-6b), 7.52 (1H, d,  $J = 8.4$  Hz, H-11), 8.18 (1H, dd,  $J = 8.4, 2.0$  Hz, H-12), 8.56 (1H, dd,  $J = 2.0$  Hz, H-14),  $^{13}\text{C}$  NMR (100 MHz,  $\text{CDCl}_3$ ):  $\delta$  37.7 (C-1), 18.4 (C-2), 36.6 (C-3), 47.3 (C-4), 45.2 (C-5), 38.5 (C-6), 199.5 (C-7), 132.4 (C-8), 161.0 (C-9), 37.8 (C-10), 124.6 (C-11), 134.8 (C-12), 136.5 (C-13), 128.5 (C-14), 198.2 (C-15), 26.6 (C-16), 182.2 (C-18), 16.3 (C-19), 24.8 (C-20); (+) ESIMS  $m/z$  315  $[\text{M}+\text{H}]^+$ , 337  $[\text{M}+\text{Na}]^+$ , 629  $[2\text{M}+\text{H}]^+$ .

**Methyl 13-acetyl-7-oxo-podocarpa-8,11,13-trien-15-oate (22):** colorless oil,  $[\alpha]_{\text{D}}^{20} +39.0$  ( $c$  0.1,  $\text{CDCl}_3$ ).  $^1\text{H}$  NMR (400 MHz,  $\text{CDCl}_3$ ):  $\delta$  1.19 (1H, dd,  $J = 12.8, 4.0$  Hz, H-3a), 1.29 (3H, s, Me-20), 1.32 (3H, s, Me-19), 1.54 (1H, br d,  $J = 13.4$  Hz, H-1b), 1.75 (2H, m, H<sub>2</sub>-2), 1.80 (1H, br d,  $J = 12.8$  Hz, H-3b), 2.33 (1H, br d,  $J = 13.4$  Hz, H-1a), 2.42 (1H, dd,  $J = 16.8, 3.2$  Hz, H-6a), 2.65 (3H, s, Me-16), 2.68 (1H, dd,  $J = 14.0, 3.2$  Hz, H-5), 2.86 (1H, dd,  $J = 16.8, 14.0$  Hz, H-6b), 3.69 (3H, s, OMe), 7.52 (1H, d,  $J = 8.4$  Hz, H-11), 8.18 (1H, dd,  $J = 8.4, 2.0$  Hz, H-12), 8.56 (1H, dd,  $J = 2.0$  Hz, H-14); (+) ESIMS  $m/z$  329  $[\text{M}+\text{H}]^+$ , 327  $[\text{M}-\text{H}]^-$ .

**8(14)-Podocarpin-13-on-18-oic acid (23):** pale yellow oil,  $[\alpha]_{\text{D}}^{20} +12.0$  ( $c$  0.1,  $\text{CDCl}_3$ ).  $^1\text{H}$  NMR (400 MHz,  $\text{CDCl}_3$ ):  $\delta$  0.87 (3H, s, Me-20), 1.26 (3H, s, Me-19), 6.01 (1H, br s, H-14),  $^{13}\text{C}$  NMR (100 MHz,  $\text{CDCl}_3$ ):  $\delta$  38.4 (C-1), 17.8 (C-2), 36.8 (C-3), 47.1 (C-4), 47.7 (C-5), 24.0 (C-6), 35.3 (C-7), 168.7 (C-8), 51.7 (C-9), 38.1 (C-10), 20.0 (C-11), 36.1 (C-12), 202.6 (C-13), 125.7 (C-14), 184.6 (C-18), 16.7 (C-19), 15.6 (C-20); (+) ESIMS  $m/z$  277  $[\text{M}+\text{H}]^+$ , 299  $[\text{M}+\text{Na}]^+$ .

**Abiesanordine E (24):** pale yellow oil,  $[\alpha]_{\text{D}}^{20} +12.0$  ( $c$  0.1,  $\text{CDCl}_3$ ).  $^1\text{H}$  NMR (400 MHz,  $\text{CDCl}_3$ ):  $\delta$  0.86 (3H, s, Me-20), 1.26 (3H, s, Me-19), 2.35 (1H, m, H-12a), 2.42 (1H, s, H-12b), 2.58 (1H, dd,  $J = 14.0, 3.2$  Hz, H-5), 2.64 (1H, dd,  $J = 12.8, 3.0$  Hz, H-9), 4.39 (1H, br s, H-7), 6.01 (1H, br s, H-14),  $^{13}\text{C}$  NMR (100 MHz,  $\text{CDCl}_3$ ):  $\delta$  37.9 (C-1), 18.0 (C-2), 36.5 (C-3), 46.5 (C-4), 41.4 (C-5), 31.5 (C-6), 71.2 (C-7), 163.0 (C-8), 47.3 (C-9), 38.9 (C-10), 20.1 (C-11), 36.5 (C-12), 201.0 (C-13), 128.1 (C-14), 184.0 (C-18), 16.5 (C-19), 14.9 (C-20); (+) ESIMS  $m/z$  293

[M+H]<sup>+</sup>, 315 [M+Na]<sup>+</sup>.

**8(14)-Podocarpin-7,13-dione-18-oic acid (25):** pale yellow oil,  $[\alpha]_D^{20} +22.0$  (*c* 0.1, CDCl<sub>3</sub>). <sup>1</sup>H NMR (400 MHz, CDCl<sub>3</sub>):  $\delta$  0.97 (3H, s, Me-20), 1.30 (3H, s, Me-19), 2.37 (1H, m, H-12a), 2.50 (1H, dd, overlapped, H-5), 2.50 (1H, dd, overlapped, H-6a), 2.52 (1H, dd, *J* = 16.8, 14.0 Hz, H-5), 2.56 (1H, dd, *J* = 13.6, 3.6 Hz, H-9), 2.66 (1H, br d, *J* = 15.8 Hz, H-12b), 4.39 (1H, br s, H-7), 6.01 (1H, br s, H-14); (+) ESIMS *m/z* 291 [M+H]<sup>+</sup>, 313 [M+Na]<sup>+</sup>.

**7-Oxo-13-Hydroxy-podocarpa-8,11,13-trien-18-oic acid (26):** pale yellow oil,  $[\alpha]_D^{20} +29.0$  (*c* 0.1, CDCl<sub>3</sub>). <sup>1</sup>H NMR (400 MHz, CDCl<sub>3</sub>):  $\delta$  1.25 (3H, s, Me-20), 1.31 (3H, s, Me-19), 2.48 (1H, dd, *J* = 17.2, 2.4 Hz, H-12a), 2.64 (1H, dd, *J* = 14.2, 2.4 Hz, H-5), 2.70 (1H, dd, *J* = 17.2, 14.0 Hz, H-9), 2.66 (1H, br d, *J* = 15.8 Hz, H-12b), 7.06 (1H, dd, *J* = 8.0, 2.0 Hz, H-12), 7.24 (1H, d, *J* = 8.0 Hz, H-11), 7.49 (1H, d, *J* = 2.0 Hz, H-14), <sup>13</sup>C NMR (100 MHz, CDCl<sub>3</sub>):  $\delta$  37.2 (C-1), 18.1 (C-2), 36.9 (C-3), 46.1 (C-4), 43.6 (C-5), 36.5 (C-6), 199.4 (C-7), 131.4 (C-8), 148.0 (C-9), 37.7 (C-10), 125.1 (C-11), 112.8 (C-12), 154.5 (C-13), 122.3 (C-14), 182.7 (C-18), 16.1 (C-19), 23.6 (C-20); (+) ESIMS *m/z* 289 [M+H]<sup>+</sup>, 311 [M+Na]<sup>+</sup>, 577 [2M+H]<sup>+</sup>, 599 [2M+Na]<sup>+</sup>.

**12 $\alpha$ -Hydroxyabietic acid (27):** pale-yellow amorphous powder,  $[\alpha]_D^{20} +32.0$  (*c* 0.1, CDCl<sub>3</sub>). <sup>1</sup>H NMR (400 MHz, CDCl<sub>3</sub>):  $\delta$  0.88 (3H, s, Me-20), 1.02 (1H, m, H-1a), 1.08 (1H, m, H-3a), 1.09 (3H, d, *J* = 7.2 Hz, Me-16), 1.11 (3H, d, *J* = 7.2 Hz, Me-17), 1.27 (3H, s, Me-19), 1.50 (1H, m, H-2a), 1.82 (1H, m, H-11a), 1.92 (1H, m, H-1b), 1.94 (2H, m, H-2b, H-6a), 1.97 (1H, m, H-11b), 2.02 (1H, m, H-6b), 2.17 (1H, br d, *J* = 12.4 Hz, H-3b), 2.21 (1H, dd, *J* = 13.5, 3.6 Hz, H-9), 2.35 (1H, dd, *J* = 13.5, 3.6 Hz, H-5), 2.42 (1H, sept., *J* = 7.2 Hz, H-15), 4.25 (1H, br s, H-12), 4.52 (1H, br s, H-7), 5.86 (1H, br s, H-14); (+) ESIMS *m/z* 319 [M+H]<sup>+</sup>, 331 [M+Na]<sup>+</sup>.

**7-Oxo-13-*epi*-pimara-8,15-dien-18-oic acid (28):** white amorphous powder,  $[\alpha]_D^{20} +65.0$  (*c* 0.1, CHCl<sub>3</sub>). <sup>1</sup>H NMR (400 MHz, CDCl<sub>3</sub>):  $\delta$  1.00



(3H, s, Me-20), 1.12 (3H, s, Me-17), 1.27 (3H, s, Me-19), 4.88 (1H, br d,  $J = 17.0$  Hz, H-16a), 4.96 (1H, br d,  $J = 11.0$  Hz, H-16b), 5.68 (1H, dd,  $J = 17.0, 11.0$  Hz, H-15),  $^{13}\text{C}$  NMR (100 MHz,  $\text{CDCl}_3$ ):  $\delta$  36.0 (C-1), 17.8 (C-2), 36.8 (C-3), 46.3 (C-4), 44.8 (C-5), 34.6 (C-6), 199.6 (C-7), 129.0 (C-8), 165.8 (C-9), 39.1 (C-10), 22.8 (C-11), 33.5 (C-12), 34.4 (C-13), 33.3 (C-14), 144.8 (C-15), 111.7 (C-16), 28.0 (C-17), 181.5 (C-18), 16.2 (C-19), 18.0 (C-20); (+) ESIMS  $m/z$  317  $[\text{M}+\text{H}]^+$ , 329  $[\text{M}+\text{Na}]^+$ .

**Piceanolactones A (29):** white amorphous powder,  $[\alpha]_{\text{D}}^{20} +15.0$  ( $c$  0.1,  $\text{CHCl}_3$ ).  $^1\text{H}$  NMR (400 MHz,  $\text{CDCl}_3$ ):  $\delta$  1.31 (3H, d,  $J = 7.2$  Hz, Me-16), 1.31 (3H, d,  $J = 7.2$  Hz, Me-17), 1.39 (1H, m, H-1a), 1.50 (1H, m, H-3a), 1.63 (3H, s, Me-20), 1.67 (3H, s, Me-19), 1.85 (2H, m,  $\text{H}_2$ -2), 2.18 (1H, m, H-3b), 2.34 (1H, br d,  $J = 12.4$  Hz, H-5), 3.04 (1H, sept.,  $J = 7.2$  Hz, H-15), 7.48 (1H, d,  $J = 8.0$  Hz, H-11), 7.52 (1H, dd,  $J = 8.0, 2.0$  Hz, H-12), 8.18 (1H, d,  $J = 2.0$  Hz, H-14); (+) ESIMS  $m/z$  311  $[\text{M}+\text{H}]^+$ , 621  $[\text{2M}+\text{H}]^+$ .

**Piceanolactones B (30):** white amorphous powder,  $[\alpha]_{\text{D}}^{20} +15.0$  ( $c$  0.1,  $\text{CHCl}_3$ ).  $^1\text{H}$  NMR (400 MHz,  $\text{CDCl}_3$ ):  $\delta$  1.61 (3H, s, Me-16), 1.61 (3H, s, Me-17), 1.63 (3H, s, Me-20), 1.65 (3H, s, Me-19), 7.50 (1H, d,  $J = 8.0$  Hz, H-11), 7.82 (1H, dd,  $J = 8.0, 2.0$  Hz, H-12), 8.32 (1H, d,  $J = 2.0$  Hz, H-14); (+) ESIMS  $m/z$  327  $[\text{M}+\text{H}]^+$ , 653  $[\text{2M}+\text{H}]^+$ .

**Piceanolactones C (31):** white amorphous powder,  $[\alpha]_{\text{D}}^{20} +15.0$  ( $c$  0.1,  $\text{CHCl}_3$ ).  $^1\text{H}$  NMR (400 MHz,  $\text{DMSO}-d_6$ ):  $\delta$  1.24 (3H, d,  $J = 7.2$  Hz, Me-16), 1.24 (3H, d,  $J = 7.2$  Hz, Me-17), 1.34 (1H, m, H-1a), 1.50 (1H, m, H-3a), 1.56 (3H, s, Me-20), 1.59 (3H, s, Me-19), 1.85 (2H, m,  $\text{H}_2$ -2), 2.11 (1H, m, H-3b), 2.22 (1H, br d,  $J = 12.4$  Hz, H-5), 3.30 (1H, sept.,  $J = 7.2$  Hz, H-15), 7.06 (1H, s, H-11), 7.98 (1H, s, H-12),  $^{13}\text{C}$  NMR (100 MHz,  $\text{CDCl}_3$ ):  $\delta$  40.7 (C-1), 20.4 (C-2), 37.7 (C-3), 48.4 (C-4), 147.6 (C-5), 143.9 (C-6), 175.7 (C-7), 124.4 (C-8), 153.8 (C-9), 44.2 (C-10), 113.0 (C-11), 162.0 (C-12), 137.0 (C-13), 126.6 (C-14), 28.5 (C-15), 23.2 (C-16), 23.2 (C-17), 182.1 (C-18), 22.0 (C-19), 25.4 (C-20); (+) ESIMS  $m/z$  327  $[\text{M}+\text{H}]^+$ , 349  $[\text{M}+\text{Na}]^+$ .

**Dehydroabiatic acid (32):** pale yellow oil,  $[\alpha]_D^{20} +30.0^\circ$  (*c* 0.1, CHCl<sub>3</sub>). <sup>1</sup>H NMR (400 MHz, CDCl<sub>3</sub>):  $\delta$  1.19 (1H, dd, *J* = 12.8, 4.0 Hz, H-3a), 1.23 (3H, d, *J* = 7.2 Hz, Me-16), 1.23 (3H, d, *J* = 7.2 Hz, Me-17), 1.25 (3H, s, Me-20), 1.29 (3H, s, H-19), 1.54 (2H, m, H-1a, H-6a), 1.75 (2H, m, H<sub>2</sub>-2), 1.80 (1H, m, H-3b), 1.87 (1H, m, H-6b), 2.26 (1H, dd, *J* = 12.4, 2.4 Hz, H-5), 2.33 (1H, br d, *J* = 13.5 Hz, H-1b), 2.92 (2H, m, H<sub>2</sub>-7), 2.94 (1H, sept., *J* = 7.2 Hz, H-15), 6.91 (1H, d, *J* = 2.0 Hz, H-14), 7.02 (1H, dd, *J* = 8.0, 2.0 Hz, H-12), 7.19 (1H, d, *J* = 8.0 Hz, H-11); (+) ESIMS *m/z* 301 [M+H]<sup>+</sup>, 323 [M+Na]<sup>+</sup>.

**12-Hydroxydehydroabiatic acid (33):** pale yellow oil,  $[\alpha]_D^{20} +35.0^\circ$  (*c* 0.1, CHCl<sub>3</sub>). <sup>1</sup>H NMR (400 MHz, CDCl<sub>3</sub>):  $\delta$  1.22 (3H, s, Me-20), 1.25 (3H, d, *J* = 7.2 Hz, Me-16), 1.27 (3H, d, *J* = 7.2 Hz, Me-17), 1.29 (3H, s, H-19), 1.52 (1H, m, overlapped, H-6a), 1.52 (1H, dd, overlapped, H-1a), 1.70 (1H, m, H-3a), 1.74 (2H, m, H<sub>2</sub>-2), 1.79 (1H, m, H-3b), 1.82 (1H, m, H-6b), 2.22 (1H, dd, *J* = 12.5, 2.2 Hz, H-5), 2.25 (1H, br d, *J* = 13.5 Hz, H-1b), 2.83 (2H, m, H<sub>2</sub>-7), 3.12 (1H, sept., *J* = 7.2 Hz, H-15), 6.64 (1H, s, H-11), 6.85 (1H, s, H-14), <sup>13</sup>C NMR (100 MHz, CDCl<sub>3</sub>):  $\delta$  37.9 (C-1), 18.5 (C-2), 36.7 (C-3), 47.4 (C-4), 44.5 (C-5), 21.9 (C-6), 29.2 (C-7), 127.0 (C-8), 147.8 (C-9), 36.8 (C-10), 110.8 (C-11), 150.7 (C-12), 131.8 (C-13), 126.7 (C-14), 26.8 (C-15), 22.7 (C-16), 22.5 (C-17), 184.5 (C-18), 16.2 (C-19), 25.0 (C-20); (+) ESIMS *m/z* 317 [M+H]<sup>+</sup>, 339 [M+Na]<sup>+</sup>.

**15-Hydroxydehydroabiatic acid (34):** pale yellow powder,  $[\alpha]_D^{20} +16.5$  (*c* 0.1, MeOH). <sup>1</sup>H NMR (400 MHz, CDCl<sub>3</sub>):  $\delta$  1.24 (3H, s, Me-20), 1.31 (3H, s, Me-19), 1.50 (1H, m, H-1a), 1.52 (1H, m, H-6a), 1.58 (6H, s, Me-16, 17), 1.60 (2H, m, H<sub>2</sub>-2), 1.70 (1H, m, H-3a), 1.82 (1H, m, H-6b), 1.94 (1H, m, H-3b), 2.24 (1H, dd, *J* = 12.5, 2.2 Hz, H-5), 2.26 (1H, m, H-1b), 7.17 (1H, d, *J* = 2.0 Hz, H-14), 7.24 (1H, dd, *J* = 8.4, 2.0 Hz, H-12), 7.26 (1H, d, *J* = 8.4 Hz, H-11), <sup>13</sup>C NMR (100 MHz, CDCl<sub>3</sub>):  $\delta$  38.5 (C-1), 18.2 (C-2), 37.1 (C-3), 47.3 (C-4), 45.3 (C-5), 22.1 (C-6), 30.5 (C-7), 136.2 (C-8), 148.2 (C-9), 37.3 (C-10), 124.2 (C-11), 122.9 (C-12), 147.7 (C-13), 125.7 (C-14), 71.3 (C-15), 32.5 (C-16), 32.5 (C-17), 180.8 (C-18), 17.1 (C-19), 25.2 (C-20); (+) ESIMS *m/z* 317 [M+H]<sup>+</sup>, 329 [M+Na]<sup>+</sup>.

**Abieta-8,11,13,15-tetraen-18-oic acid (35):** white amorphous powder,  $[\alpha]_D^{20} +55.0$  (*c* 0.1, MeOH).  $^1\text{H NMR}$  (400 MHz,  $\text{CDCl}_3$ ):  $\delta$  1.25 (3H, s, Me-20), 1.29 (3H, s, Me-19), 1.50 (2H, m, H-1a, H-6a), 1.72 (1H, m, H-3a), 1.75 (2H, m, H<sub>2</sub>-2), 1.80 (1H, m, H-3b), 1.84 (1H, m, H-6b), 2.14 (3H, br s, H-17), 2.25 (1H, dd,  $J = 12.4, 2.1$  Hz, H-5), 2.33 (1H, br d,  $J = 13.5$  Hz, H-1b), 2.94 (2H, m, H<sub>2</sub>-7), 5.04 (1H, br s, H-16a), 5.34 (1H, br s, H-16b), 7.16 (1H, d,  $J = 2.0$  Hz, H-14), 7.20 (1H, d,  $J = 8.0$  Hz, H-11), 7.26 (1H, dd,  $J = 8.0, 2.0$  Hz, H-12); (+) ESIMS  $m/z$  299  $[\text{M}+\text{H}]^+$ , 321  $[\text{M}+\text{Na}]^+$ .

**7-Oxocallitrisic acid (36):** white amorphous powder,  $[\alpha]_D^{20} +59.0$  (*c* 0.1,  $\text{CHCl}_3$ ).  $^1\text{H NMR}$  (400 MHz,  $\text{CDCl}_3$ ):  $\delta$  1.26 (3H, d,  $J = 7.2$  Hz, Me-16), 1.27 (3H, d,  $J = 7.2$  Hz, Me-17), 1.29 (3H, s, H-19), 1.30 (3H, s, Me-20), 1.35 (3H, s, Me-19), 1.60 (1H, m, H-2a), 1.78 (1H, m, H-2b), 1.82 (1H, m, H-1a), 1.88 (1H, m, H-3a), 1.93 (1H, m, H-1b), 2.39 (1H, dd,  $J = 17.4, 2.8$  Hz, H-6a), 2.45 (1H, br d,  $J = 13.5$  Hz, H-3b), 2.67 (1H, dd,  $J = 14.0, 2.8$  Hz, H-5), 2.82 (1H, dd,  $J = 17.4, 14.0$  Hz, H-6b), 2.93 (1H, sept.,  $J = 7.2$  Hz, H-15), 7.41 (1H, d,  $J = 8.0$  Hz, H-11), 7.51 (1H, dd,  $J = 8.0, 2.0$  Hz, H-12), 7.83 (1H, d,  $J = 2.0$  Hz, H-14); (+) ESIMS  $m/z$  315  $[\text{M}+\text{H}]^+$ , 629  $[\text{2M}+\text{H}]^+$ .

**15-Hydroxy-7-oxo-8,11,13-abietatrien-18-oic acid (37):** pale yellow powder,  $[\alpha]_D^{20} +16.5$  (*c* 0.1,  $\text{CHCl}_3$ ).  $^1\text{H NMR}$  (400 MHz,  $\text{CDCl}_3$ ):  $\delta$  1.27 (3H, s, Me-20), 1.29 (3H, s, Me-19), 1.58 (6H, s, Me-16, 17), 1.68 (1H, m, H-1a), 1.80 (5H, m, H-1b, H<sub>2</sub>-2, H<sub>2</sub>-3), 2.42 (1H, dd,  $J = 17.0, 3.2$  Hz, H-6a), 2.68 (1H, dd,  $J = 13.5, 3.2$  Hz, H-5), 2.86 (1H, dd,  $J = 17.0, 13.5$  Hz, H-6b), 7.38 (1H, d,  $J = 8.4$  Hz, H-11), 7.76 (1H, dd,  $J = 8.4, 2.1$  Hz, H-12), 8.06 (1H, d,  $J = 2.1$  Hz, H-14),  $^{13}\text{C NMR}$  (100 MHz,  $\text{CDCl}_3$ ):  $\delta$  37.7 (C-1), 18.1 (C-2), 37.0 (C-3), 46.3 (C-4), 43.5 (C-5), 36.4 (C-6), 198.8 (C-7), 130.4 (C-8), 153.8 (C-9), 37.3 (C-10), 123.6 (C-11), 130.7 (C-12), 147.3 (C-13), 123.3 (C-14), 72.4 (C-15), 31.7 (C-16), 31.5 (C-17), 182.5 (C-18), 16.1 (C-19), 23.6 (C-20); (+) ESIMS  $m/z$  331  $[\text{M}+\text{H}]^+$ , 353  $[\text{M}+\text{Na}]^+$ .

**Methyl 15-hydroxy-7-oxo-dehydroabietate (38):** pale yellow powder,  $[\alpha]_D^{20} +36.5$  (*c* 0.1,  $\text{CHCl}_3$ ).  $^1\text{H NMR}$  (400 MHz,  $\text{CDCl}_3$ ):  $\delta$  1.29 (3H, s, Me-19), 1.37 (3H, s, Me-20), 1.61 (6H, s, Me-16, 17), 1.63 (1H, m, H-1a), 1.80 (5H, m, H-1b, H<sub>2</sub>-2, H<sub>2</sub>-3), 2.40 (1H, dd,  $J = 17.0, 3.2$  Hz, H-6a),

2.42 (1H, dd,  $J = 13.5, 3.2$  Hz, H-5), 2.75 (1H, dd,  $J = 17.0, 13.5$  Hz, H-6b), 3.67 (3H, s, OMe-21), 7.38 (1H, d,  $J = 8.4$  Hz, H-11), 7.75 (1H, dd,  $J = 8.4, 2.1$  Hz, H-12), 8.08 (1H, d,  $J = 2.1$  Hz, H-14); (+) ESIMS  $m/z$  345  $[M+H]^+$ , 367  $[M+Na]^+$ , 689  $[2M+H]^+$ .

**Abiesadine O (39):** pale yellow powder,  $[\alpha]_D^{20} +26.0$  ( $c$  0.1,  $CHCl_3$ ).  $^1H$  NMR (400 MHz,  $CDCl_3$ ):  $\delta$  1.19 (3H, s, Me-20), 1.29 (3H, s, Me-19), 1.47 (1H, m, H-1a), 1.54 (6H, s, Me-16, 17), 1.66 (1H, m, H-6a), 1.68 (1H, m, H-3a), 1.72 (1H, m, H-2a), 1.80 (1H, m, H-2b), 1.92 (1H, m, H-3b), 2.16 (1H, br dd,  $J = 17.0, 13.2$  Hz, H-6b), 2.39 (1H, m, H-1b), 2.56 (1H, dd,  $J = 13.2, 3.2$  Hz, H-5), 3.07 (3H, s, OMe), 4.75 (1H, br s, H-7), 7.31 (1H, d,  $J = 8.4$  Hz, H-11), 7.34 (1H, dd,  $J = 8.4, 2.0$  Hz, H-12), 7.37 (1H, d,  $J = 2.0$  Hz, H-14); (+) ESIMS  $m/z$  347  $[M+H]^+$ , 369  $[M+Na]^+$ .
